# Supplementary material
Source: PubMed Central journal article supplement (PMC6503638)
Supplement: jamainternmed-179-624-s001.pdf [file jamainternmed-179-624-s001.pdf]

## Supplementary Online Content

Azar M, Riehm KE, Saadat N, et al. Evaluation of journal registration policies and prospective registration of randomized clinical trials of nonregulated health care interventions. *JAMA Intern Med*. Published online March 11, 2019. doi: 10.1001/jamainternmed.2018.8009

**eTable 1.** Journal Inclusion/Exclusion by 2014 Thomson Reuters Science Citation Index—Expanded (SCIE) Categories

**eTable 2.** PubMed Search Terms

**eTable 3.** Included Trials and Registration Status Classification

This supplementary material has been provided by the authors to give readers additional information about their work.

**eTable 1.** Journal Inclusion/Exclusion by 2014 Thomson Reuters Science Citation Index - Expanded (SCIE) Categories

| <b>Thomson Reuters Journal Name</b>           | <b>Included?</b> | <b>PubMed Journal Name</b>                                                                | <b>Reason for Exclusion</b> |
|-----------------------------------------------|------------------|-------------------------------------------------------------------------------------------|-----------------------------|
| <b>Behavioural Sciences</b>                   |                  |                                                                                           |                             |
| Acta Ethologica                               | Yes              | Acta ethologica                                                                           | -----                       |
| Advances in the Study of Behavior             | No               | -----                                                                                     | No PubMed citations         |
| Aggressive Behavior                           | Yes              | Aggressive behavior                                                                       | -----                       |
| Animal Behaviour                              | Yes              | Animal behaviour                                                                          | -----                       |
| Animal Cognition                              | Yes              | Animal cognition                                                                          | -----                       |
| Appetite                                      | Yes              | Appetite <sup>a</sup>                                                                     | -----                       |
| Applied Animal Behaviour Science              | Yes              | Applied animal behaviour science                                                          | -----                       |
| Autism Research                               | Yes              | Autism research : official journal of the International Society for Autism Research       | -----                       |
| Behavior Genetics                             | Yes              | Behavior genetics                                                                         | -----                       |
| Behavioral and Brain Functions                | Yes              | Behavioral and brain functions : BBF                                                      | -----                       |
| Behavioral and Brain Sciences                 | Yes              | The Behavioral and brain sciences                                                         | -----                       |
| Behavioral Ecology                            | Yes              | Behavioral ecology : official journal of the International Society for Behavioral Ecology | -----                       |
| Behavioral Ecology and Sociobiology           | Yes              | Behavioral ecology and sociobiology                                                       | -----                       |
| Behavioral Medicine                           | Yes              | Behavioral medicine (Washington, D.C.)                                                    | -----                       |
| Behavioral Neuroscience                       | Yes              | Behavioral neuroscience                                                                   | -----                       |
| Behaviour                                     | Yes              | Behaviour                                                                                 | -----                       |
| Behavioural Brain Research                    | Yes              | Behavioural brain research                                                                | -----                       |
| Behavioural Pharmacology                      | Yes              | Behavioural pharmacology                                                                  | -----                       |
| Behavioural Processes                         | Yes              | Behavioural processes                                                                     | -----                       |
| Biological Psychology                         | Yes              | Biological psychology                                                                     | -----                       |
| Brain and Behavior                            | Yes              | Brain and behavior                                                                        | -----                       |
| Brain Behavior and Evolution                  | Yes              | Brain, behavior and evolution                                                             | -----                       |
| Chemical Senses                               | Yes              | Chemical senses                                                                           | -----                       |
| Cognitive Affective & Behavioral Neuroscience | Yes              | Cognitive, affective & behavioral neuroscience                                            | -----                       |

|                                                                                               |     |                                                                                                                                                                                            |       |
|-----------------------------------------------------------------------------------------------|-----|--------------------------------------------------------------------------------------------------------------------------------------------------------------------------------------------|-------|
| Cognitive and Behavioral Neurology                                                            | Yes | Cognitive and behavioral neurology : official journal of the Society for Behavioral and Cognitive Neurology                                                                                | ----- |
| Cortex                                                                                        | Yes | Cortex                                                                                                                                                                                     | ----- |
| Epilepsy & Behavior                                                                           | Yes | Epilepsy & behavior : E&B                                                                                                                                                                  | ----- |
| Ethology                                                                                      | Yes | Ethology : formerly zeitschrift für tierpsychologie                                                                                                                                        | ----- |
| Ethology Ecology & Evolution                                                                  | Yes | Ethology, ecology & evolution                                                                                                                                                              | ----- |
| Evolution and Human Behavior                                                                  | Yes | Evolution and human behavior : official journal of the Human Behavior and Evolution Society                                                                                                | ----- |
| Frontiers in Behavioral Neuroscience                                                          | Yes | Frontiers in behavioral neuroscience                                                                                                                                                       | ----- |
| Genes Brain and Behavior                                                                      | Yes | Genes, brain, and behavior                                                                                                                                                                 | ----- |
| Hormones and Behavior                                                                         | Yes | Hormones and behavior                                                                                                                                                                      | ----- |
| Human Factors                                                                                 | Yes | Human factors                                                                                                                                                                              | ----- |
| Journal of Comparative Physiology A-Neuroethology<br>Sensory Neural and Behavioral Physiology | Yes | Journal of comparative physiology. A, Neuroethology, sensory, neural, and behavioral physiology                                                                                            | ----- |
| Journal of Comparative Psychology                                                             | Yes | Journal of comparative psychology (Washington, D.C. : 1983) <sup>a</sup>                                                                                                                   | ----- |
| Journal of Developmental and Behavioral Pediatrics                                            | Yes | Journal of developmental and behavioral pediatrics : JDBP                                                                                                                                  | ----- |
| Journal of ECT                                                                                | Yes | The journal of ECT                                                                                                                                                                         | ----- |
| Journal of Ethology                                                                           | Yes | Journal of ethology                                                                                                                                                                        | ----- |
| Journal of Experimental Psychology-Animal Learning and Cognition                              | Yes | Journal of experimental psychology. Animal learning and cognition <sup>a</sup>                                                                                                             | ----- |
| Journal of the Experimental Analysis of Behavior                                              | Yes | Journal of the experimental analysis of behavior                                                                                                                                           | ----- |
| Journal of Veterinary Behavior-Clinical Applications and Research                             | Yes | Journal of veterinary behavior : clinical applications and research : official journal of : Australian Veterinary Behaviour Interest Group, International Working Dog Breeding Association | ----- |
| Language Cognition and Neuroscience                                                           | Yes | Language, cognition and neuroscience                                                                                                                                                       | ----- |
| Learning & Behavior                                                                           | Yes | Learning & behavior                                                                                                                                                                        | ----- |
| Neurobiology of Learning and Memory                                                           | Yes | Neurobiology of learning and memory                                                                                                                                                        | ----- |
| Neuropsychologia                                                                              | Yes | Neuropsychologia                                                                                                                                                                           | ----- |
| Neuroscience and Biobehavioral Reviews                                                        | Yes | Neuroscience and biobehavioral reviews                                                                                                                                                     | ----- |

|                                                           |     |                                                                                                           |                                                          |
|-----------------------------------------------------------|-----|-----------------------------------------------------------------------------------------------------------|----------------------------------------------------------|
| Pharmacology Biochemistry and Behavior                    | Yes | Pharmacology, biochemistry, and behavior                                                                  | -----                                                    |
| Physiology & Behavior                                     | Yes | Physiology & behavior                                                                                     | -----                                                    |
| Stress-The International Journal on the Biology of Stress | Yes | Stress (Amsterdam, Netherlands)                                                                           | -----                                                    |
| Trends in Cognitive Sciences                              | Yes | Trends in cognitive sciences                                                                              | -----                                                    |
| <b>Nursing</b>                                            |     |                                                                                                           |                                                          |
| Acta Paulista de Enfermagem                               | No  | -----                                                                                                     | No PubMed citations                                      |
| Advances in Neonatal Care                                 | Yes | Advances in neonatal care : official journal of the National Association of Neonatal Nurses               | -----                                                    |
| Advances in Nursing Science                               | Yes | ANS. Advances in nursing science                                                                          | -----                                                    |
| Advances in Skin & Wound Care                             | Yes | Advances in skin & wound care                                                                             | -----                                                    |
| American Journal of Critical Care                         | Yes | American journal of critical care : an official publication, American Association of Critical-Care Nurses | -----                                                    |
| American Journal of Nursing                               | Yes | The American journal of nursing                                                                           | -----                                                    |
| Applied Nursing Research                                  | Yes | Applied nursing research : ANR                                                                            | -----                                                    |
| Archives of Psychiatric Nursing                           | Yes | Archives of psychiatric nursing                                                                           | -----                                                    |
| Asian Nursing Research                                    | Yes | Asian nursing research                                                                                    | -----                                                    |
| Assistenza Infermieristica e Ricerca                      | Yes | Assistenza infermieristica e ricerca : AIR                                                                | -----                                                    |
| Australian Critical Care                                  | Yes | Australian critical care : official journal of the Confederation of Australian Critical Care Nurses       | -----                                                    |
| Australian Journal of Advanced Nursing                    | Yes | Australian critical care : official journal of the Confederation of Australian Critical Care Nurses       | -----                                                    |
| Australian Journal of Rural Health                        | Yes | The Australian journal of rural health                                                                    | -----                                                    |
| Bariatric Nursing and Surgical Patient Care               | No  | -----                                                                                                     | Journal now Bariatric Surgical Practice and Patient Care |
| Bariatric Surgical Practice and Patient Care              | Yes | Bariatric surgical practice and patient care                                                              | -----                                                    |
| Biological Research for Nursing                           | Yes | Biological research for nursing                                                                           | -----                                                    |
| Birth-Issues in Perinatal Care                            | Yes | Birth (Berkeley, Calif.)                                                                                  | -----                                                    |
| Cancer Nursing                                            | Yes | Cancer nursing                                                                                            | -----                                                    |

|                                                         |     |                                                                                                                                           |       |
|---------------------------------------------------------|-----|-------------------------------------------------------------------------------------------------------------------------------------------|-------|
| CIN-Computers Informatics Nursing                       | Yes | Computers, informatics, nursing : cin                                                                                                     | ----- |
| Clinical Journal of Oncology Nursing                    | Yes | Clinical journal of oncology nursing                                                                                                      | ----- |
| Clinical Nurse Specialist                               | Yes | Clinical nurse specialist cns                                                                                                             | ----- |
| Clinical Nursing Research                               | Yes | Clinical nursing research                                                                                                                 | ----- |
| Collegian                                               | Yes | Collegian (Royal College of Nursing, Australia)                                                                                           | ----- |
| Contemporary Nurse                                      | Yes | Contemporary nurse                                                                                                                        | ----- |
| Critical Care Nurse                                     | Yes | Critical care nurse                                                                                                                       | ----- |
| Critical Care Nursing Clinics of North America          | Yes | Critical care nursing clinics of North America                                                                                            | ----- |
| European Journal of Cancer Care                         | Yes | European journal of cancer care                                                                                                           | ----- |
| European Journal of Cardiovascular Nursing              | Yes | European journal of cardiovascular nursing : journal of the Working Group on Cardiovascular Nursing of the European Society of Cardiology | ----- |
| European Journal of Oncology Nursing                    | Yes | European journal of oncology nursing : the official journal of European Oncology Nursing Society                                          | ----- |
| Gastroenterology Nursing                                | Yes | Gastroenterology nursing : the official journal of the Society of Gastroenterology Nurses and Associates                                  | ----- |
| Geriatric Nursing                                       | Yes | Geriatric nursing (New York, N.Y.)                                                                                                        | ----- |
| Heart & Lung                                            | Yes | Heart & lung : the journal of critical care                                                                                               | ----- |
| Holistic Nursing Practice                               | Yes | Holistic nursing practice                                                                                                                 | ----- |
| International Emergency Nursing                         | Yes | International emergency nursing                                                                                                           | ----- |
| International Journal of Mental Health Nursing          | Yes | International journal of mental health nursing                                                                                            | ----- |
| International Journal of Nursing Knowledge              | Yes | International journal of nursing knowledge                                                                                                | ----- |
| International Journal of Nursing Practice               | Yes | International journal of nursing practice                                                                                                 | ----- |
| International Journal of Nursing Studies                | Yes | International journal of nursing studies                                                                                                  | ----- |
| International Nursing Review                            | Yes | International nursing review                                                                                                              | ----- |
| Janac-Journal of the Association of Nurses in Aids Care | Yes | The Journal of the Association of Nurses in AIDS Care : JANAC                                                                             | ----- |
| Japan Journal of Nursing Science                        | Yes | Japan journal of nursing science : JJNS                                                                                                   | ----- |

|                                                             |     |                                                                                                                          |       |
|-------------------------------------------------------------|-----|--------------------------------------------------------------------------------------------------------------------------|-------|
| Jognn-Journal of Obstetric Gynecologic and Neonatal Nursing | Yes | Journal of obstetric, gynecologic, and neonatal nursing : JOGNN / NAACOG                                                 | ----- |
| Journal for Specialists in Pediatric Nursing                | Yes | Journal for specialists in pediatric nursing : JSPN                                                                      | ----- |
| Journal of Addictions Nursing                               | Yes | Journal of addictions nursing                                                                                            | ----- |
| Journal of Advanced Nursing                                 | Yes | Journal of advanced nursing                                                                                              | ----- |
| Journal of Cardiovascular Nursing                           | Yes | The Journal of cardiovascular nursing                                                                                    | ----- |
| Journal of Child Health Care                                | Yes | Journal of child health care : for professionals working with children in the hospital and community                     | ----- |
| Journal of Clinical Nursing                                 | Yes | Journal of clinical nursing                                                                                              | ----- |
| Journal of Community Health Nursing                         | Yes | Journal of community health nursing                                                                                      | ----- |
| Journal of Continuing Education in Nursing                  | Yes | Journal of continuing education in nursing                                                                               | ----- |
| Journal of Emergency Nursing                                | Yes | Journal of emergency nursing: JEN : official publication of the Emergency Department Nurses Association                  | ----- |
| Journal of Family Nursing                                   | Yes | Journal of family nursing                                                                                                | ----- |
| Journal of Gerontological Nursing                           | Yes | Journal of gerontological nursing                                                                                        | ----- |
| Journal of Hospice & Palliative Nursing                     | Yes | Journal of hospice and palliative nursing : JHPN : the official journal of the Hospice and Palliative Nurses Association | ----- |
| Journal of Human Lactation                                  | Yes | Journal of human lactation : official journal of International Lactation Consultant Association                          | ----- |
| Journal of Korean Academy of Nursing                        | Yes | Journal of Korean Academy of Nursing                                                                                     | ----- |
| Journal of Midwifery & Womens Health                        | Yes | Journal of midwifery & women's health                                                                                    | ----- |
| Journal of Neuroscience Nursing                             | Yes | The Journal of neuroscience nursing : journal of the American Association of Neuroscience Nurses                         | ----- |
| Journal of Nursing Administration                           | Yes | The Journal of nursing administration                                                                                    | ----- |
| Journal of Nursing Care Quality                             | Yes | Journal of nursing care quality                                                                                          | ----- |
| Journal of Nursing Education                                | Yes | The Journal of nursing education                                                                                         | ----- |
| Journal of Nursing Management                               | Yes | Journal of nursing management                                                                                            | ----- |
| Journal of Nursing Research                                 | Yes | The journal of nursing research : JNR                                                                                    | ----- |
| Journal of Nursing Scholarship                              | Yes | Journal of nursing scholarship : an official publication of Sigma Theta                                                  | ----- |

|                                                                  |     |                                                                                                                                                   |                                                                           |
|------------------------------------------------------------------|-----|---------------------------------------------------------------------------------------------------------------------------------------------------|---------------------------------------------------------------------------|
|                                                                  |     | Tau International Honor Society of Nursing / Sigma Theta Tau                                                                                      |                                                                           |
| Journal of Pediatric Health Care                                 | Yes | Journal of pediatric health care : official publication of National Association of Pediatric Nurse Associates & Practitioners                     | -----                                                                     |
| Journal of Pediatric Nursing-Nursing Care of Children & Families | Yes | Journal of pediatric nursing                                                                                                                      | -----                                                                     |
| Journal of Pediatric Oncology Nursing                            | Yes | Journal of pediatric oncology nursing : official journal of the Association of Pediatric Oncology Nurses                                          | -----                                                                     |
| Journal of Perianesthesia Nursing                                | Yes | Journal of perianesthesia nursing : official journal of the American Society of PeriAnesthesia Nurses / American Society of PeriAnesthesia Nurses | -----                                                                     |
| Journal of Perinatal & Neonatal Nursing                          | Yes | The Journal of perinatal & neonatal nursing                                                                                                       | -----                                                                     |
| Journal of Professional Nursing                                  | Yes | Journal of professional nursing : official journal of the American Association of Colleges of Nursing                                             | -----                                                                     |
| Journal of Psychiatric and Mental Health Nursing                 | Yes | Journal of psychiatric and mental health nursing                                                                                                  | -----                                                                     |
| Journal of Psychosocial Nursing and Mental Health Services       | Yes | Journal of psychosocial nursing and mental health services                                                                                        | -----                                                                     |
| Journal of School Nursing                                        | Yes | The Journal of school nursing : the official publication of the National Association of School Nurses                                             | -----                                                                     |
| Journal of the American Academy of Nurse Practitioners           | No  | -----                                                                                                                                             | Journal now<br>Journal of the American Association of Nurse Practitioners |
| Journal of the American Association of Nurse Practitioners       | Yes | Journal of the American Association of Nurse Practitioners                                                                                        | -----                                                                     |
| Journal of the American Psychiatric Nurses Association           | Yes | Journal of the American Psychiatric Nurses Association                                                                                            | -----                                                                     |
| Journal of Tissue Viability                                      | Yes | Journal of tissue viability                                                                                                                       | -----                                                                     |
| Journal of Transcultural Nursing                                 | Yes | Journal of transcultural nursing : official journal of the Transcultural Nursing Society / Transcultural Nursing Society                          | -----                                                                     |

|                                                    |     |                                                                                                                                   |       |
|----------------------------------------------------|-----|-----------------------------------------------------------------------------------------------------------------------------------|-------|
| Journal of Wound Ostomy and Continence Nursing     | Yes | Journal of wound, ostomy, and continence nursing : official publication of The Wound, Ostomy and Continence Nurses Society / WOCN | ----- |
| MCN-The American Journal of Maternal-Child Nursing | Yes | McN. The American journal of maternal child nursing                                                                               | ----- |
| Midwifery                                          | Yes | Midwifery                                                                                                                         | ----- |
| Nephrology Nursing Journal                         | Yes | Nephrology nursing journal : journal of the American Nephrology Nurses' Association                                               | ----- |
| Nurse Education Today                              | Yes | Nurse education today                                                                                                             | ----- |
| Nurse Educator                                     | Yes | Nurse educator                                                                                                                    | ----- |
| Nursing & Health Sciences                          | Yes | Nursing & health sciences                                                                                                         | ----- |
| Nursing Clinics of North America                   | Yes | The Nursing clinics of North America                                                                                              | ----- |
| Nursing Economics                                  | Yes | Nursing economic\$                                                                                                                | ----- |
| Nursing Ethics                                     | Yes | Nursing ethics                                                                                                                    | ----- |
| Nursing in Critical Care                           | Yes | Nursing in critical care                                                                                                          | ----- |
| Nursing Inquiry                                    | Yes | Nursing inquiry                                                                                                                   | ----- |
| Nursing Outlook                                    | Yes | Nursing outlook                                                                                                                   | ----- |
| Nursing Philosophy                                 | Yes | Nursing philosophy : an international journal for healthcare professionals                                                        | ----- |
| Nursing Research                                   | Yes | Nursing research                                                                                                                  | ----- |
| Nursing Science Quarterly                          | Yes | Nursing science quarterly                                                                                                         | ----- |
| Oncology Nursing Forum                             | Yes | Oncology nursing forum                                                                                                            | ----- |
| Orthopaedic Nursing                                | Yes | Orthopedic nursing                                                                                                                | ----- |
| Pain Management Nursing                            | Yes | Pain management nursing : official journal of the American Society of Pain Management Nurses                                      | ----- |
| Perspectives in Psychiatric Care                   | Yes | Perspectives in psychiatric care                                                                                                  | ----- |
| Pflege                                             | Yes | Pflege                                                                                                                            | ----- |
| Public Health Nursing                              | Yes | Public health nursing (Boston, Mass.)                                                                                             | ----- |
| Rehabilitation Nursing                             | Yes | "Rehabilitation nursing : the official journal of the Association of Rehabilitation Nurses" <sup>a</sup>                          | ----- |
| Research and Theory for Nursing Practice           | Yes | Research and theory for nursing practice                                                                                          | ----- |
| Research in Gerontological Nursing                 | Yes | Research in gerontological nursing                                                                                                | ----- |
| Research in Nursing & Health                       | Yes | Research in nursing & health                                                                                                      | ----- |
| Revista da Escola de Enfermagem da Usp             | Yes | Revista da Escola de Enfermagem da U S P                                                                                          | ----- |
| Revista Latino-Americana de Enfermagem             | Yes | Revista latino-americana de enfermagem                                                                                            | ----- |



|                                                          |     |                                                                                                                                                                                                           |                     |
|----------------------------------------------------------|-----|-----------------------------------------------------------------------------------------------------------------------------------------------------------------------------------------------------------|---------------------|
| Western Journal of Nursing Research                      | Yes | Western journal of nursing research                                                                                                                                                                       | -----               |
| Women and Birth                                          | Yes | Women and birth : journal of the Australian College of Midwives                                                                                                                                           | -----               |
| Workplace Health & Safety                                | Yes | Workplace health & safety                                                                                                                                                                                 | -----               |
| Worldviews on Evidence-Based Nursing                     | Yes | Worldviews on evidence-based nursing / Sigma Theta Tau International, Honor Society of Nursing                                                                                                            | -----               |
| <b>Nutrition &amp; Dietetics</b>                         |     |                                                                                                                                                                                                           |                     |
| Acta Alimentaria                                         | No  | -----                                                                                                                                                                                                     | No PubMed citations |
| Advances in Nutrition                                    | Yes | Advances in nutrition (Bethesda, Md.)                                                                                                                                                                     | -----               |
| American Journal of Clinical Nutrition                   | Yes | The American journal of clinical nutrition                                                                                                                                                                | -----               |
| Annals of Nutrition and Metabolism                       | Yes | Annals of nutrition & metabolism                                                                                                                                                                          | -----               |
| Annual Review of Nutrition                               | Yes | Annual review of nutrition                                                                                                                                                                                | -----               |
| Appetite                                                 | Yes | Appetite <sup>a</sup>                                                                                                                                                                                     | -----               |
| Applied Physiology Nutrition and Metabolism              | Yes | Applied physiology, nutrition, and metabolism = Physiologie appliquée, nutrition et métabolisme                                                                                                           | -----               |
| Archivos Latinoamericanos de Nutricion                   | Yes | Archivos latinoamericanos de nutrición                                                                                                                                                                    | -----               |
| Asia Pacific Journal of Clinical Nutrition               | Yes | Asia Pacific journal of clinical nutrition                                                                                                                                                                | -----               |
| Beneficial Microbes                                      | Yes | Beneficial microbes                                                                                                                                                                                       | -----               |
| British Journal of Nutrition                             | Yes | The British journal of nutrition                                                                                                                                                                          | -----               |
| Canadian Journal of Dietetic Practice and Research       | Yes | Canadian journal of dietetic practice and research : a publication of Dietitians of Canada = Revue canadienne de la pratique et de la recherche en diététique : une publication des Diététistes du Canada | -----               |
| Clinical Nutrition                                       | Yes | Clinical nutrition (Edinburgh, Scotland)                                                                                                                                                                  | -----               |
| Critical Reviews in Food Science and Nutrition           | Yes | Critical reviews in food science and nutrition                                                                                                                                                            | -----               |
| Current Opinion in Clinical Nutrition and Metabolic Care | Yes | Current opinion in clinical nutrition and metabolic care                                                                                                                                                  | -----               |
| Current Topics in Nutraceutical Research                 | No  | -----                                                                                                                                                                                                     | No PubMed citations |

|                                                                     |     |                                                                                                                                                                                   |                     |
|---------------------------------------------------------------------|-----|-----------------------------------------------------------------------------------------------------------------------------------------------------------------------------------|---------------------|
| Ecology of Food and Nutrition                                       | Yes | Ecology of food and nutrition                                                                                                                                                     | -----               |
| Ernahrungs Umschau                                                  | No  | -----                                                                                                                                                                             | No PubMed citations |
| European Journal of Clinical Nutrition                              | Yes | European journal of clinical nutrition                                                                                                                                            | -----               |
| European Journal of Lipid Science and Technology                    | Yes | European journal of lipid science and technology : EJLST                                                                                                                          | -----               |
| European Journal of Nutrition                                       | Yes | European journal of nutrition                                                                                                                                                     | -----               |
| Food & Nutrition Research                                           | Yes | Food & nutrition research                                                                                                                                                         | -----               |
| Food and Drug Law Journal                                           | Yes | Food and drug law journal                                                                                                                                                         | -----               |
| Food and Nutrition Bulletin                                         | Yes | Food and nutrition bulletin                                                                                                                                                       | -----               |
| Food Chemistry                                                      | Yes | Food chemistry                                                                                                                                                                    | -----               |
| Food Policy                                                         | Yes | Food policy                                                                                                                                                                       | -----               |
| Food Reviews International                                          | No  | -----                                                                                                                                                                             | No PubMed citations |
| Genes and Nutrition                                                 | Yes | Genes & nutrition                                                                                                                                                                 | -----               |
| International Journal for Vitamin and Nutrition Research            | Yes | International journal for vitamin and nutrition research. Internationale zeitschrift für vitamin- und ernährungsforschung. Journal international de vitaminologie et de nutrition | -----               |
| International Journal of Behavioral Nutrition and Physical Activity | Yes | The international journal of behavioral nutrition and physical activity                                                                                                           | -----               |
| International Journal of Eating Disorders                           | Yes | The International journal of eating disorders <sup>a</sup>                                                                                                                        | -----               |
| International Journal of Food Sciences and Nutrition                | Yes | International journal of food sciences and nutrition                                                                                                                              | -----               |
| International Journal of Obesity                                    | Yes | International journal of obesity (2005)                                                                                                                                           | -----               |
| International Journal of Sport Nutrition and Exercise Metabolism    | Yes | International journal of sport nutrition and exercise metabolism                                                                                                                  | -----               |
| Journal of Clinical Biochemistry and Nutrition                      | Yes | Journal of clinical biochemistry and nutrition                                                                                                                                    | -----               |
| Journal of Human Nutrition and Dietetics                            | Yes | Journal of human nutrition and dietetics : the official journal of the British Dietetic Association                                                                               | -----               |
| Journal of Medicinal Food                                           | Yes | Journal of medicinal food                                                                                                                                                         | -----               |
| Journal of Nutrigenetics and Nutrigenomics                          | Yes | Journal of nutrigenetics and nutrigenomics                                                                                                                                        | -----               |
| Journal of Nutrition                                                | Yes | The Journal of nutrition                                                                                                                                                          | -----               |
| Journal of Nutrition Education and Behavior                         | Yes | Journal of nutrition education and behavior                                                                                                                                       | -----               |

|                                                          |     |                                                                                                                       |                     |
|----------------------------------------------------------|-----|-----------------------------------------------------------------------------------------------------------------------|---------------------|
| Journal of Nutrition Health & Aging                      | Yes | The journal of nutrition, health & aging                                                                              | -----               |
| Journal of Nutritional Biochemistry                      | Yes | The Journal of nutritional biochemistry                                                                               | -----               |
| Journal of Nutritional Science and Vitaminology          | Yes | Journal of nutritional science and vitaminology                                                                       | -----               |
| Journal of Parenteral and Enteral Nutrition              | Yes | Jpen. Journal of parenteral and enteral nutrition                                                                     | -----               |
| Journal of Pediatric Gastroenterology and Nutrition      | Yes | Journal of pediatric gastroenterology and nutrition                                                                   | -----               |
| Journal of Renal Nutrition                               | Yes | Journal of renal nutrition : the official journal of the Council on Renal Nutrition of the National Kidney Foundation | -----               |
| Journal of the Academy of Nutrition and Dietetics        | Yes | Journal of the Academy of Nutrition and Dietetics                                                                     | -----               |
| Journal of the American College of Nutrition             | Yes | Journal of the American College of Nutrition                                                                          | -----               |
| Journal of the International Society of Sports Nutrition | Yes | Journal of the International Society of Sports Nutrition                                                              | -----               |
| Lipids                                                   | Yes | Lipids                                                                                                                | -----               |
| Lipids in Health and Disease                             | Yes | Lipids in health and disease                                                                                          | -----               |
| Maternal and Child Nutrition                             | Yes | Maternal & child nutrition                                                                                            | -----               |
| Nutricion Hospitalaria                                   | Yes | Nutrición hospitalaria                                                                                                | -----               |
| Nutrients                                                | Yes | Nutrients                                                                                                             | -----               |
| Nutrition                                                | Yes | Nutrition (Burbank, Los Angeles County, Calif.)                                                                       | -----               |
| Nutrition & Diabetes                                     | Yes | Nutrition & diabetes                                                                                                  | -----               |
| Nutrition & Dietetics                                    | No  | -----                                                                                                                 | No PubMed citations |
| Nutrition & Metabolism                                   | Yes | Nutrition & metabolism                                                                                                | -----               |
| Nutrition and Cancer-An International Journal            | Yes | Nutrition and cancer                                                                                                  | -----               |
| Nutrition Clinique et Metabolisme                        | No  | -----                                                                                                                 | No PubMed citations |
| Nutrition in Clinical Practice                           | Yes | Nutrition in clinical practice : official publication of the American Society for Parenteral and Enteral Nutrition    | -----               |
| Nutrition Journal                                        | Yes | Nutrition journal                                                                                                     | -----               |
| Nutrition Metabolism and Cardiovascular Diseases         | Yes | Nutrition, metabolism, and cardiovascular diseases : NMCD                                                             | -----               |
| Nutrition Research                                       | Yes | Nutrition research (New York, N.Y.)                                                                                   | -----               |
| Nutrition Research and Practice                          | Yes | Nutrition research and practice                                                                                       | -----               |
| Nutrition Research Reviews                               | Yes | Nutrition research reviews                                                                                            | -----               |
| Nutrition Reviews                                        | Yes | Nutrition reviews                                                                                                     | -----               |

|                                                    |     |                                                                                                           |                     |
|----------------------------------------------------|-----|-----------------------------------------------------------------------------------------------------------|---------------------|
| Nutritional Neuroscience                           | Yes | Nutritional neuroscience                                                                                  | -----               |
| Obesity                                            | Yes | Obesity (Silver Spring, Md.)                                                                              | -----               |
| Obesity Facts                                      | Yes | Obesity facts                                                                                             | -----               |
| Obesity Research & Clinical Practice               | Yes | Obesity research & clinical practice                                                                      | -----               |
| Plant Foods for Human Nutrition                    | Yes | Plant foods for human nutrition (Dordrecht, Netherlands)                                                  | -----               |
| Proceedings of the Nutrition Society               | Yes | The Proceedings of the Nutrition Society                                                                  | -----               |
| Progress in Lipid Research                         | Yes | Progress in lipid research                                                                                | -----               |
| Progress in Nutrition                              | No  | -----                                                                                                     | No PubMed citations |
| Public Health Nutrition                            | Yes | Public health nutrition                                                                                   | -----               |
| Revista de Nutricao-Brazilian Journal of Nutrition | No  | -----                                                                                                     | No PubMed citations |
| <b>Psychology</b>                                  |     |                                                                                                           |                     |
| Anales de Psicologia                               | No  | -----                                                                                                     | No PubMed citations |
| Annales Medico-Psychologiques                      | No  | -----                                                                                                     | No PubMed citations |
| Annual Review of Clinical Psychology               | Yes | Annual review of clinical psychology                                                                      | -----               |
| Annual Review of Psychology                        | Yes | Annual review of psychology                                                                               | -----               |
| Applied Neuropsychology-Adult                      | Yes | Applied neuropsychology. Adult                                                                            | -----               |
| Applied Neuropsychology-Child                      | Yes | Applied neuropsychology. Child                                                                            | -----               |
| Archives of Clinical Neuropsychology               | Yes | Archives of clinical neuropsychology : the official journal of the National Academy of Neuropsychologists | -----               |
| Attention Perception & Psychophysics               | Yes | Attention, perception & psychophysics                                                                     | -----               |
| Biological Psychology                              | Yes | Biological psychology                                                                                     | -----               |
| Clinical Child Psychology and Psychiatry           | Yes | Clinical child psychology and psychiatry                                                                  | -----               |
| Clinical Neuropsychologist                         | Yes | The clinical neuropsychologist                                                                            | -----               |
| Clinical Psychologist                              | Yes | Clinical psychologist (Australian Psychological Society)                                                  | -----               |
| Cognitive Neuropsychology                          | Yes | Cognitive neuropsychology                                                                                 | -----               |
| Cognitive Psychology                               | Yes | Cognitive psychology                                                                                      | -----               |
| Depression and Anxiety                             | Yes | Depression and anxiety                                                                                    | -----               |
| Developmental Neuropsychology                      | Yes | Developmental neuropsychology                                                                             | -----               |
| Developmental Psychobiology                        | Yes | Developmental psychobiology                                                                               | -----               |

|                                                                     |     |                                                                                                                    |                     |
|---------------------------------------------------------------------|-----|--------------------------------------------------------------------------------------------------------------------|---------------------|
| Eating Disorders                                                    | Yes | Eating disorders                                                                                                   | -----               |
| Ergonomics                                                          | Yes | Ergonomics                                                                                                         | -----               |
| Experimental Aging Research                                         | Yes | Experimental aging research                                                                                        | -----               |
| Frontiers in Human Neuroscience                                     | Yes | Frontiers in human neuroscience                                                                                    | -----               |
| Geriatric et Psychologie Neuropsychiatrie de Vieillessement         | Yes | Gériatrie et psychologie neuropsychiatrie du vieillissement                                                        | -----               |
| Health Psychology                                                   | Yes | Health psychology : official journal of the Division of Health Psychology, American Psychological Association      | -----               |
| Human Factors                                                       | Yes | Human factors                                                                                                      | -----               |
| Human Movement Science                                              | Yes | Human movement science                                                                                             | -----               |
| Human Psychopharmacology-Clinical and Experimental                  | Yes | Human psychopharmacology                                                                                           | -----               |
| International Journal of Eating Disorders                           | Yes | The International journal of eating disorders <sup>a</sup>                                                         | -----               |
| International Journal of Psychophysiology                           | Yes | International journal of psychophysiology : official journal of the International Organization of Psychophysiology | -----               |
| International Journal of Sport Psychology                           | No  | -----                                                                                                              | No PubMed citations |
| International Psychogeriatrics                                      | Yes | International psychogeriatrics / IPA                                                                               | -----               |
| Journal of Applied Sport Psychology                                 | Yes | Journal of applied sport psychology                                                                                | -----               |
| Journal of Child Psychology and Psychiatry                          | Yes | Journal of child psychology and psychiatry, and allied disciplines                                                 | -----               |
| Journal of Clinical and Experimental Neuropsychology                | Yes | Journal of clinical and experimental neuropsychology                                                               | -----               |
| Journal of Comparative Psychology                                   | Yes | Journal of comparative psychology (Washington, D.C. : 1983) <sup>a</sup>                                           | -----               |
| Journal of Experimental Psychology-Animal Learning and Cognition    | Yes | Journal of experimental psychology. Animal learning and cognition <sup>a</sup>                                     | -----               |
| Journal of Experimental Psychology-Human Perception and Performance | Yes | Journal of experimental psychology. Human perception and performance                                               | -----               |
| Journal of Experimental Psychology-Learning Memory and Cognition    | Yes | Journal of experimental psychology. Learning, memory, and cognition                                                | -----               |
| Journal of Genetic Psychology                                       | Yes | The Journal of genetic psychology                                                                                  | -----               |
| Journal of Memory and Language                                      | Yes | Journal of memory and language                                                                                     | -----               |
| Journal of Motor Behavior                                           | Yes | Journal of motor behavior                                                                                          | -----               |

|                                                                             |     |                                                                                   |                     |
|-----------------------------------------------------------------------------|-----|-----------------------------------------------------------------------------------|---------------------|
| Journal of Neuropsychology                                                  | Yes | Journal of neuropsychology                                                        | -----               |
| Journal of Sport & Exercise Psychology                                      | Yes | Journal of sport & exercise psychology                                            | -----               |
| Journal of Studies on Alcohol and Drugs                                     | Yes | Journal of studies on alcohol and drugs                                           | -----               |
| Journal of the International Neuropsychological Society                     | Yes | Journal of the International Neuropsychological Society : JINS                    | -----               |
| Journals of Gerontology Series B-Psychological Sciences and Social Sciences | Yes | The journals of gerontology. Series B, Psychological sciences and social sciences | -----               |
| Multisensory Research                                                       | Yes | Multisensory research                                                             | -----               |
| Neurobiology of Learning and Memory                                         | Yes | Neurobiology of learning and memory                                               | -----               |
| Neurocase                                                                   | Yes | Neurocase                                                                         | -----               |
| Neuropsychobiology                                                          | Yes | Neuropsychobiology                                                                | -----               |
| Neuropsychological Rehabilitation                                           | Yes | Neuropsychological rehabilitation                                                 | -----               |
| Neuropsychology                                                             | Yes | Neuropsychology                                                                   | -----               |
| Perception                                                                  | Yes | Perception                                                                        | -----               |
| Pratiques Psychologiques                                                    | No  | -----                                                                             | No PubMed citations |
| Psycho-Oncologie                                                            | No  | -----                                                                             | No PubMed citations |
| Psycho-Oncology                                                             | Yes | Psycho-oncology                                                                   | -----               |
| Psychological Bulletin                                                      | Yes | Psychological bulletin                                                            | -----               |
| Psychological Medicine                                                      | Yes | Psychological medicine                                                            | -----               |
| Psychological Review                                                        | Yes | Psychological review                                                              | -----               |
| Psychology and Psychotherapy-Theory Research and Practice                   | Yes | Psychology and psychotherapy                                                      | -----               |
| Psychology of Sport and Exercise                                            | Yes | Psychology of sport and exercise                                                  | -----               |
| Psychophysiology                                                            | Yes | Psychophysiology                                                                  | -----               |
| Psychosomatic Medicine                                                      | Yes | Psychosomatic medicine                                                            | -----               |
| Psychosomatics                                                              | Yes | Psychosomatics                                                                    | -----               |
| Psychotherapy and Psychosomatics                                            | Yes | Psychotherapy and psychosomatics                                                  | -----               |
| Quarterly Journal of Experimental Psychology                                | Yes | Quarterly journal of experimental psychology (2006)                               | -----               |
| Research Quarterly for Exercise and Sport                                   | Yes | Research quarterly for exercise and sport                                         | -----               |
| Revista Argentina de Clinica Psicologica                                    | No  | -----                                                                             | No PubMed citations |
| Seeing and Perceiving                                                       | No  | -----                                                                             | No PubMed citations |

|                                                                              |     |                                                                                               |                     |
|------------------------------------------------------------------------------|-----|-----------------------------------------------------------------------------------------------|---------------------|
| Social Cognitive and Affective Neuroscience                                  | Yes | Social cognitive and affective neuroscience                                                   | -----               |
| Social Neuroscience                                                          | Yes | Social neuroscience                                                                           | -----               |
| Sport Psychologist                                                           | No  | -----                                                                                         | No PubMed citations |
| Stress and Health                                                            | Yes | Stress and health : journal of the International Society for the Investigation of Stress      | -----               |
| Substance Use & Misuse                                                       | Yes | Substance use & misuse                                                                        | -----               |
| Travail Humain                                                               | No  | -----                                                                                         | No PubMed citations |
| Zeitschrift fur Neuropsychologie                                             | No  | -----                                                                                         | No PubMed citations |
| Zeitschrift fur Psychosomatische Medizin und Psychotherapie                  | Yes | Zeitschrift für psychosomatische medizin und psychotherapie                                   | -----               |
| <b>Rehabilitation</b>                                                        |     |                                                                                               |                     |
| Adapted Physical Activity Quarterly                                          | Yes | Adapted physical activity quarterly : APAQ                                                    | -----               |
| American Journal of Physical Medicine & Rehabilitation                       | Yes | American journal of physical medicine & rehabilitation / Association of Academic Physiatrists | -----               |
| American Journal of Speech-Language Pathology                                | Yes | American journal of speech-language pathology / American Speech-Language-Hearing Association  | -----               |
| Archives of Physical Medicine and Rehabilitation                             | Yes | Archives of physical medicine and rehabilitation                                              | -----               |
| Australian Occupational Therapy Journal                                      | Yes | Australian occupational therapy journal                                                       | -----               |
| Brain Injury                                                                 | Yes | Brain injury                                                                                  | -----               |
| Brazilian Journal of Physical Therapy                                        | Yes | Brazilian journal of physical therapy                                                         | -----               |
| British Journal of Occupational Therapy                                      | Yes | The British journal of occupational therapy                                                   | -----               |
| Canadian Journal of Occupational Therapy-<br>Revue Canadienne D Ergotherapie | Yes | Canadian journal of occupational therapy. Revue canadienne d'ergothérapie                     | -----               |
| Clinical Linguistics & Phonetics                                             | Yes | Clinical linguistics & phonetics                                                              | -----               |
| Clinical Rehabilitation                                                      | Yes | Clinical rehabilitation                                                                       | -----               |
| Developmental Neurorehabilitation                                            | Yes | Developmental neurorehabilitation                                                             | -----               |
| Disability and Health Journal                                                | Yes | Disability and health journal                                                                 | -----               |

|                                                                    |     |                                                                                                                                                               |                     |
|--------------------------------------------------------------------|-----|---------------------------------------------------------------------------------------------------------------------------------------------------------------|---------------------|
| Disability and Rehabilitation                                      | Yes | Disability and rehabilitation                                                                                                                                 | -----               |
| European Journal of Cancer Care                                    | Yes | European journal of cancer care <sup>a</sup>                                                                                                                  | -----               |
| European Journal of Physical and Rehabilitation Medicine           | Yes | European journal of physical and rehabilitation medicine                                                                                                      | -----               |
| Folia Phoniatica et Logopaedica                                    | Yes | Folia phoniatica et logopaedica : official organ of the International Association of Logopedics and Phoniatics (IALP)                                         | -----               |
| Hong Kong Journal of Occupational Therapy                          | No  | -----                                                                                                                                                         | No PubMed citations |
| IEEE Transactions on Neural Systems and Rehabilitation Engineering | Yes | IEEE transactions on neural systems and rehabilitation engineering : a publication of the IEEE Engineering in Medicine and Biology Society                    | -----               |
| International Journal of Language & Communication Disorders        | Yes | International journal of language & communication disorders / Royal College of Speech & Language Therapists                                                   | -----               |
| International Journal of Osteopathic Medicine                      | No  | -----                                                                                                                                                         | No PubMed citations |
| International Journal of Rehabilitation Research                   | Yes | International journal of rehabilitation research. Internationale zeitschrift für rehabilitationsforschung. Revue internationale de recherches de réadaptation | -----               |
| International Journal of Speech-Language Pathology                 | Yes | International journal of speech-language pathology                                                                                                            | -----               |
| Journal of Back and Musculoskeletal Rehabilitation                 | Yes | Journal of back and musculoskeletal rehabilitation                                                                                                            | -----               |
| Journal of Communication Disorders                                 | Yes | Journal of communication disorders                                                                                                                            | -----               |
| Journal of Electromyography and Kinesiology                        | Yes | Journal of electromyography and kinesiology : official journal of the International Society of Electrophysiological Kinesiology                               | -----               |
| Journal of Fluency Disorders                                       | Yes | Journal of fluency disorders                                                                                                                                  | -----               |
| Journal of Geriatric Physical Therapy                              | Yes | Journal of geriatric physical therapy (2001)                                                                                                                  | -----               |
| Journal of Hand Therapy                                            | Yes | Journal of hand therapy : official journal of the American Society of Hand Therapists                                                                         | -----               |
| Journal of Head Trauma Rehabilitation                              | Yes | The Journal of head trauma rehabilitation                                                                                                                     | -----               |



|                                                               |     |                                                                                                                                 |                     |
|---------------------------------------------------------------|-----|---------------------------------------------------------------------------------------------------------------------------------|---------------------|
| Journal of Manipulative and Physiological Therapeutics        | Yes | Journal of manipulative and physiological therapeutics                                                                          | -----               |
| Journal of Musculoskeletal Pain                               | No  | -----                                                                                                                           | No PubMed citations |
| Journal of Neuroengineering and Rehabilitation                | Yes | Journal of neuroengineering and rehabilitation                                                                                  | -----               |
| Journal of Neurologic Physical Therapy                        | Yes | Journal of neurologic physical therapy : JNPT                                                                                   | -----               |
| Journal of Orthopaedic & Sports Physical Therapy              | Yes | The journal of orthopaedic and sports physical therapy                                                                          | -----               |
| Journal of Physical Therapy Science                           | Yes | Journal of physical therapy science                                                                                             | -----               |
| Journal of Physiotherapy                                      | Yes | Journal of physiotherapy                                                                                                        | -----               |
| Journal of Rehabilitation Medicine                            | Yes | Journal of rehabilitation medicine                                                                                              | -----               |
| Journal of Rehabilitation Research and Development            | Yes | Journal of rehabilitation research and development                                                                              | -----               |
| Journal of Speech Language and Hearing Research               | Yes | Journal of speech, language, and hearing research : JSLHR                                                                       | -----               |
| Journal of Sport Rehabilitation                               | Yes | Journal of sport rehabilitation                                                                                                 | -----               |
| Kinesiology                                                   | No  | -----                                                                                                                           | No PubMed citations |
| Manual Therapy                                                | Yes | Manual therapy                                                                                                                  | -----               |
| Neurorehabilitation                                           | Yes | NeuroRehabilitation                                                                                                             | -----               |
| Neurorehabilitation and Neural Repair                         | Yes | Neurorehabilitation and neural repair                                                                                           | -----               |
| Occupational Therapy International                            | Yes | Occupational therapy international                                                                                              | -----               |
| Pediatric Physical Therapy                                    | Yes | Pediatric physical therapy : the official publication of the Section on Pediatrics of the American Physical Therapy Association | -----               |
| Physical & Occupational Therapy in Pediatrics                 | Yes | Physical & occupational therapy in pediatrics                                                                                   | -----               |
| Physical Medicine and Rehabilitation Clinics of North America | Yes | Physical medicine and rehabilitation clinics of North America                                                                   | -----               |
| Physical Therapy                                              | Yes | Physical therapy                                                                                                                | -----               |
| Physical Therapy in Sport                                     | Yes | Physical therapy in sport : official journal of the Association of Chartered Physiotherapists in Sports Medicine                | -----               |
| Physikalische Medizin Rehabilitationsmedizin Kurortmedizin    | No  | -----                                                                                                                           | No PubMed citations |
| Physiotherapy                                                 | Yes | Physiotherapy                                                                                                                   | -----               |

|                                                                                                        |     |                                                                                                            |                     |
|--------------------------------------------------------------------------------------------------------|-----|------------------------------------------------------------------------------------------------------------|---------------------|
| Physiotherapy Canada                                                                                   | Yes | Physiotherapy Canada. Physiothérapie Canada                                                                | -----               |
| PM&R                                                                                                   | Yes | PM & R : the journal of injury, function, and rehabilitation                                               | -----               |
| Prosthetics and Orthotics International                                                                | Yes | Prosthetics and orthotics international                                                                    | -----               |
| Rehabilitation                                                                                         | Yes | Die Rehabilitation                                                                                         | -----               |
| Rehabilitation Nursing                                                                                 | Yes | Rehabilitation nursing : the official journal of the Association of Rehabilitation Nurses <sup>a</sup>     | -----               |
| Scandinavian Journal of Occupational Therapy                                                           | Yes | Scandinavian journal of occupational therapy                                                               | -----               |
| Seminars in Speech and Language                                                                        | Yes | Seminars in speech and language                                                                            | -----               |
| Spinal Cord                                                                                            | Yes | Spinal cord                                                                                                | -----               |
| Supportive Care in Cancer                                                                              | Yes | Supportive care in cancer : official journal of the Multinational Association of Supportive Care in Cancer | -----               |
| Topics in Stroke Rehabilitation                                                                        | Yes | Topics in stroke rehabilitation                                                                            | -----               |
| Turkiye Fiziksel Tip ve Rehabilitasyon Dergisi-Turkish Journal of Physical Medicine and Rehabilitation | No  | -----                                                                                                      | No PubMed citations |
| <b>Surgery</b>                                                                                         |     |                                                                                                            |                     |
| Acta Chirurgica Belgica                                                                                | Yes | Acta chirurgica Belgica                                                                                    | -----               |
| Acta Cirurgica Brasileira                                                                              | Yes | Acta cirúrgica brasileira / Sociedade Brasileira para Desenvolvimento Pesquisa em Cirurgia                 | -----               |
| Acta Neurochirurgica                                                                                   | Yes | Acta neurochirurgica                                                                                       | -----               |
| Advances in Skin & Wound Care                                                                          | Yes | Advances in skin & wound care                                                                              | -----               |
| Aesthetic Plastic Surgery                                                                              | Yes | Aesthetic plastic surgery                                                                                  | -----               |
| Aesthetic Surgery Journal                                                                              | Yes | Aesthetic surgery journal / the American Society for Aesthetic Plastic Surgery                             | -----               |
| American Journal of Surgery                                                                            | Yes | American journal of surgery                                                                                | -----               |
| American Journal of Surgical Pathology                                                                 | Yes | The American journal of surgical pathology                                                                 | -----               |
| American Journal of Transplantation                                                                    | Yes | American journal of transplantation : official journal of the American                                     | -----               |

|                                                             |     |                                                                                                                                                                                  |                                                     |
|-------------------------------------------------------------|-----|----------------------------------------------------------------------------------------------------------------------------------------------------------------------------------|-----------------------------------------------------|
|                                                             |     | Society of Transplantation and the American Society of Transplant Surgeons                                                                                                       |                                                     |
| American Surgeon                                            | Yes | The American surgeon                                                                                                                                                             | -----                                               |
| Annales de Chirurgie Plastique Esthetique                   | Yes | Annales de chirurgie plastique et esthétique                                                                                                                                     | -----                                               |
| Annali Italiani di Chirurgia                                | Yes | Annali italiani di chirurgia                                                                                                                                                     | -----                                               |
| Annals of Plastic Surgery                                   | Yes | Annals of plastic surgery                                                                                                                                                        | -----                                               |
| Annals of Surgery                                           | Yes | Annals of surgery                                                                                                                                                                | -----                                               |
| Annals of Surgical Oncology                                 | Yes | Annals of surgical oncology                                                                                                                                                      | -----                                               |
| Annals of Surgical Treatment and Research                   | Yes | Annals of surgical treatment and research                                                                                                                                        | -----                                               |
| Annals of the Royal College of Surgeons of England          | Yes | Annals of the Royal College of Surgeons of England                                                                                                                               | -----                                               |
| Annals of Thoracic and Cardiovascular Surgery               | Yes | Annals of thoracic and cardiovascular surgery : official journal of the Association of Thoracic and Cardiovascular Surgeons of Asia                                              | -----                                               |
| Annals of Thoracic Surgery                                  | Yes | The Annals of thoracic surgery                                                                                                                                                   | -----                                               |
| Annals of Transplantation                                   | Yes | Annals of transplantation                                                                                                                                                        | -----                                               |
| Annals of Vascular Surgery                                  | Yes | Annals of vascular surgery                                                                                                                                                       | -----                                               |
| ANZ Journal of Surgery                                      | Yes | ANZ journal of surgery                                                                                                                                                           | -----                                               |
| Archives of Facial Plastic Surgery                          | No  | -----                                                                                                                                                                            | Journal now JAMA Facial Plastic Surgery             |
| Archives of Orthopaedic and Trauma Surgery                  | Yes | Archives of orthopaedic and trauma surgery                                                                                                                                       | -----                                               |
| Archives of Otolaryngology-Head & Neck Surgery              | No  | -----                                                                                                                                                                            | Journal now JAMA Otolaryngology-Head & Neck Surgery |
| Archives of Surgery                                         | No  | -----                                                                                                                                                                            | Journal now JAMA Surgery.                           |
| Arthroscopy-The Journal of Arthroscopic and Related Surgery | Yes | Arthroscopy : the journal of arthroscopic & related surgery : official publication of the Arthroscopy Association of North America and the International Arthroscopy Association | -----                                               |
| Asian Journal of Surgery                                    | Yes | Asian journal of surgery / Asian Surgical Association                                                                                                                            | -----                                               |
| BMC Surgery                                                 | Yes | BMC surgery                                                                                                                                                                      | -----                                               |
| Bone & Joint Journal                                        | Yes | The bone & joint journal                                                                                                                                                         | -----                                               |
| British Journal of Neurosurgery                             | Yes | British journal of neurosurgery                                                                                                                                                  | -----                                               |

|                                                 |     |                                                                                                                |                                              |
|-------------------------------------------------|-----|----------------------------------------------------------------------------------------------------------------|----------------------------------------------|
| British Journal of Oral & Maxillofacial Surgery | Yes | The British journal of oral & maxillofacial surgery                                                            | -----                                        |
| British Journal of Surgery                      | Yes | The British journal of surgery                                                                                 | -----                                        |
| Burns                                           | Yes | Burns : journal of the International Society for Burn Injuries                                                 | -----                                        |
| Canadian Journal of Plastic Surgery             | No  | -----                                                                                                          | Journal now Plastic Surgery (Oakville, Ont.) |
| Canadian Journal of Surgery                     | Yes | Canadian journal of surgery. Journal canadien de chirurgie                                                     | -----                                        |
| Ceska a Slovenska Neurologie a Neurochirurgie   | No  | -----                                                                                                          | No PubMed citations                          |
| Childs Nervous System                           | Yes | Child's nervous system : ChNS : official journal of the International Society for Pediatric Neurosurgery       | -----                                        |
| Chirurg                                         | Yes | Der chirurg; zeitschrift für alle gebiete der operativen medizen                                               | -----                                        |
| Chirurgie de la Main                            | Yes | Chirurgie de la main                                                                                           | -----                                        |
| Cirugia Espanola                                | Yes | Cirugía española                                                                                               | -----                                        |
| Cirugia y Cirujanos                             | Yes | Cirugía y cirujanos                                                                                            | -----                                        |
| Cleft Palate-Craniofacial Journal               | Yes | Cleft palate-craniofacial journal : official publication of the American Cleft Palate-Craniofacial Association | -----                                        |
| Clinical Neurology and Neurosurgery             | Yes | Clinical neurology and neurosurgery                                                                            | -----                                        |
| Clinical Orthopaedics and Related Research      | Yes | Clinical orthopaedics and related research                                                                     | -----                                        |
| Clinical Transplantation                        | Yes | Clinical transplantation                                                                                       | -----                                        |
| Clinics in Plastic Surgery                      | Yes | Clinics in plastic surgery                                                                                     | -----                                        |
| Colorectal Disease                              | Yes | Colorectal disease : the official journal of the Association of Coloproctology of Great Britain and Ireland    | -----                                        |
| Computer Aided Surgery                          | Yes | Computer aided surgery : official journal of the International Society for Computer Aided Surgery              | -----                                        |
| Current Problems in Surgery                     | Yes | Current problems in surgery                                                                                    | -----                                        |
| Dermatologic Surgery                            | Yes | Dermatologic surgery : official publication for American Society for Dermatologic Surgery                      | -----                                        |
| Digestive Endoscopy                             | Yes | Digestive endoscopy : official journal of the Japan Gastroenterological Endoscopy Society                      | -----                                        |
| Digestive Surgery                               | Yes | Digestive surgery                                                                                              | -----                                        |
| Diseases of the Colon & Rectum                  | Yes | Diseases of the colon and rectum                                                                               | -----                                        |

|                                                                             |     |                                                                                                                                                                                                                                                                                           |                     |
|-----------------------------------------------------------------------------|-----|-------------------------------------------------------------------------------------------------------------------------------------------------------------------------------------------------------------------------------------------------------------------------------------------|---------------------|
| EJSO                                                                        | Yes | European journal of surgical oncology : the journal of the European Society of Surgical Oncology and the British Association of Surgical Oncology                                                                                                                                         | -----               |
| Eklem Hastalıkları ve Cerrahisi-Joint Diseases and Related Surgery          | Yes | Eklem hastalıkları ve cerrahisi = Joint diseases & related surgery                                                                                                                                                                                                                        | -----               |
| Endoscopy                                                                   | Yes | Endoscopy                                                                                                                                                                                                                                                                                 | -----               |
| Endoskopie Heute                                                            | No  | -----                                                                                                                                                                                                                                                                                     | No PubMed citations |
| European Journal of Cardio-Thoracic Surgery                                 | Yes | European journal of cardio-thoracic surgery : official journal of the European Association for Cardio-thoracic Surgery                                                                                                                                                                    | -----               |
| European Journal of Pediatric Surgery                                       | Yes | European journal of pediatric surgery : official journal of Austrian Association of Pediatric Surgery ... [et al] = Zeitschrift für kinderchirurgie                                                                                                                                       | -----               |
| European Journal of Vascular and Endovascular Surgery                       | Yes | European journal of vascular and endovascular surgery : the official journal of the European Society for Vascular Surgery                                                                                                                                                                 | -----               |
| European Surgery-Acta Chirurgica Austriaca                                  | Yes | European surgery : ACA : Acta chirurgica Austriaca                                                                                                                                                                                                                                        | -----               |
| European Surgical Research                                                  | Yes | European surgical research. Europäische chirurgische Forschung. Recherches chirurgicales européennes                                                                                                                                                                                      | -----               |
| Facial Plastic Surgery                                                      | Yes | Facial plastic surgery : FPS                                                                                                                                                                                                                                                              | -----               |
| Facial Plastic Surgery Clinics of North America                             | Yes | Facial plastic surgery clinics of North America                                                                                                                                                                                                                                           | -----               |
| Handchirurgie Mikrochirurgie Plastische Chirurgie                           | Yes | Handchirurgie, Mikrochirurgie, plastische Chirurgie : Organ der Deutschsprachigen Arbeitsgemeinschaft für Handchirurgie : Organ der Deutschsprachigen Arbeitsgemeinschaft für Mikrochirurgie der Peripheren Nerven und Gefäße : Organ der Vereinigung der Deutschen Plastischen Chirurgen | -----               |
| Head and Neck-Journal for the Sciences and Specialties of the Head and Neck | Yes | Head & neck                                                                                                                                                                                                                                                                               | -----               |
| Heart Surgery Forum                                                         | Yes | The heart surgery forum                                                                                                                                                                                                                                                                   | -----               |
| Hepato-Gastroenterology                                                     | Yes | Hepato-gastroenterology                                                                                                                                                                                                                                                                   | -----               |

|                                                                         |     |                                                                                         |                                       |
|-------------------------------------------------------------------------|-----|-----------------------------------------------------------------------------------------|---------------------------------------|
| Hernia                                                                  | Yes | Hernia : the journal of hernias and abdominal wall surgery                              | -----                                 |
| HPB                                                                     | Yes | HPB : the official journal of the International Hepato Pancreato Biliary Association    | -----                                 |
| Indian Journal of Surgery                                               | Yes | The Indian journal of surgery                                                           | -----                                 |
| Injury-International Journal of the Care of the Injured                 | Yes | Injury                                                                                  | -----                                 |
| International Journal of Colorectal Disease                             | Yes | International journal of colorectal disease                                             | -----                                 |
| International Journal of Computer Assisted Radiology and Surgery        | Yes | International journal of computer assisted radiology and surgery                        | -----                                 |
| International Journal of Lower Extremity Wounds                         | Yes | The international journal of lower extremity wounds                                     | -----                                 |
| International Journal of Medical Robotics and Computer Assisted Surgery | Yes | The international journal of medical robotics + computer assisted surgery : MRCAS       | -----                                 |
| International Journal of Oral and Maxillofacial Surgery                 | Yes | International journal of oral and maxillofacial surgery                                 | -----                                 |
| International Journal of Shoulder Surgery                               | Yes | International journal of shoulder surgery [electronic resource]                         | -----                                 |
| International Journal of Surgery                                        | Yes | International journal of surgery (London, England)                                      | -----                                 |
| International Journal of Surgical Pathology                             | Yes | International journal of surgical pathology                                             | -----                                 |
| International Surgery                                                   | Yes | International surgery                                                                   | -----                                 |
| International Wound Journal                                             | Yes | International wound journal                                                             | -----                                 |
| JAMA Facial Plastic Surgery                                             | Yes | JAMA facial plastic surgery                                                             | -----                                 |
| JAMA Surgery                                                            | Yes | JAMA surgery                                                                            | -----                                 |
| Journal of Bone and Joint Surgery-American Volume                       | Yes | The journal of bone and joint surgery. American volume                                  | -----                                 |
| Journal of Bone and Joint Surgery-British Volume                        | No  | -----                                                                                   | Journal now The Bone & Joint Journal. |
| Journal of Burn Care & Research                                         | Yes | Journal of burn care & research : official publication of the American Burn Association | -----                                 |
| Journal of Cardiac Surgery                                              | Yes | Journal of cardiac surgery                                                              | -----                                 |
| Journal of Cardiovascular Surgery                                       |     | The Journal of cardiovascular surgery                                                   | -----                                 |
| Journal of Cataract and Refractive Surgery                              | Yes | Journal of cataract and refractive surgery                                              | -----                                 |

|                                                                      |     |                                                                                                                                 |       |
|----------------------------------------------------------------------|-----|---------------------------------------------------------------------------------------------------------------------------------|-------|
| Journal of Cosmetic and Laser Therapy                                | Yes | Journal of cosmetic and laser therapy : official publication of the European Society for Laser Dermatology                      | ----- |
| Journal of Cranio-Maxillofacial Surgery                              | Yes | Journal of cranio-maxillo-facial surgery : official publication of the European Association for Cranio-Maxillo-Facial Surgery   | ----- |
| Journal of Craniofacial Surgery                                      | Yes | The journal of craniofacial surgery                                                                                             | ----- |
| Journal of Endovascular Therapy                                      | Yes | Journal of endovascular therapy : an official journal of the International Society of Endovascular Specialists                  | ----- |
| Journal of Foot & Ankle Surgery                                      | Yes | The journal of foot and ankle surgery : official publication of the American College of Foot and Ankle Surgeons                 | ----- |
| Journal of Gastrointestinal Surgery                                  | Yes | Journal of gastrointestinal surgery : official journal of the Society for Surgery of the Alimentary Tract                       | ----- |
| Journal of Hand Surgery- American Volume                             | Yes | The journal of hand surgery                                                                                                     | ----- |
| Journal of Hand Surgery- European Volume                             | Yes | The journal of hand surgery, European volume                                                                                    | ----- |
| Journal of Hand Therapy                                              | Yes | Journal of hand therapy : official journal of the American Society of Hand Therapists                                           | ----- |
| Journal of Heart and Lung Transplantation                            | Yes | The Journal of heart and lung transplantation : the official publication of the International Society for Heart Transplantation | ----- |
| Journal of Hepato-Biliary-Pancreatic Sciences                        | Yes | Journal of hepato-biliary-pancreatic sciences                                                                                   | ----- |
| Journal of Investigative Surgery                                     | Yes | Journal of investigative surgery : the official journal of the Academy of Surgical Research                                     | ----- |
| Journal of Korean Neurosurgical Society                              | Yes | Journal of Korean Neurosurgical Society                                                                                         | ----- |
| Journal of Laparoendoscopic & Advanced Surgical Techniques           | Yes | Journal of laparoendoscopic & advanced surgical techniques. Part A                                                              | ----- |
| Journal of Minimal Access Surgery                                    | Yes | Journal of minimal access surgery                                                                                               | ----- |
| Journal of Neurointerventional Surgery                               | Yes | Journal of neurointerventional surgery                                                                                          | ----- |
| Journal of Neurological Surgery Part A-Central European Neurosurgery | Yes | Journal of neurological surgery. Part A, Central European neurosurgery                                                          | ----- |

|                                                          |     |                                                                                                   |       |
|----------------------------------------------------------|-----|---------------------------------------------------------------------------------------------------|-------|
| Journal of Neurological Surgery Part B-Skull Base        | Yes | Journal of neurological surgery. Part B, Skull base                                               | ----- |
| Journal of Neurology Neurosurgery and Psychiatry         | Yes | Journal of neurology, neurosurgery, and psychiatry                                                | ----- |
| Journal of Neurosurgery                                  | Yes | Journal of neurosurgery                                                                           | ----- |
| Journal of Neurosurgery-Pediatrics                       | Yes | Journal of neurosurgery. Pediatrics                                                               | ----- |
| Journal of Neurosurgery-Spine                            | Yes | Journal of neurosurgery. Spine                                                                    | ----- |
| Journal of Neurosurgical Anesthesiology                  | Yes | Journal of neurosurgical anesthesiology                                                           | ----- |
| Journal of Neurosurgical Sciences                        | Yes | Journal of neurosurgical sciences                                                                 | ----- |
| Journal of Orthopaedic Surgery                           | Yes | Journal of orthopaedic surgery (Hong Kong)                                                        | ----- |
| Journal of Pediatric Surgery                             | Yes | Journal of pediatric surgery                                                                      | ----- |
| Journal of Plastic Reconstructive and Aesthetic Surgery  | Yes | Journal of plastic, reconstructive & aesthetic surgery : JPRAS                                    | ----- |
| Journal of Plastic Surgery and Hand Surgery              | Yes | Journal of plastic surgery and hand surgery                                                       | ----- |
| Journal of Reconstructive Microsurgery                   | Yes | Journal of reconstructive microsurgery                                                            | ----- |
| Journal of Refractive Surgery                            | Yes | Journal of refractive surgery (Thorofare, N.J. : 1995)                                            | ----- |
| Journal of Shoulder and Elbow Surgery                    | Yes | Journal of shoulder and elbow surgery / American Shoulder and Elbow Surgeons ... [et al.]         | ----- |
| Journal of Surgical Education                            | Yes | Journal of surgical education                                                                     | ----- |
| Journal of Surgical Oncology                             | Yes | Journal of surgical oncology                                                                      | ----- |
| Journal of Surgical Research                             | Yes | The journal of surgical research                                                                  | ----- |
| Journal of the American Academy of Orthopaedic Surgeons  | Yes | The journal of the American Academy of Orthopaedic Surgeons                                       | ----- |
| Journal of the American College of Surgeons              | Yes | Journal of the American College of Surgeons                                                       | ----- |
| Journal of the Korean Surgical Society                   | Yes | Annals of surgical treatment and research                                                         | ----- |
| Journal of Thoracic and Cardiovascular Surgery           | Yes | The Journal of thoracic and cardiovascular surgery                                                | ----- |
| Journal of Trauma and Acute Care Surgery                 | Yes | The journal of trauma and acute care surgery                                                      | ----- |
| Journal of Vascular Surgery                              | Yes | Journal of vascular surgery                                                                       | ----- |
| Journal of Visceral Surgery                              | Yes | Journal of visceral surgery                                                                       | ----- |
| Jsls-Journal of the Society of Laparoendoscopic Surgeons | Yes | JSLS : Journal of the Society of Laparoendoscopic Surgeons / Society of Laparoendoscopic Surgeons | ----- |



|                                                  |     |                                                                                                                                                              |                     |
|--------------------------------------------------|-----|--------------------------------------------------------------------------------------------------------------------------------------------------------------|---------------------|
| Knee                                             | Yes | The Knee                                                                                                                                                     | -----               |
| Knee Surgery Sports Traumatology Arthroscopy     | Yes | Knee surgery, sports traumatology, arthroscopy : official journal of the ESSKA                                                                               | -----               |
| Langenbecks Archives of Surgery                  | Yes | Langenbeck's archives of surgery / Deutsche gesellschaft für chirurgie                                                                                       | -----               |
| Lasers in Medical Science                        | Yes | Lasers in medical science                                                                                                                                    | -----               |
| Lasers in Surgery and Medicine                   | Yes | Lasers in surgery and medicine                                                                                                                               | -----               |
| Liver Transplantation                            | Yes | Liver transplantation : official publication of the American Association for the Study of Liver Diseases and the International Liver Transplantation Society | -----               |
| Minerva Chirurgica                               | Yes | Minerva chirurgica                                                                                                                                           | -----               |
| Minimally Invasive Therapy & Allied Technologies | Yes | Minimally invasive therapy & allied technologies : MITAT : official journal of the Society for Minimally Invasive Therapy                                    | -----               |
| Neurochirurgie                                   | Yes | Neuro-Chirurgie                                                                                                                                              | -----               |
| Neurocirugia                                     | Yes | Neurocirugía (Asturias, Spain)                                                                                                                               | -----               |
| Neurologia Medico-Chirurgica                     | Yes | Neurologia medico-chirurgica                                                                                                                                 | -----               |
| Neurosurgery                                     | Yes | Neurosurgery                                                                                                                                                 | -----               |
| Neurosurgery Clinics of North America            | Yes | Neurosurgery clinics of North America                                                                                                                        | -----               |
| Neurosurgical Focus                              | Yes | Neurosurgical focus                                                                                                                                          | -----               |
| Neurosurgical Review                             | Yes | Neurosurgical review                                                                                                                                         | -----               |
| Obesity Surgery                                  | Yes | Obesity surgery                                                                                                                                              | -----               |
| Operative Techniques in Sports Medicine          | No  | -----                                                                                                                                                        | No PubMed citations |
| Ophthalmic Plastic and Reconstructive Surgery    | Yes | Ophthalmic plastic and reconstructive surgery                                                                                                                | -----               |
| Ophthalmic Surgery Lasers & Imaging Retina       | Yes | Ophthalmic surgery, lasers & imaging retina                                                                                                                  | -----               |
| Orthopaedics & Traumatology-Surgery & Research   | Yes | Orthopaedics & traumatology, surgery & research : OTSR                                                                                                       | -----               |
| Ostomy Wound Management                          | Yes | Ostomy/wound management                                                                                                                                      | -----               |
| Otolaryngology-Head and Neck Surgery             | Yes | JAMA otolaryngology-- head & neck surgery                                                                                                                    | -----               |
| Pediatric Neurosurgery                           | Yes | Pediatric neurosurgery                                                                                                                                       | -----               |
| Pediatric Surgery International                  | Yes | Pediatric surgery international                                                                                                                              | -----               |
| Photomedicine and Laser Surgery                  | Yes | Photomedicine and laser surgery                                                                                                                              | -----               |
| Plastic and Reconstructive Surgery               | Yes | Plastic and reconstructive surgery                                                                                                                           | -----               |
| Plastic Surgery                                  | Yes | Plastic surgery (Oakville, Ont.)                                                                                                                             | -----               |

|                                                                            |     |                                                                                                                               |                     |
|----------------------------------------------------------------------------|-----|-------------------------------------------------------------------------------------------------------------------------------|---------------------|
| Progress in Transplantation                                                | Yes | Progress in transplantation (Aliso Viejo, Calif.)                                                                             | -----               |
| Revista Brasileira de Cirurgia Cardiovascular                              | No  | -----                                                                                                                         | No PubMed citations |
| Scandinavian Journal of Surgery                                            | Yes | Scandinavian journal of surgery : SJS : official organ for the Finnish Surgical Society and the Scandinavian Surgical Society | -----               |
| Seminars in Cutaneous Medicine and Surgery                                 | Yes | Seminars in cutaneous medicine and surgery                                                                                    | -----               |
| Seminars in Pediatric Surgery                                              | Yes | Seminars in pediatric surgery                                                                                                 | -----               |
| Seminars in Vascular Surgery                                               | Yes | Seminars in vascular surgery                                                                                                  | -----               |
| Shock                                                                      | Yes | Shock (Augusta, Ga.)                                                                                                          | -----               |
| South African Journal of Surgery                                           | Yes | South African journal of surgery. Suid-Afrikaanse tydskrif vir chirurgie                                                      | -----               |
| Stereotactic and Functional Neurosurgery                                   | Yes | Stereotactic and functional neurosurgery                                                                                      | -----               |
| Surgeon-Journal of the Royal Colleges of Surgeons of Edinburgh and Ireland | Yes | The surgeon : journal of the Royal Colleges of Surgeons of Edinburgh and Ireland                                              | -----               |
| Surgery                                                                    | Yes | Surgery                                                                                                                       | -----               |
| Surgery for Obesity and Related Diseases                                   | Yes | Surgery for obesity and related diseases : official journal of the American Society for Bariatric Surgery                     | -----               |
| Surgery Today                                                              | Yes | Surgery today                                                                                                                 | -----               |
| Surgical and Radiologic Anatomy                                            | Yes | Surgical and radiologic anatomy : SRA                                                                                         | -----               |
| Surgical Clinics of North America                                          | Yes | The Surgical clinics of North America                                                                                         | -----               |
| Surgical Endoscopy and other Interventional Techniques                     | Yes | Surgical endoscopy                                                                                                            | -----               |
| Surgical Infections                                                        | Yes | Surgical infections                                                                                                           | -----               |
| Surgical Innovation                                                        | Yes | Surgical innovation                                                                                                           | -----               |
| Surgical Laparoscopy Endoscopy & Percutaneous Techniques                   | Yes | Surgical laparoscopy, endoscopy & percutaneous techniques                                                                     | -----               |
| Surgical Oncology Clinics of North America                                 | Yes | Surgical oncology clinics of North America                                                                                    | -----               |
| Surgical Oncology-Oxford                                                   | Yes | Surgical oncology                                                                                                             | -----               |
| Techniques in Coloproctology                                               | Yes | Techniques in coloproctology                                                                                                  | -----               |
| Thoracic and Cardiovascular Surgeon                                        | Yes | The Thoracic and cardiovascular surgeon                                                                                       | -----               |
| Thoracic Surgery Clinics                                                   | Yes | Thoracic surgery clinics                                                                                                      | -----               |

|                                                                                                |     |                                                                                                                            |                     |
|------------------------------------------------------------------------------------------------|-----|----------------------------------------------------------------------------------------------------------------------------|---------------------|
| Transplant International                                                                       | Yes | Transplant international : official journal of the European Society for Organ Transplantation                              | -----               |
| Transplantation                                                                                | Yes | Transplantation                                                                                                            | -----               |
| Transplantation Proceedings                                                                    | Yes | Transplantation proceedings                                                                                                | -----               |
| Turk Gogus Kalp Damar Cerrahisi Dergisi-Turkish Journal of Thoracic and Cardiovascular Surgery | No  | -----                                                                                                                      | No PubMed citations |
| Turkish Neurosurgery                                                                           | Yes | Turkish neurosurgery                                                                                                       | -----               |
| Unfallchirurg                                                                                  | Yes | Der unfallchirurg                                                                                                          | -----               |
| Vascular and Endovascular Surgery                                                              | Yes | Vascular and endovascular surgery                                                                                          | -----               |
| World Journal of Emergency Surgery                                                             | Yes | World journal of emergency surgery : WJES                                                                                  | -----               |
| World Journal of Surgery                                                                       | Yes | World journal of surgery                                                                                                   | -----               |
| World Journal of Surgical Oncology                                                             | Yes | World journal of surgical oncology                                                                                         | -----               |
| World Neurosurgery                                                                             | Yes | World neurosurgery                                                                                                         | -----               |
| Wound Repair and Regeneration                                                                  | Yes | Wound repair and regeneration : official publication of the Wound Healing Society [and] the European Tissue Repair Society | -----               |
| Wounds-A Compendium of Clinical Research and Practice                                          | Yes | Wounds : a compendium of clinical research and practice                                                                    | -----               |
| Zentralblatt für Chirurgie                                                                     | Yes | Zentralblatt für Chirurgie                                                                                                 | -----               |

<sup>a</sup>The same journal appears in two categories in Web of Science for the following journals: Journal of Comparative Psychology (Behavioral Sciences, Psychology), Journal of Experimental Psychology. Animal Learning and Cognition (Behavioral Sciences, Psychology), Appetite (Behavioral Sciences, Nutrition & Dietetics), International Journal of Eating Disorders: (Nutrition and Dietetics, Psychology), European Journal of Cancer Care (Nursing, Rehabilitation), Rehabilitation Nursing (Nursing, Rehabilitation).

**eTable 2.** PubMed Search Terms

((random\*[Title/Abstract] OR "RCT"[Title/Abstract] NOT ("Drug Therapy"[Mesh] OR "drug therapy"[Subheading] OR "Pharmaceutical Preparations"[Mesh] OR Review[ptyp] OR "meta-analysis"[Title] OR "systematic review"[Title])))

AND

("Acta chirurgica Belgica"[Journal] OR "Acta cirúrgica brasileira / Sociedade Brasileira para Desenvolvimento Pesquisa em Cirurgia"[Journal] OR "Acta ethologica"[Journal] OR "Acta neurochirurgica"[Journal] OR "Adapted physical activity quarterly : APAQ"[Journal] OR "Advances in neonatal care : official journal of the National Association of Neonatal Nurses"[Journal] OR "Advances in nutrition (Bethesda, Md.)"[Journal] OR "Advances in skin & wound care"[Journal] OR "Aesthetic plastic surgery"[Journal] OR "Aesthetic surgery journal / the American Society for Aesthetic Plastic Surgery"[Journal] OR "Aggressive behavior"[Journal] OR "American journal of critical care : an official publication, American Association of Critical-Care Nurses"[Journal] OR "American journal of physical medicine & rehabilitation / Association of Academic Physiatrists"[Journal] OR "American journal of speech-language pathology / American Speech-Language-Hearing Association"[Journal] OR "American journal of surgery"[Journal] OR "American journal of transplantation : official journal of the American Society of Transplantation and the American Society of Transplant Surgeons"[Journal] OR "Animal behaviour"[Journal] OR "Animal cognition"[Journal] OR "Annales de chirurgie plastique et esthétique"[Journal] OR "Annali italiani di chirurgia"[Journal] OR "Annals of nutrition & metabolism"[Journal] OR "Annals of plastic surgery"[Journal] OR "Annals of surgery"[Journal] OR "Annals of surgical oncology"[Journal] OR "Annals of surgical treatment and research"[Journal] OR "Annals of the Royal College of Surgeons of England"[Journal] OR "Annals of thoracic and cardiovascular surgery : official journal of the Association of Thoracic and Cardiovascular Surgeons of Asia"[Journal] OR "Annals of transplantation"[Journal] OR "Annals of vascular surgery"[Journal] OR "Annual review of clinical psychology"[Journal] OR "Annual review of nutrition"[Journal] OR "Annual review of psychology"[Journal] OR "ANS. Advances in nursing science"[Journal] OR "ANZ journal of surgery"[Journal] OR "Appetite"[Journal] OR "Applied animal behaviour science"[Journal] OR "Applied neuropsychology. Adult"[Journal] OR "Applied neuropsychology. Child"[Journal] OR "Applied nursing research : ANR"[Journal] OR "Applied physiology, nutrition, and metabolism = Physiologie appliquée, nutrition et métabolisme"[Journal] OR "Archives of clinical neuropsychology : the official journal of the National Academy of Neuropsychologists"[Journal] OR "Archives of orthopaedic and trauma surgery"[Journal] OR "Archives of physical medicine and rehabilitation"[Journal] OR "Archives of psychiatric nursing"[Journal] OR "Archivos latinoamericanos de nutrición"[Journal] OR "Arthroscopy : the journal of arthroscopic & related surgery : official publication of the Arthroscopy Association of North America and the International Arthroscopy Association"[Journal] OR "Asia pacific journal of clinical nutrition"[Journal] OR "Asian journal of surgery / Asian Surgical Association"[Journal] OR "Asian nursing research"[Journal] OR "Assistenza infermieristica e ricerca : AIR"[Journal] OR "Attention, perception & psychophysics"[Journal] OR "Australian critical care : official

journal of the Confederation of Australian Critical Care Nurses"[Journal] OR "Australian occupational therapy journal"[Journal] OR "Autism research : official journal of the International Society for Autism Research"[Journal] OR "Bariatric surgical practice and patient care"[Journal] OR "Behavior genetics"[Journal] OR "Behavioral and brain functions : BBF"[Journal] OR "Behavioral ecology : official journal of the International Society for Behavioral Ecology"[Journal] OR "Behavioral ecology and sociobiology"[Journal] OR "Behavioral medicine (Washington, D.C.)"[Journal] OR "Behavioral neuroscience"[Journal] OR "Behaviour"[Journal] OR "Behavioural brain research"[Journal] OR "Behavioural pharmacology"[Journal] OR "Behavioural processes"[Journal] OR "Beneficial microbes"[Journal] OR "Biological psychology"[Journal] OR "Biological research for nursing"[Journal] OR "Birth (Berkeley, Calif.)"[Journal] OR "BMC surgery"[Journal] OR "Brain and behavior"[Journal] OR "Brain injury"[Journal] OR "Brain, behavior and evolution"[Journal] OR "Brazilian journal of physical therapy"[Journal] OR "British journal of neurosurgery"[Journal] OR "Burns : journal of the International Society for Burn Injuries"[Journal] OR "Canadian journal of dietetic practice and research : a publication of Dietitians of Canada = Revue canadienne de la pratique et de la recherche en diététique : une publication des Diététistes du Canada"[Journal] OR "Canadian journal of occupational therapy. Revue canadienne d'ergothérapie"[Journal] OR "Canadian journal of surgery. Journal canadien de chirurgie"[Journal] OR "Cancer nursing"[Journal] OR "Chemical senses"[Journal] OR "Child's nervous system : ChNS : official journal of the International Society for Pediatric neurosurgery"[Journal] OR "Chirurgie de la main"[Journal] OR "Cirugía española"[Journal] OR "Cirugía y cirujanos"[Journal] OR "Clinical child psychology and psychiatry"[Journal] OR "Clinical journal of oncology nursing"[Journal] OR "Clinical linguistics & phonetics"[Journal] OR "Clinical neurology and neurosurgery"[Journal] OR "Clinical nurse specialist cns"[Journal] OR "Clinical nursing research"[Journal] OR "Clinical nutrition (Edinburgh, Scotland)"[Journal] OR "Clinical orthopaedics and related research"[Journal] OR "Clinical rehabilitation"[Journal] OR "Clinical transplantation"[Journal] OR "Clinics in plastic surgery"[Journal] OR "Cognitive and behavioral neurology : official journal of the Society for Behavioral and Cognitive Neurology"[Journal] OR "Cognitive neuropsychology"[Journal] OR "Cognitive psychology"[Journal] OR "Cognitive, affective & behavioral neuroscience"[Journal] OR "Collegian (Royal College of Nursing, Australia)"[Journal] OR "Colorectal disease : the official journal of the Association of Coloproctology of Great Britain and Ireland"[Journal] OR "Computer aided surgery : official journal of the International Society for Computer Aided Surgery"[Journal] OR "Computers, informatics, nursing : cin"[Journal] OR "Contemporary nurse"[Journal] OR "Cortex"[Journal] OR "Critical care nurse"[Journal] OR "Critical care nursing clinics of north america"[Journal] OR "Critical reviews in food science and nutrition"[Journal] OR "Current opinion in clinical nutrition and metabolic care"[Journal] OR "Current problems in surgery"[Journal] OR "Depression and anxiety"[Journal] OR "Der chirurg; zeitschrift für alle gebiete der operativen medizen"[Journal] OR "Der unfallchirurg"[Journal] OR "Dermatologic surgery : official publication for American Society for Dermatologic Surgery [et al.]"[Journal] OR "Developmental neuropsychology"[Journal] OR "Developmental neurorehabilitation"[Journal] OR "Developmental psychobiology"[Journal] OR "Die rehabilitation"[Journal] OR "Digestive endoscopy : official journal of the Japan Gastroenterological Endoscopy Society"[Journal] OR "Digestive surgery"[Journal] OR "Disability and health journal"[Journal] OR "Disability and rehabilitation"[Journal] OR "Diseases of the colon and rectum"[Journal] OR "Eating

disorders"[Journal] OR "Ecology of food and nutrition"[Journal] OR "Eklem hastalıkları ve cerrahisi = joint diseases & related surgery"[Journal] OR "Endoscopy"[Journal] OR "Epilepsy & behavior : E&B"[Journal] OR "Ergonomics"[Journal] OR "Ethology : formerly zeitschrift für tierpsychologie"[Journal] OR "Ethology, ecology & evolution"[Journal] OR "European journal of cancer care"[Journal] OR "European journal of cardio-thoracic surgery : official journal of the European Association for Cardio-thoracic Surgery"[Journal] OR "European journal of cardiovascular nursing : journal of the Working Group on Cardiovascular Nursing of the European Society of Cardiology"[Journal] OR "European journal of clinical nutrition"[Journal] OR "European journal of lipid science and technology : EJLST"[Journal] OR "European journal of nutrition"[Journal] OR "European journal of oncology nursing : the official journal of European Oncology Nursing Society"[Journal] OR "European journal of pediatric surgery : official journal of Austrian Association of Pediatric Surgery ... [et al] = Zeitschrift für kinderchirurgie"[Journal] OR "European journal of physical and rehabilitation medicine"[Journal] OR "European journal of surgical oncology : the journal of the European Society of Surgical Oncology and the British Association of Surgical Oncology"[Journal] OR "European journal of vascular and endovascular surgery : the official journal of the European Society for Vascular Surgery"[Journal] OR "European surgery : ACA : Acta chirurgica Austriaca"[Journal] OR "European surgical research. Europäische chirurgische Forschung. Recherches chirurgicales européennes"[Journal] OR "Evolution and human behavior : official journal of the Human Behavior and Evolution Society"[Journal] OR "Experimental aging research"[Journal] OR "Facial plastic surgery : FPS"[Journal] OR "Facial plastic surgery clinics of north america"[Journal] OR "Folia phoniatica et logopaedica : official organ of the International Association of Logopedics and Phoniatics (IALP)"[Journal] OR "Food & nutrition research"[Journal] OR "Food and drug law journal"[Journal] OR "Food and nutrition bulletin"[Journal] OR "Food chemistry"[Journal] OR "Food policy"[Journal] OR "Frontiers in behavioral neuroscience"[Journal] OR "Frontiers in human neuroscience"[Journal] OR "Gastroenterology nursing : the official journal of the Society of Gastroenterology Nurses and Associates"[Journal] OR "Genes & nutrition"[Journal] OR "Genes, brain, and behavior"[Journal] OR "Geriatric nursing (New York, N.Y.)"[Journal] OR "Gériatrie et psychologie neuropsychiatrie du vieillissement"[Journal] OR "Handchirurgie, Mikrochirurgie, plastische Chirurgie : Organ der Deutschsprachigen Arbeitsgemeinschaft für Handchirurgie : Organ der Deutschsprachigen Arbeitsgemeinschaft für Mikrochirurgie der Peripheren Nerven und Gefäße : Organ der Vereinigung der Deutschen Plastischen Chirurgen"[Journal] OR "Head & neck"[Journal] OR "Health psychology : official journal of the Division of Health Psychology, American Psychological Association"[Journal] OR "Heart & lung : the journal of critical care"[Journal] OR "Hepatogastroenterology"[Journal] OR "Hernia"[Journal] OR "Holistic nursing practice"[Journal] OR "Hormones and behavior"[Journal] OR "HPB : the official journal of the International Hepato Pancreato Biliary Association"[Journal] OR "Human factors"[Journal] OR "Human movement science"[Journal] OR "Human psychopharmacology"[Journal] OR "IEEE transactions on neural systems and rehabilitation engineering : a publication of the IEEE Engineering in Medicine and Biology Society"[Journal] OR "Injury"[Journal] OR "International emergency nursing"[Journal] OR "International journal for vitamin and nutrition research. Internationale zeitschrift für vitamin- und ernährungsforschung. Journal international de vitaminologie et de nutrition"[Journal] OR "International journal of colorectal disease"[Journal] OR "International journal of computer assisted radiology and surgery"[Journal] OR "International journal of food sciences and

nutrition"[Journal] OR "International journal of language & communication disorders / Royal College of Speech & Language Therapists"[Journal] OR "International journal of mental health nursing"[Journal] OR "International journal of nursing knowledge"[Journal] OR "International journal of nursing practice"[Journal] OR "International journal of nursing studies"[Journal] OR "International journal of obesity (2005)"[Journal] OR "International journal of oral and maxillofacial surgery"[Journal] OR "International journal of psychophysiology : official journal of the International Organization of Psychophysiology"[Journal] OR "International journal of rehabilitation research. Internationale zeitschrift für rehabilitationsforschung. Revue internationale de recherches de réadaptation"[Journal] OR "International journal of shoulder surgery"[Journal] OR "International journal of speech-language pathology"[Journal] OR "International journal of sport nutrition and exercise metabolism"[Journal] OR "International journal of surgery (London, England)"[Journal] OR "International journal of surgical pathology"[Journal] OR "International nursing review"[Journal] OR "International psychogeriatrics / IPA"[Journal] OR "International surgery"[Journal] OR "International wound journal"[Journal] OR "Jama facial plastic surgery"[Journal] OR "JAMA otolaryngology-head & neck surgery"[Journal] OR "JAMA surgery"[Journal] OR "Japan journal of nursing science : JJNS"[Journal] OR "Journal for specialists in pediatric nursing : JSPN"[Journal] OR "Journal of addictions nursing"[Journal] OR "Journal of advanced nursing"[Journal] OR "Journal of applied sport psychology"[Journal] OR "Journal of back and musculoskeletal rehabilitation"[Journal] OR "Journal of burn care & research : official publication of the American Burn Association"[Journal] OR "Journal of cardiac surgery"[Journal] OR "Journal of cataract and refractive surgery"[Journal] OR "Journal of child health care : for professionals working with children in the hospital and community"[Journal] OR "Journal of child psychology and psychiatry, and allied disciplines"[Journal] OR "Journal of clinical and experimental neuropsychology"[Journal] OR "Journal of clinical biochemistry and nutrition"[Journal] OR "Journal of clinical nursing"[Journal] OR "Journal of communication disorders"[Journal] OR "Journal of community health nursing"[Journal] OR "Journal of comparative physiology. A, Neuroethology, sensory, neural, and behavioral physiology"[Journal] OR "Journal of comparative psychology (Washington, D.C. : 1983)"[Journal] OR "Journal of continuing education in nursing"[Journal] OR "Journal of cosmetic and laser therapy : official publication of the European Society for Laser Dermatology"[Journal] OR "Journal of cranio-maxillofacial surgery : official publication of the European Association for Cranio-Maxillo-Facial Surgery"[Journal] OR "Journal of developmental and behavioral pediatrics : JDBP"[Journal] OR "Journal of electromyography and kinesiology : official journal of the International Society of Electrophysiological Kinesiology"[Journal] OR "Journal of emergency nursing: JEN : official publication of the Emergency Department Nurses Association"[Journal] OR "Journal of endovascular therapy : an official journal of the International Society of Endovascular Specialists"[Journal] OR "Journal of experimental psychology. Animal learning and cognition"[Journal] OR "Journal of experimental psychology. Human perception and performance"[Journal] OR "Journal of experimental psychology. Learning, memory, and cognition"[Journal] OR "Journal of family nursing"[Journal] OR "Journal of fluency disorders"[Journal] OR "Journal of gastrointestinal surgery : official journal of the Society for Surgery of the Alimentary Tract"[Journal] OR "Journal of geriatric physical therapy (2001)"[Journal] OR "Journal of gerontological nursing"[Journal] OR "Journal of hand therapy : official journal of the American Society of Hand Therapists"[Journal] OR "Journal of

hepato-biliary-pancreatic sciences"[Journal] OR "Journal of hospice and palliative nursing : jhpn : the official journal of the hospice and palliative nurses association"[Journal] OR "Journal of human lactation : official journal of International Lactation Consultant Association"[Journal] OR "Journal of human nutrition and dietetics : the official journal of the British Dietetic Association"[Journal] OR "Journal of investigative surgery : the official journal of the Academy of Surgical Research"[Journal] OR "Journal of korean academy of nursing"[Journal] OR "Journal of korean neurosurgical society"[Journal] OR "Journal of laparoendoscopic & advanced surgical techniques. Part A"[Journal] OR "Journal of manipulative and physiological therapeutics"[Journal] OR "Journal of medicinal food"[Journal] OR "Journal of memory and language"[Journal] OR "Journal of midwifery & women's health"[Journal] OR "Journal of minimal access surgery"[Journal] OR "Journal of motor behavior"[Journal] OR "Journal of neuroengineering and rehabilitation"[Journal] OR "Journal of neurointerventional surgery"[Journal] OR "Journal of neurologic physical therapy : JNPT"[Journal] OR "Journal of neurological surgery. Part A, Central European neurosurgery"[Journal] OR "Journal of neurological surgery. Part B, Skull base"[Journal] OR "Journal of neurology, neurosurgery, and psychiatry"[Journal] OR "Journal of neuropsychology"[Journal] OR "Journal of neurosurgery"[Journal] OR "Journal of neurosurgery. Pediatrics"[Journal] OR "Journal of neurosurgery. Spine"[Journal] OR "Journal of neurosurgical anesthesiology"[Journal] OR "Journal of neurosurgical sciences"[Journal] OR "Journal of nursing care quality"[Journal] OR "Journal of nursing management"[Journal] OR "Journal of nursing scholarship : an official publication of Sigma Theta Tau International Honor Society of Nursing / Sigma Theta Tau"[Journal] OR "Journal of nutrigenetics and nutrigenomics"[Journal] OR "Journal of nutrition education and behavior"[Journal] OR "Journal of nutritional science and vitaminology"[Journal] OR "Journal of obstetric, gynecologic, and neonatal nursing : JOGNN / NAACOG "[Journal] OR "Journal of orthopaedic surgery (Hong Kong)"[Journal] OR "Journal of pediatric gastroenterology and nutrition"[Journal] OR "Journal of pediatric health care : official publication of National Association of Pediatric Nurse Associates & Practitioners"[Journal] OR "Journal of pediatric nursing"[Journal] OR "Journal of pediatric oncology nursing : official journal of the Association of Pediatric Oncology Nurses"[Journal] OR "Journal of pediatric surgery"[Journal] OR "Journal of perianesthesia nursing : official journal of the American Society of PeriAnesthesia Nurses / American Society of PeriAnesthesia Nurses"[Journal] OR "Journal of Physical Therapy Science"[Journal] OR "Journal of physiotherapy"[Journal] OR "Journal of plastic surgery and hand surgery"[Journal] OR "Journal of plastic, reconstructive & aesthetic surgery : jpras"[Journal] OR "Journal of professional nursing : official journal of the American Association of Colleges of Nursing"[Journal] OR "Journal of psychiatric and mental health nursing"[Journal] OR "Journal of psychosocial nursing and mental health services"[Journal] OR "Journal of reconstructive microsurgery"[Journal] OR "Journal of refractive surgery (Thorofare, N.J. : 1995)"[Journal] OR "Journal of rehabilitation medicine"[Journal] OR "Journal of rehabilitation research and development"[Journal] OR "Journal of renal nutrition : the official journal of the Council on Renal Nutrition of the National Kidney Foundation"[Journal] OR "Journal of shoulder and elbow surgery / American Shoulder and Elbow Surgeons ... [et al.]"[Journal] OR "Journal of speech, language, and hearing research : JSLHR"[Journal] OR "Journal of sport & exercise psychology"[Journal] OR "Journal of sport rehabilitation"[Journal] OR "Journal of studies on alcohol and drugs"[Journal] OR "Journal of surgical education"[Journal] OR "Journal of surgical



oncology"[Journal] OR "Journal of the academy of nutrition and dietetics"[Journal] OR "Journal of the American Association of Nurse Practitioners"[Journal] OR "Journal of the american college of nutrition"[Journal] OR "Journal of the American College of Surgeons"[Journal] OR "Journal of the american psychiatric nurses association"[Journal] OR "Journal of the experimental analysis of behavior"[Journal] OR "Journal of the International Neuropsychological Society : JINS"[Journal] OR " Journal of the International Society of Sports Nutrition"[Journal] OR "Journal of tissue viability"[Journal] OR "Journal of transcultural nursing : official journal of the Transcultural Nursing Society / Transcultural Nursing Society"[Journal] OR "Journal of vascular surgery"[Journal] OR "Journal of visceral surgery"[Journal] OR "Journal of wound, ostomy, and continence nursing : official publication of The Wound, Ostomy and Continence Nurses Society / WOCN"[Journal] OR "Jpen. Journal of parenteral and enteral nutrition"[Journal] OR "JSLS : Journal of the Society of Laparoendoscopic Surgeons / Society of Laparoendoscopic Surgeons"[Journal] OR "Knee surgery, sports traumatology, arthroscopy : official journal of the ESSKA."[Journal] OR "Langenbeck's archives of surgery / Deutsche gesellschaft für chirurgie"[Journal] OR "Language, cognition and neuroscience"[Journal] OR "Lasers in medical science"[Journal] OR "Lasers in surgery and medicine"[Journal] OR "Learning & behavior"[Journal] OR "Lipids"[Journal] OR "Lipids in health and disease"[Journal] OR "Liver transplantation : official publication of the American Association for the Study of Liver Diseases and the International Liver Transplantation Society"[Journal] OR "Manual therapy"[Journal] OR "Maternal & child nutrition"[Journal] OR "McN. The American journal of maternal child nursing"[Journal] OR "Midwifery"[Journal] OR "Minerva chirurgica"[Journal] OR "Minimally invasive therapy & allied technologies : MITAT : official journal of the Society for Minimally Invasive Therapy"[Journal] OR "Multisensory research"[Journal] OR "Nephrology nursing journal : journal of the American Nephrology Nurses' Association"[Journal] OR "Neuro-Chirurgie"[Journal] OR "Neurobiology of learning and memory"[Journal] OR "Neurocase"[Journal] OR "Neurocirugía (Asturias, Spain)"[Journal] OR "Neurologia medico-chirurgica"[Journal] OR "Neuropsychobiology"[Journal] OR "Neuropsychologia"[Journal] OR "Neuropsychological rehabilitation"[Journal] OR "Neuropsychology"[Journal] OR "NeuroRehabilitation"[Journal] OR "Neurorehabilitation and neural repair"[Journal] OR "Neuroscience and biobehavioral reviews"[Journal] OR "Neurosurgery"[Journal] OR "Neurosurgery clinics of north america"[Journal] OR "Neurosurgical focus"[Journal] OR "Neurosurgical review"[Journal] OR "Nurse education today"[Journal] OR "Nurse educator"[Journal] OR "Nursing & health sciences"[Journal] OR "Nursing economic\$"[Journal] OR "Nursing ethics"[Journal] OR "Nursing in critical care"[Journal] OR "Nursing inquiry"[Journal] OR "Nursing outlook"[Journal] OR "Nursing philosophy : an international journal for healthcare professionals"[Journal] OR "Nursing research"[Journal] OR "Nursing science quarterly"[Journal] OR "Nutrición hospitalaria"[Journal] OR "Nutrients"[Journal] OR "Nutrition (Burbank, Los Angeles County, Calif.)"[Journal] OR "Nutrition & diabetes"[Journal] OR "Nutrition & metabolism"[Journal] OR "Nutrition and cancer"[Journal] OR "Nutrition in clinical practice : official publication of the American Society for Parenteral and Enteral Nutrition"[Journal] OR "Nutrition journal"[Journal] OR "Nutrition, metabolism, and cardiovascular diseases : NMCD"[Journal] OR "Nutrition research (New York, N.Y.)"[Journal] OR "Nutrition research and practice"[Journal] OR "Nutrition research reviews"[Journal] OR "Nutrition reviews"[Journal] OR "Nutritional neuroscience"[Journal] OR "Obesity (Silver Spring, Md.)"[Journal] OR

"Obesity facts"[Journal] OR "Obesity research & clinical practice"[Journal] OR "Obesity surgery"[Journal] OR "Occupational therapy international"[Journal] OR "Oncology nursing forum"[Journal] OR "Ophthalmic plastic and reconstructive surgery"[Journal] OR "Ophthalmic surgery, lasers & imaging retina"[Journal] OR "Orthopaedics & traumatology, surgery & research : OTSR"[Journal] OR "Orthopedic nursing"[Journal] OR "Ostomy/wound management"[Journal] OR "Otolaryngology--head and neck surgery : official journal of American Academy of Otolaryngology-Head and Neck Surgery"[Journal] OR "Pain management nursing : official journal of the American Society of Pain Management Nurses"[Journal] OR "Pediatric neurosurgery"[Journal] OR "Pediatric physical therapy : the official publication of the Section on Pediatrics of the American Physical Therapy Association"[Journal] OR "Pediatric surgery international"[Journal] OR "Perception"[Journal] OR "Perspectives in psychiatric care"[Journal] OR "Pflege"[Journal] OR "Pharmacology, biochemistry, and behavior"[Journal] OR "Photomedicine and laser surgery"[Journal] OR "Physical & occupational therapy in pediatrics"[Journal] OR "Physical medicine and rehabilitation clinics of North America"[Journal] OR "Physical therapy"[Journal] OR "Physical therapy in sport : official journal of the Association of Chartered Physiotherapists in Sports Medicine"[Journal] OR "Physiology & behavior"[Journal] OR "Physiotherapy"[Journal] OR "Physiotherapy Canada. Physiothérapie Canada"[Journal] OR "Plant foods for human nutrition (Dordrecht, Netherlands)"[Journal] OR "Plastic and reconstructive surgery"[Journal] OR "Plastic surgery (Oakville, Ont.)"[Journal] OR "PM & R : the journal of injury, function, and rehabilitation"[Journal] OR "Progress in lipid research"[Journal] OR "Progress in transplantation (Aliso Viejo, Calif.)"[Journal] OR "Prosthetics and orthotics international"[Journal] OR "Psycho-oncology"[Journal] OR "Psychological bulletin"[Journal] OR "Psychological medicine"[Journal] OR "Psychological review"[Journal] OR "Psychology and psychotherapy"[Journal] OR "Psychology of sport and exercise"[Journal] OR "Psychophysiology"[Journal] OR "Psychosomatic medicine"[Journal] OR "Psychosomatics"[Journal] OR "Psychotherapy and psychosomatics"[Journal] OR "Public health nursing (Boston, Mass.)"[Journal] OR "Public health nutrition"[Journal] OR "Quarterly journal of experimental psychology (2006)"[Journal] OR "Rehabilitation nursing : the official journal of the Association of Rehabilitation Nurses"[Journal] OR "Research and theory for nursing practice"[Journal] OR "Research in gerontological nursing"[Journal] OR "Research in nursing & health"[Journal] OR "Research quarterly for exercise and sport"[Journal] OR "Revista da Escola de Enfermagem da U S P"[Journal] OR "Revista latino-americana de enfermagem"[Journal] OR "Scandinavian journal of occupational therapy"[Journal] OR "Scandinavian journal of surgery : SJS : official organ for the Finnish Surgical Society and the Scandinavian Surgical Society"[Journal] OR "Seminars in cutaneous medicine and surgery"[Journal] OR "Seminars in pediatric surgery"[Journal] OR "Seminars in speech and language"[Journal] OR "Seminars in vascular surgery"[Journal] OR "Shock (Augusta, Ga.)"[Journal] OR "Social cognitive and affective neuroscience"[Journal] OR "Social neuroscience"[Journal] OR "South African journal of surgery. Suid-Afrikaanse tydskrif vir chirurgie"[Journal] OR "Spinal cord"[Journal] OR "Stereotactic and functional neurosurgery"[Journal] OR "Stress (Amsterdam, Netherlands)"[Journal] OR "Stress and health : journal of the International Society for the Investigation of Stress"[Journal] OR "Substance use & misuse"[Journal] OR "Supportive care in cancer : official journal of the Multinational Association of Supportive Care in Cancer"[Journal] OR "Surgery"[Journal] OR "Surgery for obesity and related diseases : official journal of the American Society for Bariatric

Surgery"[Journal] OR "Surgery today"[Journal] OR "Surgical and radiologic anatomy : SRA"[Journal] OR "Surgical endoscopy"[Journal] OR "Surgical infections"[Journal] OR "Surgical innovation"[Journal] OR "Surgical laparoscopy, endoscopy & percutaneous techniques"[Journal] OR "Surgical oncology"[Journal] OR "Surgical oncology clinics of north america"[Journal] OR "Techniques in coloproctology"[Journal] OR "The American journal of clinical nutrition"[Journal] OR "The American journal of nursing"[Journal] OR "The American journal of surgical pathology"[Journal] OR "The American surgeon"[Journal] OR "The Annals of thoracic surgery"[Journal] OR "The Australian journal of rural health"[Journal] OR "The Behavioral and brain sciences"[Journal] OR "The bone & joint journal"[Journal] OR "The British journal of nutrition"[Journal] OR "The British journal of occupational therapy"[Journal] OR "The British journal of oral & maxillofacial surgery"[Journal] OR "The British journal of surgery"[Journal] OR "The Cleft palate-craniofacial journal : official publication of the American Cleft Palate-Craniofacial Association"[Journal] OR "The clinical neuropsychologist"[Journal] OR "The heart surgery forum"[Journal] OR "The Indian journal of surgery"[Journal] OR "The international journal of behavioral nutrition and physical activity"[Journal] OR "The International journal of eating disorders"[Journal] OR "The international journal of lower extremity wounds"[Journal] OR "The international journal of medical robotics + computer assisted surgery : mrcas"[Journal] OR "The journal of bone and joint surgery. American volume"[Journal] OR "The Journal of cardiovascular nursing"[Journal] OR "The Journal of cardiovascular surgery"[Journal] OR "The Journal of cardiovascular surgery"[Journal] OR "The journal of craniofacial surgery"[Journal] OR "The journal of ECT"[Journal] OR "The journal of foot and ankle surgery : official publication of the American College of Foot and Ankle Surgeons"[Journal] OR "The Journal of genetic psychology"[Journal] OR "The journal of hand surgery"[Journal] OR "The journal of hand surgery, European volume"[Journal] OR "The Journal of head trauma rehabilitation"[Journal] OR "The Journal of heart and lung transplantation : the official publication of the International Society for Heart Transplantation"[Journal] OR "The Journal of neuroscience nursing : journal of the American Association of Neuroscience Nurses"[Journal] OR "The Journal of nursing administration"[Journal] OR "The Journal of nursing education"[Journal] OR "The journal of nursing research : JNR"[Journal] OR "The Journal of nutrition"[Journal] OR "The journal of nutrition, health & aging"[Journal] OR "The Journal of nutritional biochemistry"[Journal] OR "The journal of orthopaedic and sports physical therapy"[Journal] OR "The Journal of perinatal & neonatal nursing"[Journal] OR "The Journal of school nursing : the official publication of the National Association of School Nurses"[Journal] OR "The Journal of surgical research"[Journal] OR "The Journal of the American Academy of Orthopaedic Surgeons"[Journal] OR "The Journal of the Association of Nurses in AIDS Care : JANAC "[Journal] OR "The Journal of thoracic and cardiovascular surgery"[Journal] OR "The journal of trauma and acute care surgery"[Journal] OR "The journals of gerontology. Series b, psychological sciences and social sciences"[Journal] OR "The Knee"[Journal] OR "The Nursing clinics of North America"[Journal] OR "The Proceedings of the Nutrition Society"[Journal] OR "The surgeon : journal of the Royal Colleges of Surgeons of Edinburgh and Ireland"[Journal] OR "The Surgical clinics of North America"[Journal] OR "The Thoracic and cardiovascular surgeon"[Journal] OR "Thoracic surgery clinics"[Journal] OR "Topics in stroke rehabilitation"[Journal] OR "Transplant international : official journal of the European Society for Organ Transplantation"[Journal] OR "Transplantation"[Journal] OR "Transplantation proceedings"[Journal] OR "Trends in

cognitive sciences"[Journal] OR "Turkish neurosurgery"[Journal] OR "Vascular and endovascular surgery"[Journal] OR "Western journal of nursing research"[Journal] OR "Women and birth : journal of the Australian College of Midwives"[Journal] OR "Workplace health & safety"[Journal] OR "World journal of emergency surgery : WJES"[Journal] OR "World journal of surgery"[Journal] OR "World journal of surgical oncology"[Journal] OR "World neurosurgery"[Journal] OR "Worldviews on evidence-based nursing / Sigma Theta Tau International, Honor Society of Nursing"[Journal] OR "Wound repair and regeneration : official publication of the Wound Healing Society [and] the European Tissue Repair Society"[Journal] OR "Wounds : a compendium of clinical research and practice"[Journal] OR "Zeitschrift für psychosomatische medizin und psychotherapie"[Journal] OR "Zentralblatt für chirurgie"[Journal])

**eTable 3.** Included Trials and Registration Status ClassificationAll data extracted and analyzed for each trial are available at <https://osf.io/jk2sq/>

| Refid | Authors                                                                                                                              | Title                                                                                                                                                                                                                | Journal Name                                     | Trial Registered? | Trial Registration Number |
|-------|--------------------------------------------------------------------------------------------------------------------------------------|----------------------------------------------------------------------------------------------------------------------------------------------------------------------------------------------------------------------|--------------------------------------------------|-------------------|---------------------------|
| 4     | MA ALMohiza, PJ Sparto, GF Marchetti, A Delitto, JM Furman, DL Miller, SL Whitney.                                                   | A Quality Improvement Project in Balance and Vestibular Rehabilitation and Its Effect on Clinical Outcomes.                                                                                                          | Journal of Neurologic Physical Therapy           | No                | NA                        |
| 16    | L Winter, HJ Moriarty, K Robinson, CV Piersol, T Vause-Earland, B Newhart, DB Iacovone, N Hodgson, LN Gitlin.                        | Efficacy and acceptability of a home-based, family-inclusive intervention for veterans with TBI: A randomized controlled trial.                                                                                      | Brain Injury                                     | Yes               | NCT01831830               |
| 19    | U Martinsen, H Bentzen, MK Holter, T Nilsen, H Skullerud, P Mowinckel, I Kjekken.                                                    | The effect of occupational therapy in patients with chronic obstructive pulmonary disease: A randomized controlled trial.                                                                                            | Scandinavian Journal of Occupational Therapy     | Yes               | ISRCTN79533637            |
| 28    | E Papakonstantinou, I Kechribari, K Sotirakoglou, P Tarantilis, T Gourdomichali, G Michas, V Kravvariti, K Voumvourakis, A Zampelas. | Acute effects of coffee consumption on self-reported gastrointestinal symptoms, blood pressure and stress indices in healthy individuals.                                                                            | Nutrition Journal                                | Yes               | NCT02253628               |
| 30    | A Mok, S Haldar, JC Lee, MK Leow, CJ Henry.                                                                                          | Postprandial changes in cardiometabolic disease risk in young Chinese men following isocaloric high or low protein diets, stratified by either high or low meal frequency - a randomized controlled crossover trial. | Nutrition Journal                                | Yes               | NCT02529228               |
| 38    | IS Wong-Yu, MK Mak.                                                                                                                  | Task- and Context-Specific Balance Training Program Enhances Dynamic Balance and Functional Performance in Parkinsonian Nonfallers: A Randomized Controlled Trial With Six-Month Follow-Up.                          | Archives of Physical Medicine and Rehabilitation | Yes               | NCT01799681               |
| 45    | K Tanaka, K Matsuo, D Kawaguchi, T Murakami, Y Hiroshima, A Hirano, S Sato, I Endo, M Taguri, K Koda.                                | Randomized clinical trial of peritoneal lavage for preventing surgical site infection in elective liver surgery.                                                                                                     | Journal of Hepato-Biliary-Pancreatic Sciences    | Yes               | UMIN000007058             |
| 50    | DH Bang, WS Shin, SJ Choi.                                                                                                           | The effects of modified constraint-induced movement therapy combined with trunk restraint in subacute stroke: a double-blinded randomized controlled trial.                                                          | Clinical Rehabilitation                          | No                | NA                        |

|     |                                                                                                                                                                                                   |                                                                                                                                                                       |                                                          |     |                     |
|-----|---------------------------------------------------------------------------------------------------------------------------------------------------------------------------------------------------|-----------------------------------------------------------------------------------------------------------------------------------------------------------------------|----------------------------------------------------------|-----|---------------------|
| 52  | D Pires, EB Cruz, C Caeiro.                                                                                                                                                                       | Aquatic exercise and pain neurophysiology education versus aquatic exercise alone for patients with chronic low back pain: a randomized controlled trial.             | Clinical Rehabilitation                                  | No  | NA                  |
| 53  | O Celiker Tosun, E Kaya Mutlu, AM Ergenoglu, AO Yenieli, G Tosun, M Malkoc, N Askar, IM Itil.                                                                                                     | Does pelvic floor muscle training abolish symptoms of urinary incontinence? A randomized controlled trial.                                                            | Clinical Rehabilitation                                  | No  | NA                  |
| 54  | DB Greer, SK Ostwald.                                                                                                                                                                             | Improving adherence in African American women with uncontrolled hypertension.                                                                                         | Journal of Cardiovascular Nursing                        | No  | NA                  |
| 56  | MJ Biddle, TA Lennie, GV Bricker, RE Kopec, SJ Schwartz, DK Moser.                                                                                                                                | Lycopene dietary intervention: a pilot study in patients with heart failure.                                                                                          | Journal of Cardiovascular Nursing                        | No  | NA                  |
| 59  | S Kikkenborg Berg, L Stoier, P Moons, AD Zwisler, P Winkel, P Ulrich Pedersen.                                                                                                                    | Emotions and health: findings from a randomized clinical trial on psychoeducational nursing to patients with implantable cardioverter defibrillator.                  | Journal of Cardiovascular Nursing                        | Yes | NCT00569478         |
| 68  | A Mariani, M Di Leo, N Giardullo, A Giussani, M Marini, F Buffoli, L Cipolletta, F Radaelli, P Ravelli, G Lombardi, V D'Onofrio, R Macchiarelli, E Iiritano, M Le Grazie, G Pantaleo, PA Testoni. | Early precut sphincterotomy for difficult biliary access to reduce post-ERCP pancreatitis: a randomized trial.                                                        | Endoscopy                                                | Yes | NCT02596646         |
| 74  | SE Sprich, SA Safren, D Finkelstein, JE Remmert, P Hammerness.                                                                                                                                    | A randomized controlled trial of cognitive behavioral therapy for ADHD in medication-treated adolescents.                                                             | Journal of Child Psychology and Psychiatry               | Yes | NCT01019252         |
| 79  | GV Espi-Lopez, R Zurriaga-Llorens, L Monzani, D Falla.                                                                                                                                            | The effect of manipulation plus massage therapy versus massage therapy alone in people with tension-type headache. a randomized controlled clinical trial.            | European Journal of Physical and Rehabilitation Medicine | Yes | NCT02450955         |
| 82  | RA Willems, CA Bolman, I Mesters, IM Kanera, AA Beaulen, L Lechner.                                                                                                                               | Short-term effectiveness of a web-based tailored intervention for cancer survivors on quality of life, anxiety, depression, and fatigue: randomized controlled trial. | Psycho-Oncology                                          | Yes | NTR3375             |
| 90  | A Motealleh, E Gheysari, E Shokri, S Sobhani.                                                                                                                                                     | The immediate effect of lumbopelvic manipulation on EMG of vasti and gluteus medius in athletes with patellofemoral pain syndrome: A randomized controlled trial.     | Manual Therapy                                           | Yes | IRCT2013122515932N1 |
| 100 | G Dikec, Y Kutlu.                                                                                                                                                                                 | Effectiveness of Adherence Therapy for People With Schizophrenia in Turkey: A Controlled Study.                                                                       | Archives of Psychiatric Nursing                          | No  | NA                  |
| 101 | A Navidian, F Kermansaravi, EE Tabas, F Saeedinezhad.                                                                                                                                             | Efficacy of Group Motivational Interviewing in the Degree of Drug Craving in the Addicts Under the                                                                    | Archives of Psychiatric Nursing                          | No  | NA                  |

|     |                                                                                                                                                                                                                   |                                                                                                                                                                          |                                                   |     |                |
|-----|-------------------------------------------------------------------------------------------------------------------------------------------------------------------------------------------------------------------|--------------------------------------------------------------------------------------------------------------------------------------------------------------------------|---------------------------------------------------|-----|----------------|
|     |                                                                                                                                                                                                                   | Methadone Maintenance Treatment (MMT) in South East of Iran.                                                                                                             |                                                   |     |                |
| 104 | K Zwickert, E Rieger, J Swinbourne, C Manns, C McAulay, AA Gibson, A Sainsbury, ID Caterson.                                                                                                                      | High or low intensity text-messaging combined with group treatment equally promote weight loss maintenance in obese adults.                                              | Obesity Research and Clinical Practice            | No  | NA             |
| 110 | P Valderas-Martinez, G Chiva-Blanch, R Casas, S Arranz, M Martínez-Huélamo, M Urpi-Sarda, X Torrado, D Corella, RM Lamuela-Raventós, R Estruch.                                                                   | Tomato Sauce Enriched with Olive Oil Exerts Greater Effects on Cardiovascular Disease Risk Factors than Raw Tomato and Tomato Sauce: A Randomized Trial.                 | Nutrients                                         | Yes | ISRCTN20409295 |
| 117 | ML Steers, AD Coffman, RE Wickham, JL Bryan, L Caraway, C Neighbors.                                                                                                                                              | Evaluation of Alcohol-Related Personalized Normative Feedback With and Without an Injunctive Message.                                                                    | Journal of Studies on Alcohol and Drugs           | No  | NA             |
| 118 | ST Ennett, C Jackson, S Choi, KA Hayes, DM Dickinson, JM Bowling.                                                                                                                                                 | A Parenting Program to Promote an Alcohol-Free Childhood: Influence on Parents' Readiness to Prevent Child Sipping.                                                      | Journal of Studies on Alcohol and Drugs           | No  | NA             |
| 119 | RE Doerfler, L Goodfellow.                                                                                                                                                                                        | Brief Exposure to Cognitive Behavioral Therapy Reduces Side-Effect Symptoms in Patients on Antiretroviral Therapy.                                                       | Journal of the Association of Nurses in AIDS Care | Yes | NCT00696839    |
| 122 | A Järvi, B Karlström, B Vessby, W Becker.                                                                                                                                                                         | Increased intake of fruits and vegetables in overweight subjects: effects on body weight, body composition, metabolic risk factors and dietary intake.                   | British Journal of Nutrition                      | No  | NA             |
| 125 | A José, S Dal Corso.                                                                                                                                                                                              | Inpatient rehabilitation improves functional capacity, peripheral muscle strength and quality of life in patients with community-acquired pneumonia: a randomised trial. | Journal of Physiotherapy                          | Yes | NCT02103400    |
| 128 | T Youssef, K El-Alfy, M Farid.                                                                                                                                                                                    | Randomized clinical trial of Desarda versus Lichtenstein repair for treatment of primary inguinal hernia.                                                                | International Journal of Surgery                  | Yes | NCT02329938    |
| 133 | TL Pape, JM Rosenow, M Steiner, T Parrish, A Guernon, B Harton, V Patil, DK Bhaumik, S McNamee, M Walker, K Froehlich, C Burress, C Odle, X Wang, AA Herrold, W Zhao, D Reda, T Mallinson, M Conneely, AJ Nemeth. | Placebo-Controlled Trial of Familiar Auditory Sensory Training for Acute Severe Traumatic Brain Injury: A Preliminary Report.                                            | Neurorehabilitation and Neural Repair             | Yes | NCT00557076    |
| 141 | S McEwen, H Polatajko, C Baum, J Rios, D Cirone, M Doherty, T Wolf.                                                                                                                                               | Combined Cognitive-Strategy and Task-Specific Training Improve Transfer to Untrained Activities in Subacute Stroke: An Exploratory Randomized Controlled Trial.          | Neurorehabilitation and Neural Repair             | Yes | NCT01309165    |

|     |                                                                                                                              |                                                                                                                                                                                        |                                                                     |     |                     |
|-----|------------------------------------------------------------------------------------------------------------------------------|----------------------------------------------------------------------------------------------------------------------------------------------------------------------------------------|---------------------------------------------------------------------|-----|---------------------|
| 142 | WJ Harmsen, JB Bussmann, RW Selles, HL Hurkmans, GM Ribbers.                                                                 | A Mirror Therapy-Based Action Observation Protocol to Improve Motor Learning After Stroke.                                                                                             | Neurorehabilitation and Neural Repair                               | Yes | ISRCTN40128145      |
| 143 | G Thrane, T Askim, R Stock, B Indredavik, R Gjone, A Erichsen, A Anke.                                                       | Efficacy of Constraint-Induced Movement Therapy in Early Stroke Rehabilitation: A Randomized Controlled Multisite Trial.                                                               | Neurorehabilitation and Neural Repair                               | Yes | NCT00906477         |
| 154 | BC Buffington, BM Melnyk, S Morales, A Lords, MR Zupan.                                                                      | Effects of an energy balance educational intervention and the COPE cognitive behavioral therapy intervention for Division I U.S. Air Force Academy female athletes.                    | Journal of the American Association of Nurse Practitioners          | No  | NA                  |
| 162 | S Monjezi, H Negahban, S Tajali, N Yadollahpour, N Majdinasab.                                                               | Effects of dual-task balance training on postural performance in patients with Multiple Sclerosis: A double-blind, randomized controlled pilot trial.                                  | Clinical Rehabilitation                                             | Yes | IRCT2014051917752N1 |
| 181 | Y Hua, C Yuan, K Monroe, ML Hinzman, S Alqahtani, AA Alwahbi, AM Kern.                                                       | Effects of the Reread-Adapt and Answer-Comprehend and goal setting intervention on decoding and reading comprehension skills of young adults with intellectual disabilities.           | Developmental Neurorehabilitation                                   | No  | NA                  |
| 182 | S Tibaek, G Gard, C Dehlendorff, H Iversen, F Biering-Soerensen, R Jensen.                                                   | Can pelvic floor muscle training improve quality of life in men with mild to moderate post-stroke and lower urinary tract symptoms? A randomised, controlled and single-blinded trial. | European Journal of Physical and Rehabilitation Medicine            | Yes | NCT01042249         |
| 188 | A Yildirim, GD Sürücü, A Karamercan, DE Gedik, N Atci, D Dülgeroğlu, N Özgirgin.                                             | Short-term effects of upper extremity circuit resistance training on muscle strength and functional independence in patients with paraplegia.                                          | Journal of Back and Musculoskeletal Rehabilitation                  | No  | NA                  |
| 192 | C Masia Warner, D Colognori, C Brice, K Herzig, L Mufson, C Lynch, PT Reiss, E Petkova, J Fox, DC Mocerri, J Ryan, RG Klein. | Can school counselors deliver cognitive-behavioral treatment for social anxiety effectively? A randomized controlled trial.                                                            | Journal of Child Psychology and Psychiatry                          | Yes | NCT01320800         |
| 193 | SA Çevik, M Başer.                                                                                                           | Effect of bed exercises and gum chewing on abdominal sounds, flatulence and early discharge in the early period after caesarean section.                                               | Journal of Clinical Nursing                                         | No  | NA                  |
| 197 | M Hopkins, C Gibbons, P Caudwell, JE Blundell, G Finlayson.                                                                  | Differing effects of high-fat or high-carbohydrate meals on food hedonics in overweight and obese individuals.                                                                         | British Journal of Nutrition                                        | Yes | ISRCTN47291569      |
| 201 | JM Zoellner, VE Hedrick, W You, Y Chen, BM Davy, KJ Porter, A Bailey, H Lane, R Alexander, PA Estabrooks.                    | Effects of a behavioral and health literacy intervention to reduce sugar-sweetened beverages: a randomized-controlled trial.                                                           | International Journal of Behavioral Nutrition and Physical Activity | Yes | NCT02193009         |



|     |                                                                                                                                   |                                                                                                                                                                                            |                                          |     |             |
|-----|-----------------------------------------------------------------------------------------------------------------------------------|--------------------------------------------------------------------------------------------------------------------------------------------------------------------------------------------|------------------------------------------|-----|-------------|
| 206 | RC Veasey, CF Haskell-Ramsay, DO Kennedy, B Tiplady, EJ Stevenson.                                                                | The Effect of Breakfast Prior to Morning Exercise on Cognitive Performance, Mood and Appetite Later in the Day in Habitually Active Women.                                                 | Nutrients                                | Yes | NCT01711008 |
| 209 | H Karpatkin, ET Cohen, A Rzetelny, JS Parrott, B Breisemeister, R Hartman, R Luu, D Napolione.                                    | Effects of Intermittent Versus Continuous Walking on Distance Walked and Fatigue in Persons With Multiple Sclerosis: A Randomized Crossover Trial.                                         | Journal of Neurologic Physical Therapy   | No  | NA          |
| 210 | T Martin, M Weatherall, TJ Anderson, MR MacAskill.                                                                                | A Randomized Controlled Feasibility Trial of a Specific Cueing Program for Falls Management in Persons With Parkinson Disease and Freezing of Gait.                                        | Journal of Neurologic Physical Therapy   | No  | NA          |
| 213 | TO Smith, R Chester, J Cross, N Hunt, A Clark, ST Donell.                                                                         | Rehabilitation following first-time patellar dislocation: a randomised controlled trial of purported vastus medialis obliquus muscle versus general quadriceps strengthening exercises.    | Knee                                     | No  | NA          |
| 219 | D Coyle, KM Joyce, JT Garvin, M Regan, OJ McAnena, PM Neary, MR Joyce.                                                            | Early post-operative removal of urethral catheter in patients undergoing colorectal surgery with epidural analgesia – a prospective pilot clinical study.                                  | International Journal of Surgery         | Yes | NCT01508767 |
| 220 | Y Yao, H Lv, J Zan, J Zhang, N Zhu, R Ning, J Jing.                                                                               | A comparison of lateral fixation versus dual plating for simple bicondylar fractures.                                                                                                      | Knee                                     | No  | NA          |
| 223 | C Bandín, FA Scheer, AJ Luque, V Ávila-Gandía, S Zamora, JA Madrid, P Gómez-Abellán, M Garaulet.                                  | Meal timing affects glucose tolerance, substrate oxidation and circadian-related variables: A randomized, crossover trial.                                                                 | International Journal of Obesity         | No  | NA          |
| 233 | G Ren.                                                                                                                            | Application of Early Nutrition Support in Neurosurgical Coma Patients.                                                                                                                     | Indian Journal of Surgery                | No  | NA          |
| 237 | FR Borle, B Mehra, A Ranjan Singh.                                                                                                | Comparison of Cosmetic Outcome Between Single-Incision Laparoscopic Cholecystectomy and Conventional Laparoscopic Cholecystectomy in Rural Indian Population: A Randomized Clinical Trial. | Indian Journal of Surgery                | No  | NA          |
| 259 | A Dejanovic, C Balkovec, S McGill.                                                                                                | Head posture influences low back muscle endurance tests in 11-year-old children.                                                                                                           | Journal of Motor Behavior                | No  | NA          |
| 260 | JY Lee, YS Lee, KC Song, KY Choi.                                                                                                 | Change in First Metatarsal Length After Proximal and Distal Chevron Osteotomies for Hallux Valgus Deformity.                                                                               | Journal of Foot and Ankle Surgery        | No  | NA          |
| 261 | MM Carrick, CA Morrison, NM Tapia, J Leonard, JW Suliburk, MA Norman, FJ Welsh, BG Scott, KR Liscum, SR Raty, MJ Wall, KL Mattox. | Intraoperative hypotensive resuscitation for patients undergoing laparotomy or thoracotomy for trauma: Early termination of a randomized prospective clinical trial.                       | Journal of Trauma and Acute Care Surgery | Yes | NCT00459160 |

|     |                                                                                                                                                    |                                                                                                                                                                                                                    |                                                     |     |                |
|-----|----------------------------------------------------------------------------------------------------------------------------------------------------|--------------------------------------------------------------------------------------------------------------------------------------------------------------------------------------------------------------------|-----------------------------------------------------|-----|----------------|
| 269 | P Pillastrini, F De Lima E Sá Resende, F Banchelli, A Burioli, E Di Ciaccio, AA Guccione, JH Villafañe, C Vanti.                                   | Effectiveness of Global Postural Reeducation in Patients With Chronic Nonspecific Neck Pain: A Randomized Controlled Trial.                                                                                        | Physical Therapy                                    | Yes | NCT01947231    |
| 274 | SP Clarke, N Poulis, BJ Moreton, DA Walsh, NB Lincoln.                                                                                             | Evaluation of a group acceptance commitment therapy intervention for people with knee or hip osteoarthritis: a pilot randomized controlled trial.                                                                  | Disability and Rehabilitation                       | No  | NA             |
| 275 | D Pecos-Martín, AE de Melo Aroeira, RL Verás Silva, G Martínez de Tejada Pozo, LM Rodríguez Solano, G Plaza-Manzano, T Gallego-Izquierdo, D Falla. | Immediate effects of thoracic spinal mobilisation on erector spinae muscle activity and pain in patients with thoracic spine pain: a preliminary randomised controlled trial.                                      | Physiotherapy                                       | Yes | ISRCTN47601528 |
| 293 | CY Chen, M Holbrook, MA Duess, MM Dohadwala, NM Hamburg, BF Asztalos, PE Milbury, JB Blumberg, JA Vita.                                            | Effect of almond consumption on vascular function in patients with coronary artery disease: a randomized, controlled, cross-over trial.                                                                            | Nutrition Journal                                   | Yes | NCT00782015    |
| 294 | RF Carvalho, GV Huguenin, RR Luiz, AS Moreira, GM Oliveira, G Rosa.                                                                                | Intake of partially defatted Brazil nut flour reduces serum cholesterol in hypercholesterolemic patients--a randomized controlled trial.                                                                           | Nutrition Journal                                   | Yes | NCT01990391    |
| 304 | AL Sherman, J Anderson, CD Rudolph, LS Walker.                                                                                                     | Lactose-Free Milk or Soy-Based Formulas Do Not Improve Caregivers' Distress or Perceptions of Difficult Infant Behavior.                                                                                           | Journal of Pediatric Gastroenterology and Nutrition | Yes | NCT01934257    |
| 308 | N Pérez-Ferre, L Del Valle, MJ Torrejón, I Barca, MI Calvo, P Matía, MA Rubio, AL Calle-Pascual.                                                   | Diabetes mellitus and abnormal glucose tolerance development after gestational diabetes: A three-year, prospective, randomized, clinical-based, Mediterranean lifestyle interventional study with parallel groups. | Clinical Nutrition                                  | Yes | ISRCTN24165302 |
| 318 | B Chavooshi, P Mohammadkhani, B Dolatshahi.                                                                                                        | A Randomized Double-Blind Controlled Trial Comparing Davanloo Intensive Short-Term Dynamic Psychotherapy as Internet-Delivered Vs Treatment as Usual for Medically Unexplained Pain: A 6-Month Pilot Study.        | Psychosomatics                                      | No  | NA             |
| 322 | M Kaplan, O Ozcan, FC Kaplan, HC Yalcin, B Salman.                                                                                                 | Conservative vs Surgical Interventions for Umbilical Pilonidal Sinus: A Multicenter, Double-Blind, Prospective, Randomized Clinical Trial.                                                                         | Journal of the American College of Surgeons         | Yes | NCT01662765    |
| 332 | II El-Desouky, MM Mohamed, AE Kandil.                                                                                                              | Clinical outcome of conventional versus biological fixation of subtrochanteric fractures by proximal femoral locked plate.                                                                                         | Injury                                              | No  | NA             |
| 333 | S Raimondi de Souza, GM Moraes de Oliveira, R Raggio Luiz, G Rosa.                                                                                 | [Effects of oat bran and nutrition counseling on the lipid and glucose profile and anthropometric parameters of hypercholesterolemia patients].                                                                    | Nutrición Hospitalaria                              | No  | NA             |

|     |                                                                                                                                                                           |                                                                                                                                                      |                                                          |     |                      |
|-----|---------------------------------------------------------------------------------------------------------------------------------------------------------------------------|------------------------------------------------------------------------------------------------------------------------------------------------------|----------------------------------------------------------|-----|----------------------|
| 334 | I Rosety, MT Pery, J Rosety, N García, MA Rodríguez-Pareja, F Brenes-Martín, A Díaz, M Rosety-Rodríguez, FJ Ordoñez, MÁ Rosety.                                           | [Circuit resistance training improved endothelial dysfunction in obese aged women].                                                                  | Nutrición Hospitalaria                                   | No  | NA                   |
| 335 | M Matsumoto, M Kato, K Oba, S Abiko, M Tsuda, S Miyamoto, T Mizushima, M Ono, S Omori, M Takahashi, S Ono, K Mabe, M Nakagawa, S Nakagawa, T Kudo, Y Shimizu, N Sakamoto. | Multicenter randomized controlled study to assess the effect of prophylactic clipping on post-polypectomy delayed bleeding.                          | Digestive Endoscopy                                      | Yes | UMIN000007165        |
| 362 | J Slater, E Skoe, DL Strait, S O'Connell, E Thompson, N Kraus.                                                                                                            | Music training improves speech-in-noise perception: Longitudinal evidence from a community-based music program.                                      | Behavioural Brain Research                               | No  | NA                   |
| 366 | TV McCann, W Songprakun, J Stephenson.                                                                                                                                    | A randomized controlled trial of guided self-help for improving the experience of caring for carers of clients with depression.                      | Journal of Advanced Nursing                              | Yes | ACTRN 12614000774628 |
| 369 | T Kamei, F Kajii, Y Yamamoto, Y Irie, R Kozakai, T Sugimoto, A Chigira, N Niino.                                                                                          | Effectiveness of a home hazard modification program for reducing falls in urban community-dwelling older adults: A randomized controlled trial.      | Japan Journal of Nursing Science                         | No  | NA                   |
| 376 | D Storzbach, EW Twamley, MS Roost, S Golshan, RM Williams, M O'Neil, AJ Jak, AP Turner, HM Kowalski, KF Pagulayan, M Huckans.                                             | Compensatory Cognitive Training for Operation Enduring Freedom/Operation Iraqi Freedom/Operation New Dawn Veterans With Mild Traumatic Brain Injury. | Journal of Head Trauma Rehabilitation                    | Yes | NCT01040858          |
| 377 | P Mortenson, A Singhal, AR Hengel, J Purtzki.                                                                                                                             | Impact of Early Follow-Up Intervention on Parent-Reported Postconcussion Pediatric Symptoms: A Feasibility Study.                                    | Journal of Head Trauma Rehabilitation                    | No  | NA                   |
| 382 | HS Kim, J Park, KY Park, MN Lee, OK Ham.                                                                                                                                  | Parent Involvement Intervention in Developing Weight Management Skills for both Parents and Overweight/Obese Children.                               | Asian Nursing Research                                   | No  | NA                   |
| 402 | DD Church, JR Hoffman, MB LaMonica, JJ Riffe, MW Hoffman, KM Baker, AN Varanoske, AJ Wells, DH Fukuda, JR Stout.                                                          | The effect of an acute ingestion of Turkish coffee on reaction time and time trial performance.                                                      | Journal of the International Society of Sports Nutrition | No  | NA                   |
| 403 | JF Wiborg, J van Bussel, A van Dijk, G Bleijenberg, H Knoop.                                                                                                              | Randomised controlled trial of cognitive behaviour therapy delivered in groups of patients with chronic fatigue syndrome.                            | Psychotherapy and Psychosomatics                         | Yes | ISRCTN15823716       |
| 404 | C Buntrock, D Ebert, D Lehr, H Riper, F Smit, P Cuijpers, M Berking.                                                                                                      | Effectiveness of a web-based cognitive behavioural intervention for subthreshold depression: pragmatic randomised controlled trial.                  | Psychotherapy and Psychosomatics                         | Yes | DRKS00004709         |

|     |                                                                                                                                                                                 |                                                                                                                                                                                                                    |                                                                  |     |                    |
|-----|---------------------------------------------------------------------------------------------------------------------------------------------------------------------------------|--------------------------------------------------------------------------------------------------------------------------------------------------------------------------------------------------------------------|------------------------------------------------------------------|-----|--------------------|
| 405 | S Weidt, R Klaghofer, A Kuenburg, AB Bruehl, A Delsignore, S Moritz, M Rufer.                                                                                                   | Internet-based self-help for trichotillomania: a randomized controlled study comparing decoupling and progressive muscle relaxation.                                                                               | Psychotherapy and Psychosomatics                                 | Yes | NCT02044237        |
| 431 | GS Nunes, PU Bender, FS de Menezes, I Yamashitafuji, VZ Vargas, B Wageck.                                                                                                       | Massage therapy decreases pain and perceived fatigue after long-distance Ironman triathlon: a randomised trial.                                                                                                    | Journal of Physiotherapy                                         | Yes | RBR-4n2sxx         |
| 433 | SM Ayasrah, MM Ahmad.                                                                                                                                                           | Educational Video Intervention Effects on Periprocedural Anxiety Levels Among Cardiac Catheterization Patients: A Randomized Clinical Trial.                                                                       | Research and Theory for Nursing Practice                         | No  | NA                 |
| 441 | A Duclos, S Touzet, L Restier, P Ocelli, F Cour-Andlauer, A Denis, S Polazzi, C Colin, A Lachaux, N Peretti, .                                                                  | Implementation of a computerized system in pediatric wards to improve nutritional care: a cluster randomized trial.                                                                                                | European Journal of Clinical Nutrition                           | Yes | NCT01081587        |
| 443 | C Fernández-Campos, AL Dengo, J Moncada-Jiménez.                                                                                                                                | Acute Consumption of an Energy Drink Does Not Improve Physical Performance of Female Volleyball Players.                                                                                                           | International Journal of Sport Nutrition and Exercise Metabolism | No  | NA                 |
| 447 | Y Yuan, J Gao, J Zang, C Zhang, X Yang, X Chen, H Zhou.                                                                                                                         | A Randomized, Clinical Trial Involving Different Surgical Methods Affecting the Sphincter of Oddi in Patients With Choledocholithiasis.                                                                            | Surgical Laparoscopy Endoscopy and Percutaneous Techniques       | No  | NA                 |
| 450 | B de Courten, MP de Courten, G Soldatos, SL Dougherty, N Straznicky, M Schlaich, KC Sourris, V Chand, JL Scheijen, BA Kingwell, ME Cooper, CG Schalkwijk, KZ Walker, JM Forbes. | Diet low in advanced glycation end products increases insulin sensitivity in healthy overweight individuals: a double-blind, randomized, crossover trial.                                                          | American Journal of Clinical Nutrition                           | Yes | NCT00422253        |
| 452 | CJ Metzgar, SM Nickols-Richardson.                                                                                                                                              | Effects of nutrition education on weight gain prevention: a randomized controlled trial.                                                                                                                           | Nutrition Journal                                                | No  | NA                 |
| 453 | M de Manincor, A Bensoussan, CA Smith, K Barr, M Schweikle, LL Donoghoe, S Bouchier, P Fahey.                                                                                   | INDIVIDUALIZED YOGA FOR REDUCING DEPRESSION AND ANXIETY, AND IMPROVING WELL-BEING: A RANDOMIZED CONTROLLED TRIAL.                                                                                                  | Depression and Anxiety                                           | Yes | ACTRN1261300178741 |
| 455 | PB Jørgensen, SB Bogh, S Kierkegaard, H Sørensen, A Odgaard, K Søballe, I Mechlenburg.                                                                                          | The efficacy of early initiated, supervised, progressive resistance training compared to unsupervised, home-based exercise after unicompartmental knee arthroplasty: A single-blinded randomized controlled trial. | Clinical Rehabilitation                                          | Yes | NCT01345825        |

|     |                                                                                                                      |                                                                                                                                                                                                      |                                                  |     |             |
|-----|----------------------------------------------------------------------------------------------------------------------|------------------------------------------------------------------------------------------------------------------------------------------------------------------------------------------------------|--------------------------------------------------|-----|-------------|
| 457 | A Ekeblad, F Falkenström, G Andersson, R Vestberg, R Holmqvist.                                                      | RANDOMIZED TRIAL OF INTERPERSONAL PSYCHOTHERAPY AND COGNITIVE BEHAVIORAL THERAPY FOR MAJOR DEPRESSIVE DISORDER IN A COMMUNITY-BASED PSYCHIATRIC OUTPATIENT CLINIC.                                   | Depression and Anxiety                           | Yes | NCT01851915 |
| 484 | SC Dusing, SE Brown, CM Van Drew, LR Thacker, KD Hendricks-Muñoz.                                                    | Supporting Play Exploration and Early Development Intervention From NICU to Home: A Feasibility Study.                                                                                               | Pediatric Physical Therapy                       | Yes | NCT02153736 |
| 488 | EL Guimarães, E Tudella.                                                                                             | Immediate Effect of Training at the Onset of Reaching in Preterm Infants: Randomized Clinical Trial.                                                                                                 | Journal of Motor Behavior                        | Yes | RBR-4RJWRX  |
| 495 | HK Hwang, SH Lee, DH Han, SH Choi, CM Kang, WJ Lee.                                                                  | Impact of Braun anastomosis on reducing delayed gastric emptying following pancreaticoduodenectomy: a prospective, randomized controlled trial.                                                      | Journal of Hepato-Biliary-Pancreatic Sciences    | Yes | NCT01787955 |
| 496 | C Lascarides, JM Buscaglia, PI Denoya, S Nagula, JC Bucobo, R Bergamaschi.                                           | Laparoscopic right colectomy versus laparoscopic-assisted colonoscopic polypectomy for endoscopically unresectable polyps: a randomised controlled trial.                                            | Colorectal Disease                               | Yes | NCT01986699 |
| 498 | A Baillet, WM Mampuya, IJ Dionne, E Comeau, A Méziat-Burdin, MF Langlois.                                            | Impacts of Supervised Exercise Training in Addition to Interdisciplinary Lifestyle Management in Subjects Awaiting Bariatric Surgery: a Randomized Controlled Study.                                 | Obesity Surgery                                  | Yes | NCT01452230 |
| 500 | K Souliotis, I Kalemikerakis, M Saridi, M Papageorgiou, A Kalokerinou.                                               | "A cost and clinical effectiveness analysis among moist wound healing dressings versus traditional methods in home care patients with pressure ulcers - A randomized controlled trial".              | Wound Repair and Regeneration                    | No  | NA          |
| 511 | A Jatoi, R Qin, D Satele, S Dakhil, P Kumar, DB Johnson, SP Thomas, PJ Stella, J Castillo, M Li, M Fernandez-Zapico. | "Enjoy glass of wine before eating:" a randomized trial to test the orexigenic effects of this advice in advanced cancer patients.                                                                   | Supportive Care in Cancer                        | Yes | NCT00936728 |
| 516 | JL Mackelprang, JM Hoffman, C Garbaccio, CH Bombardier.                                                              | Outcomes and lessons learned from a randomized controlled trial to reduce healthcare utilization during the first year after spinal cord injury rehabilitation: Telephone counseling vs. Usual Care. | Archives of Physical Medicine and Rehabilitation | Yes | NCT00693563 |
| 548 | L Lerner-Geva, E Bar-Zvi, G Levitan, V Boyko, B Reichman, O Pinhas-Hamiel.                                           | An intervention for improving the lifestyle habits of kindergarten children in Israel: a cluster-randomised controlled trial investigation.                                                          | Public Health Nutrition                          | No  | NA          |
| 552 | C Johnston Molloy, J Kearney, N Hayes, C Glennon Slattery, C Corish.                                                 | Pre-school manager training: a cost-effective tool to promote nutrition- and health-related practice                                                                                                 | Public Health Nutrition                          | No  | NA          |

|     |                                                                              |                                                                                                                                                                            |                                                                     |     |                     |
|-----|------------------------------------------------------------------------------|----------------------------------------------------------------------------------------------------------------------------------------------------------------------------|---------------------------------------------------------------------|-----|---------------------|
|     |                                                                              | improvements in the Irish full-day-care pre-school setting.                                                                                                                |                                                                     |     |                     |
| 555 | CJ Armitage.                                                                 | Evidence That Implementation Intentions Can Overcome the Effects of Smoking Habits.                                                                                        | Health Psychology                                                   | No  | NA                  |
| 561 | L Allet, S Müller-Pinget, I Punt, C Edelsten, A Ballif, A Golay, Z Pataky.   | Dance therapy combined with patient education improves quality of life of persons with obesity: A pilot feasibility study for a randomised controlled trial.               | Obesity Research and Clinical Practice                              | Yes | NCT01451892         |
| 562 | N Gandler, N Simmance, J Keenan, PF Choong, MM Dowsey.                       | A pilot study investigating dietetic weight loss interventions and 12 month functional outcomes of patients undergoing total joint replacement.                            | Obesity Research and Clinical Practice                              | No  | NA                  |
| 566 | IN Clark, FA Baker, CL Peiris, G Shoebridge, NF Taylor.                      | Participant-selected music and physical activity in older adults following cardiac rehabilitation: A randomized controlled trial.                                          | Clinical Rehabilitation                                             | Yes | ACTRN12613001369718 |
| 579 | G Ozgen, H Karapolat, Y Akkoc, N Yuceyar.                                    | Is customized vestibular rehabilitation effective in patients with multiple sclerosis? A randomized controlled trial.                                                      | European Journal of Physical and Rehabilitation Medicine            | No  | NA                  |
| 582 | JJ Korterink, LE Ockeloen, M Hilbink, MA Benninga, JM Deckers-Kocken.        | Yoga Therapy for Abdominal Pain Related-Functional Gastrointestinal Disorders in Children. A Randomized Controlled Trial.                                                  | Journal of Pediatric Gastroenterology and Nutrition                 | Yes | NTR3286             |
| 583 | KR Holt, H Haavik, AC Lee, B Murphy, CR Elley.                               | Effectiveness of Chiropractic Care to Improve Sensorimotor Function Associated With Falls Risk in Older People: A Randomized Controlled Trial.                             | Journal of Manipulative and Physiological Therapeutics              | Yes | ACTRN12608000333314 |
| 594 | N Gunawardena, K Kurotani, S Indrawansa, D Nonaka, T Mizoue, D Samarasinghe. | School-based intervention to enable school children to act as change agents on weight, physical activity and diet of their mothers: a cluster randomized controlled trial. | International Journal of Behavioral Nutrition and Physical Activity | Yes | SLCTR/2013/011      |
| 598 | F Khan, B Amatya, L Ng, M Galea.                                             | Rehabilitation outcomes in persons with spina bifida: A randomised controlled trial.                                                                                       | Journal of Rehabilitation Medicine                                  | No  | NA                  |
| 600 | H Pettersson, G Faager, E Westerdahl.                                        | Improved oxygenation during standing performance of deep breathing exercises with positive expiratory pressure after cardiac surgery: A randomized controlled trial.       | Journal of Rehabilitation Medicine                                  | No  | NA                  |

|     |                                                                                                    |                                                                                                                                                                                       |                                                                     |     |                |
|-----|----------------------------------------------------------------------------------------------------|---------------------------------------------------------------------------------------------------------------------------------------------------------------------------------------|---------------------------------------------------------------------|-----|----------------|
| 602 | A Manca, G Solinas, D Dragone, Z Dvir, F Deriu.                                                    | Characterization of ankle dorsiflexors performance in healthy subjects following maximal-intensity isokinetic resistance training.                                                    | Journal of Electromyography and Kinesiology                         | No  | NA             |
| 611 | TR Nansel, LM Laffel, DL Haynie, SN Mehta, LM Lipsky, LK Volkeneing, DA Butler, LA Higgins, A Liu. | Improving dietary quality in youth with type 1 diabetes: randomized clinical trial of a family-based behavioral intervention.                                                         | International Journal of Behavioral Nutrition and Physical Activity | Yes | NCT00999375    |
| 620 | MA Kredlow, MW Otto.                                                                               | Interference with the reconsolidation of trauma-related memories in adults.                                                                                                           | Depression and Anxiety                                              | No  | NA             |
| 621 | Z Vally, L Murray, M Tomlinson, PJ Cooper.                                                         | The impact of dialogic book-sharing training on infant language and attention: a randomized controlled trial in a deprived South African community.                                   | Journal of Child Psychology and Psychiatry                          | Yes | ISRCTN39953901 |
| 622 | AY Hardan, GW Gengoux, KL Berquist, RA Libove, CM Ardel, J Phillips, TW Frazier, MB Minjarez.      | A randomized controlled trial of Pivotal Response Treatment Group for parents of children with autism.                                                                                | Journal of Child Psychology and Psychiatry                          | Yes | NCT01881750    |
| 627 | F Khan, B Amatya, A Elmalik, M Lowe, L Ng, I Reid, MP Galea.                                       | An enriched environmental programme during inpatient neuro-rehabilitation: A randomized controlled trial.                                                                             | Journal of Rehabilitation Medicine                                  | No  | NA             |
| 638 | M De Fine, F Traina, G Giavaresi, E Leo, I Sanzarello, F Perna, R Dattola, C Faldini.              | Effect of different postoperative flexion regimes on the outcomes of total knee arthroplasty: randomized controlled trial.                                                            | Knee Surgery, Sports Traumatology, Arthroscopy                      | No  | NA             |
| 645 | AC Jones, L Vanderlee, CM White, EP Hobin, I Bordes, D Hammond.                                    | 'How many calories did I just eat?' An experimental study examining the effect of changes to serving size information on nutrition labels.                                            | Public Health Nutrition                                             | No  | NA             |
| 654 | JM Thomas, CT Dourish, S Higgs.                                                                    | Effects of awareness that food intake is being measured by a universal eating monitor on the consumption of a pasta lunch and a cookie snack in healthy female volunteers.            | Appetite                                                            | No  | NA             |
| 662 | AA Hane, MM Myers, MA Hofer, RJ Ludwig, MS Halperin, J Austin, SB Glickstein, MG Welch.            | Family nurture intervention improves the quality of maternal caregiving in the neonatal intensive care unit: evidence from a randomized controlled trial.                             | Journal of Developmental and Behavioral Pediatrics                  | Yes | NCT01439269    |
| 667 | SD Woo, TH Kim.                                                                                    | The effects of lumbar stabilization exercise with thoracic extension exercise on lumbosacral alignment and the low back pain disability index in patients with chronic low back pain. | Journal of Physical Therapy Science                                 | No  | NA             |

|     |                                                                                                  |                                                                                                                                                                                                                   |                                                    |     |                |
|-----|--------------------------------------------------------------------------------------------------|-------------------------------------------------------------------------------------------------------------------------------------------------------------------------------------------------------------------|----------------------------------------------------|-----|----------------|
| 668 | SE Park, KO Min, SB Lee, WS Choi, SH Kim.                                                        | Effect of eye movements and proprioceptive neuromuscular facilitation on balance and head alignment in stroke patients with neglect syndrome.                                                                     | Journal of Physical Therapy Science                | No  | NA             |
| 670 | KH Park, JY Lim, TH Kim.                                                                         | The effects of ankle strategy exercises on unstable surfaces on dynamic balance and changes in the COP.                                                                                                           | Journal of Physical Therapy Science                | No  | NA             |
| 674 | SH Oh, KT Yoo.                                                                                   | The effects of stabilization exercises using a sling and stretching on the range of motion and cervical alignment of straight neck patients.                                                                      | Journal of Physical Therapy Science                | No  | NA             |
| 675 | OC Tosun, U Solmaz, A Ekin, G Tosun, C Gezer, AM Ergenoglu, AO Yeniel, E Mat, M Malkoc, N Askar. | Assessment of the effect of pelvic floor exercises on pelvic floor muscle strength using ultrasonography in patients with urinary incontinence: a prospective randomized controlled trial.                        | Journal of Physical Therapy Science                | No  | NA             |
| 683 | BA Söylemez, Ö Küçükgüçlü, KC Buckwalter.                                                        | Application of the Progressively Lowered Stress Threshold Model with Community-Based Caregivers: A Randomized Controlled Trial.                                                                                   | Journal of Gerontological Nursing                  | No  | NA             |
| 685 | A Paungmali, LJ Henry, P Silitertpisan, U Pirunsan, S Uthaikhup.                                 | Improvements in tissue blood flow and lumbopelvic stability after lumbopelvic core stabilization training in patients with chronic non-specific low back pain.                                                    | Journal of Physical Therapy Science                | No  | NA             |
| 690 | LS LaFreniere, MG Newman.                                                                        | A BRIEF ECOLOGICAL MOMENTARY INTERVENTION FOR GENERALIZED ANXIETY DISORDER: A RANDOMIZED CONTROLLED TRIAL OF THE WORRY OUTCOME JOURNAL.                                                                           | Depression and Anxiety                             | No  | NA             |
| 716 | L Bowers, K James, A Quirk, A Simpson, , D Stewart, J Hodsoll.                                   | Reducing conflict and containment rates on acute psychiatric wards: The Safewards cluster randomised controlled trial.                                                                                            | International Journal of Nursing Studies           | Yes | ISRCTN38001825 |
| 721 | KJ Moon, SM Lee.                                                                                 | The effects of a tailored intensive care unit delirium prevention protocol: A randomized controlled trial.                                                                                                        | International Journal of Nursing Studies           | No  | NA             |
| 722 | JR Kardouni, PE Pidcoe, SW Shaffer, SD Finucane, SA Cheatham, CO Sousa, LA Michener.             | Thoracic Spine Manipulation in Individuals With Subacromial Impingement Syndrome Does Not Immediately Alter Thoracic Spine Kinematics, Thoracic Excursion, or Scapular Kinematics: A Randomized Controlled Trial. | Journal of Orthopaedic and Sports Physical Therapy | No  | NA             |
| 726 | JA Prieto, M Del Valle, P Nistal, D Méndez, C Abelairas-Gómez, R Barcala-Furelos.                | [Impact of exercise on the body composition and aerobic capacity of elderly with obesity through three models of intervention].                                                                                   | Nutrición Hospitalaria                             | No  | NA             |



|     |                                                                                                                       |                                                                                                                                                                                                                                            |                                        |     |                    |
|-----|-----------------------------------------------------------------------------------------------------------------------|--------------------------------------------------------------------------------------------------------------------------------------------------------------------------------------------------------------------------------------------|----------------------------------------|-----|--------------------|
| 731 | P Warschburger, K Kroeller, J Haerting, S Unverzagt, A van Egmond-Fröhlich.                                           | Empowering Parents of Obese Children (EPOC): A Randomized Controlled Trial on Additional Long-Term Weight Effects of Parent Training.                                                                                                      | Appetite                               | Yes | ISRCTN24655766     |
| 754 | WC Hsu, LH Ho, MH Lin, HL Chiu.                                                                                       | Body Posture Angle Affects the Physiological Indices of Patients With Liver Cirrhosis Ascites.                                                                                                                                             | Gastroenterology Nursing               | No  | NA                 |
| 756 | A Luan, KJ Hui, AC Remington, X Liu, GK Lee.                                                                          | Effects of A Novel Decision Aid for Breast Reconstruction: A Randomized Prospective Trial.                                                                                                                                                 | Annals of Plastic Surgery              | No  | NA                 |
| 768 | JH Villafaña, M Isgrò, M Borsatti, P Berjano, C Pirali, S Negrini.                                                    | Effects of action observation treatment in recovery after total knee replacement: A prospective clinical trial.                                                                                                                            | Clinical Rehabilitation                | Yes | NCT02707419        |
| 780 | SK Gebauer, F Destailats, F Dionisi, RM Krauss, DJ Baer.                                                              | Vaccenic acid and trans fatty acid isomers from partially hydrogenated oil both adversely affect LDL cholesterol: a double-blind, randomized controlled trial.                                                                             | American Journal of Clinical Nutrition | Yes | NCT00942656        |
| 784 | GF Becker, EP Passos, CC Moulin.                                                                                      | Short-term effects of a hypocaloric diet with low glycemic index and low glycemic load on body adiposity, metabolic variables, ghrelin, leptin, and pregnancy rate in overweight and obese infertile women: a randomized controlled trial. | American Journal of Clinical Nutrition | Yes | NCT02416960        |
| 787 | JN Kuzma, G Cromer, DK Hagman, KL Brey Meyer, CL Roth, KE Foster-Schubert, SE Holte, HS Callahan, DS Weigle, M Kratz. | No difference in ad libitum energy intake in healthy men and women consuming beverages sweetened with fructose, glucose, or high-fructose corn syrup: a randomized trial.                                                                  | American Journal of Clinical Nutrition | Yes | NCT00475475        |
| 789 | A Madjd, MA Taylor, A Delavari, R Malekzadeh, IA Macdonald, HR Farshchi.                                              | Effects on weight loss in adults of replacing diet beverages with water during a hypoenergetic diet: a randomized, 24-wk clinical trial.                                                                                                   | American Journal of Clinical Nutrition | Yes | IRCT201402177754N5 |
| 796 | SA Moore, K Hallsworth, DG Jakovljevic, AM Blamire, J He, GA Ford, L Rochester, MI Trenell.                           | Effects of Community Exercise Therapy on Metabolic, Brain, Physical, and Cognitive Function Following Stroke: A Randomized Controlled Pilot Trial.                                                                                         | Neurorehabilitation and Neural Repair  | Yes | ISRCTN41026907     |
| 797 | Y Bleyenheuft, C Arnould, MB Brandao, C Bleyenheuft, AM Gordon.                                                       | Hand and Arm Bimanual Intensive Therapy Including Lower Extremity (HABIT-ILE) in Children With Unilateral Spastic Cerebral Palsy: A Randomized Trial.                                                                                      | Neurorehabilitation and Neural Repair  | Yes | NCT01700777        |
| 798 | ER Skidmore, DR Dawson, MA Butters, ES Grattan, SB Juengst, EM Whyte, A Begley, MB Holm, JT Becker.                   | Strategy Training Shows Promise for Addressing Disability in the First 6 Months After Stroke.                                                                                                                                              | Neurorehabilitation and Neural Repair  | No  | NA                 |

|     |                                                                                                              |                                                                                                                                                                           |                                            |     |                     |
|-----|--------------------------------------------------------------------------------------------------------------|---------------------------------------------------------------------------------------------------------------------------------------------------------------------------|--------------------------------------------|-----|---------------------|
| 799 | SY Schaefer, LE Dibble, K Duff.                                                                              | Efficacy and Feasibility of Functional Upper Extremity Task-Specific Training for Older Adults With and Without Cognitive Impairment.                                     | Neurorehabilitation and Neural Repair      | No  | NA                  |
| 800 | KM Kim, CD Ingersoll, J Hertel.                                                                              | Facilitation of Hoffmann reflexes of ankle muscles in prone but not standing positions by focal ankle-joint cooling.                                                      | Journal of Sport Rehabilitation            | No  | NA                  |
| 801 | A Aytar, G Baltaci, TL Uhl, H Tuzun, P Oztop, M Karatas.                                                     | The effects of scapular mobilization in patients with subacromial impingement syndrome: a randomized, double-blind, placebo-controlled clinical trial.                    | Journal of Sport Rehabilitation            | No  | NA                  |
| 803 | D Côté-Arsenault, K Schwartz, H Krowchuk, TP McCoy.                                                          | Evidence-based intervention with women pregnant after perinatal loss.                                                                                                     | American Journal of Maternal/Child Nursing | No  | NA                  |
| 807 | FJ Aidar, RJ de Oliveira, DG de Matos, ML Mazini Filho, OC Moreira, CE de Oliveira, RC Hickner, VM Reis.     | A Randomized Trial Investigating the Influence of Strength Training on Quality of Life in Ischemic Stroke.                                                                | Topics in Stroke Rehabilitation            | No  | NA                  |
| 808 | EJ Kuk, JM Kim, DW Oh, HJ Hwang.                                                                             | Effects of action observation therapy on hand dexterity and EEG-based cortical activation patterns in patients with post-stroke hemiparesis.                              | Topics in Stroke Rehabilitation            | No  | NA                  |
| 809 | TJ Wolf, CM Baum, D Lee, J Hammel.                                                                           | The Development of the Improving Participation after Stroke Self-Management Program (IPASS): An Exploratory Randomized Clinical Study.                                    | Topics in Stroke Rehabilitation            | No  | NA                  |
| 816 | KN Thomas, JD Cotter, MJ Williams, AM van Rij.                                                               | Repeated Episodes of Remote Ischemic Preconditioning for the Prevention of Myocardial Injury in Vascular Surgery.                                                         | Vascular and Endovascular Surgery          | Yes | ACTRN12611001265965 |
| 825 | ER Vina, D Richardson, E Medvedeva, C Kent Kwoh, A Collier, SA Ibrahim.                                      | Does a Patient-centered Educational Intervention Affect African-American Access to Knee Replacement? A Randomized Trial.                                                  | Clinical Orthopaedics and Related Research | Yes | NCT02413411         |
| 829 | CC Woo, JH Donnelly, R Steinberg-Epstein, M Leon.                                                            | Environmental enrichment as a therapy for autism: A clinical trial replication and extension.                                                                             | Behavioral Neuroscience                    | No  | NA                  |
| 839 | AJ Daley, RV Blamey, K Jolly, AK Roalfe, KM Turner, S Coleman, M McGuinness, I Jones, DJ Sharp, C MacArthur. | A pragmatic randomized controlled trial to evaluate the effectiveness of a facilitated exercise intervention as a treatment for postnatal depression: the PAM-PeRS trial. | Psychological Medicine                     | Yes | ISRCTN84245563      |
| 841 | N Chaudhary, V Varma, S Kapoor, N Mehta, V Kumaran, S Nundy.                                                 | Implementation of a surgical safety checklist and postoperative outcomes: a prospective randomized controlled study.                                                      | Journal of Gastrointestinal Surgery        | No  | NA                  |
| 845 | SK Chambers, S Occhipinti, L Schover, L Nielsen, L Zajdlewicz, S Clutton, K Halford, RA Gardiner, J Dunn.    | A randomised controlled trial of a couples-based sexuality intervention for men with localised prostate cancer and their female partners.                                 | Psycho-Oncology                            | Yes | ACTRN12608000358347 |

|     |                                                                                                                 |                                                                                                                                                                                                                                 |                                                          |     |                     |
|-----|-----------------------------------------------------------------------------------------------------------------|---------------------------------------------------------------------------------------------------------------------------------------------------------------------------------------------------------------------------------|----------------------------------------------------------|-----|---------------------|
| 850 | CE Short, EL James, A Girgis, MI D'Souza, RC Plotnikoff.                                                        | Main outcomes of the Move More for Life Trial: a randomised controlled trial examining the effects of tailored-print and targeted-print materials for promoting physical activity among post-treatment breast cancer survivors. | Psycho-Oncology                                          | Yes | ACTRN12611001061921 |
| 852 | S Madden, J Miskovic-Wheatley, A Wallis, M Kohn, J Lock, D Le Grange, B Jo, S Clarke, P Rhodes, P Hay, S Touyz. | A randomized controlled trial of in-patient treatment for anorexia nervosa in medically unstable adolescents.                                                                                                                   | Psychological Medicine                                   | Yes | ACTRN01260700009415 |
| 877 | KM Harris, MT Goh.                                                                                              | Is suicide assessment harmful to participants? Findings from a randomized controlled trial.                                                                                                                                     | International Journal of Mental Health Nursing           | Yes | R000022314          |
| 881 | EM Forman, JA Shaw, SP Goldstein, ML Butryn, LM Martin, N Meiran, R Crosby, SM Manasse.                         | Mindful decision making and inhibitory control training as complementary means to decrease snack consumption.                                                                                                                   | Appetite                                                 | No  | NA                  |
| 885 | JJ Annesi.                                                                                                      | Mediation of the relationship of behavioural treatment type and changes in psychological predictors of healthy eating by body satisfaction changes in women with obesity.                                                       | Obesity Research and Clinical Practice                   | No  | NA                  |
| 887 | CR Smit, RN de Leeuw, KE Bevelander, WJ Burk, M Buijzen.                                                        | A social network-based intervention stimulating peer influence on Children's self-reported water consumption: A randomized control trial.                                                                                       | Appetite                                                 | Yes | ACTRN12614001179628 |
| 894 | AM Holwerda, K Lenaerts, J Bierau, LJ van Loon.                                                                 | Body Position Modulates Gastric Emptying and Affects the Post-Prandial Rise in Plasma Amino Acid Concentrations Following Protein Ingestion in Humans.                                                                          | Nutrients                                                | Yes | NTR5027             |
| 897 | Y Zhang, YZ Wang, LP Huang, B Bai, S Zhou, MM Yin, H Zhao, XN Zhou, HT Wang.                                    | Aquatic Therapy Improves Outcomes for Subacute Stroke Patients by Enhancing Muscular Strength of Paretic Lower Limbs Without Increasing Spasticity: A Randomized Controlled Trial.                                              | American Journal of Physical Medicine and Rehabilitation | No  | NA                  |
| 902 | G Loladze, RU Kuehnel, T Claus, M Hartrumpf, F Kuepper, M Pohl, JM Albes.                                       | Double-Wire versus Single-Wire Sternal Closure in Obese Patients: a Randomized Prospective Study.                                                                                                                               | Thoracic and Cardiovascular Surgeon                      | No  | NA                  |
| 909 | C Sun, M Zhang, C Jiang.                                                                                        | Vertical Tunnel-based Low-site Peritoneal Dialysis Catheter Implantation Decreases the Incidence of Catheter Malfunction.                                                                                                       | American Surgeon                                         | No  | NA                  |
| 912 | CE Edmiston, CJ Lee, CJ Krepel, M Spencer, D Leaper, KR Brown, BD Lewis, PJ Rossi, MJ Malinowski, GR Seabrook.  | Evidence for a Standardized Preadmission Showering Regimen to Achieve Maximal Antiseptic Skin Surface Concentrations of Chlorhexidine Gluconate, 4%, in Surgical Patients.                                                      | JAMA Surgery                                             | No  | NA                  |

|     |                                                                                                                                                                                |                                                                                                                                                                              |                                              |     |                     |
|-----|--------------------------------------------------------------------------------------------------------------------------------------------------------------------------------|------------------------------------------------------------------------------------------------------------------------------------------------------------------------------|----------------------------------------------|-----|---------------------|
| 915 | B Tariku, SJ Whiting, D Mulualem, P Singh.                                                                                                                                     | Application of the Health Belief Model to Teach Complementary Feeding Messages in Ethiopia.                                                                                  | Ecology of Food and Nutrition                | No  | NA                  |
| 920 | MP Martens, JM Cadigan, RE Rogers, ZH Osborn.                                                                                                                                  | Personalized drinking feedback intervention for veterans of the wars in Iraq and Afghanistan: a randomized controlled trial.                                                 | Journal of Studies on Alcohol and Drugs      | Yes | NCT01211353         |
| 922 | LD Van Mierlo, FJ Meiland, PM Van de Ven, HP Van Hout, RM Dröes.                                                                                                               | Evaluation of DEM-DISC, customized e-advice on health and social support services for informal carers and case managers of people with dementia; a cluster randomized trial. | International Psychogeriatrics               | Yes | NTR3299             |
| 926 | MA Tucker, MS Ganio, JD Adams, LA Brown, CB Ridings, JM Burchfield, FB Robinson, JL McDermott, BA Schreiber, NE Moyon, TA Washington, AC Bermudez, MP Bennett, ME Buyckx.      | Hydration Status over 24-H Is Not Affected by Ingested Beverage Composition.                                                                                                 | Journal of the American College of Nutrition | No  | NA                  |
| 933 | SJ Groves, RJ Porter, J Jordan, R Knight, JD Carter, VV McIntosh, K Fernando, CM Frampton, RT Mulder, C Lacey, PR Joyce.                                                       | Changes in neuropsychological function after treatment with metacognitive therapy or cognitive behavior therapy for depression.                                              | Depression and Anxiety                       | Yes | ACTRN12611000804987 |
| 936 | TL Grindstaff, BG Pietrosimone, LD Sauer, DC Kerrigan, JT Patrie, J Hertel, CD Ingersoll.                                                                                      | Manual therapy directed at the knee or lumbopelvic region does not influence quadriceps spinal reflex excitability.                                                          | Manual Therapy                               | No  | NA                  |
| 938 | A Casanova-Méndez, A Oliva-Pascual-Vaca, C Rodriguez-Blanco, AM Heredia-Rizo, K Gogorza-Arroitaonandia, G Almazán-Campos.                                                      | Comparative short-term effects of two thoracic spinal manipulation techniques in subjects with chronic mechanical neck pain: a randomized controlled trial.                  | Manual Therapy                               | Yes | ACTRN12613001000796 |
| 942 | E Kapi, M Bozkurt, T Ozer, MY Celik.                                                                                                                                           | Is Early Nasal Shaping With a Limited Alar Base Incision Possible in the Repair of Cleft Lips?                                                                               | Journal of Craniofacial Surgery              | No  | NA                  |
| 947 | Z Gok Metin, L Ozdemir.                                                                                                                                                        | The Effects of Aromatherapy Massage and Reflexology on Pain and Fatigue in Patients with Rheumatoid Arthritis: A Randomized Controlled Trial.                                | Pain Management Nursing                      | No  | NA                  |
| 949 | E Mohammadi, H Khoshab, A Kazemnejad.                                                                                                                                          | Activities of daily living for patients with chronic heart failure: a partnership care model evaluation.                                                                     | Applied Nursing Research                     | No  | NA                  |
| 955 | J Du, J Johnston, R Studd.                                                                                                                                                     | Does waiting after peri-prostatic nerve block reduce pain during transrectal ultrasound-guided prostate biopsy? A randomized controlled trial.                               | ANZ Journal of Surgery                       | No  | NA                  |
| 964 | M Balfegó, S Canivell, FA Hanzu, A Sala-Vila, M Martínez-Medina, S Murillo, T Mur, EG Ruano, F Linares, N Porras, S Valladares, M Fontalba, E Roura, A Novials, C Hernández, G | Effects of sardine-enriched diet on metabolic control, inflammation and gut microbiota in drug-naïve patients with type 2 diabetes: a pilot randomized trial.                | Lipids in Health and Disease                 | Yes | NCT02294526         |

|      |                                                                                           |                                                                                                                                                                                                     |                                                                  |     |                      |
|------|-------------------------------------------------------------------------------------------|-----------------------------------------------------------------------------------------------------------------------------------------------------------------------------------------------------|------------------------------------------------------------------|-----|----------------------|
|      | Aranda, A Sisó-Almirall, G Rojo-Martínez, R Simó, R Gomis.                                |                                                                                                                                                                                                     |                                                                  |     |                      |
| 984  | JR Rowe, KD Biggerstaff, V Ben-Ezra, D Nichols, N DiMarco.                                | Prior Exercise Does Not Reduce Postprandial Lipemia Following a Mixed Glucose Meal When Compared to a Mixed Fructose Meal.                                                                          | International Journal of Sport Nutrition and Exercise Metabolism | No  | NA                   |
| 1010 | P Gentil, SR Soares, MC Pereira, RR da Cunha, SS Martorelli, AS Martorelli, M Bottaro.    | Effect of adding single-joint exercises to a multi-joint exercise resistance-training program on strength and hypertrophy in untrained subjects.                                                    | Applied Physiology, Nutrition, and Metabolism                    | No  | NA                   |
| 1012 | BP Patel, B Luhovyy, R Mollard, JE Painter, GH Anderson.                                  | A premeal snack of raisins decreases mealtime food intake more than grapes in young children.                                                                                                       | Applied Physiology, Nutrition, and Metabolism                    | Yes | NCT01712737          |
| 1019 | PL Rumbold, A St Clair Gibson, EJ Stevenson, JA King, DJ Stensel, CJ Dodd-Reynolds.       | Influence of netball-based exercise on energy intake, subjective appetite and plasma acylated ghrelin in adolescent girls.                                                                          | Applied Physiology, Nutrition, and Metabolism                    | No  | NA                   |
| 1020 | BA Gordon, SR Bird, RJ Macisaac, AC Benson.                                               | Glycemic response varies between resistance and aerobic exercise in inactive males with long-term type 2 diabetes.                                                                                  | Applied Physiology, Nutrition, and Metabolism                    | Yes | ACTRN1261000 0906055 |
| 1022 | AE Lima-Silva, FO Pires, R Bertuzzi, MD Silva-Cavalcante, RS Oliveira, MA Kiss, D Bishop. | Effects of a low- or a high-carbohydrate diet on performance, energy system contribution, and metabolic responses during supramaximal exercise.                                                     | Applied Physiology, Nutrition, and Metabolism                    | No  | NA                   |
| 1026 | MF Nunez, RC Mollard, BL Luhovyy, CL Wong, GH Anderson.                                   | Acute sodium ingestion has no effect on short-term food and water intake, subjective appetite, thirst, or glycemic response in healthy young men.                                                   | Applied Physiology, Nutrition, and Metabolism                    | No  | NA                   |
| 1029 | CE Donges, R Duffield, KJ Guelfi, GC Smith, DR Adams, JA Edge.                            | Comparative effects of single-mode vs. duration-matched concurrent exercise training on body composition, low-grade inflammation, and glucose regulation in sedentary, overweight, middle-aged men. | Applied Physiology, Nutrition, and Metabolism                    | No  | NA                   |
| 1030 | MJ Munsters, MC Geraedts, WH Saris.                                                       | Effects of different protein and glycemic index diets on metabolic profiles and substrate partitioning in lean healthy males.                                                                       | Applied Physiology,                                              | Yes | NCT01034241          |

|      |                                                                                                                                                                                  |                                                                                                                                                                                          |                                                                     |     |                     |
|------|----------------------------------------------------------------------------------------------------------------------------------------------------------------------------------|------------------------------------------------------------------------------------------------------------------------------------------------------------------------------------------|---------------------------------------------------------------------|-----|---------------------|
|      |                                                                                                                                                                                  |                                                                                                                                                                                          | Nutrition, and Metabolism                                           |     |                     |
| 1052 | HR Jeon, JS Park.                                                                                                                                                                | [Development and Application of a Self-management Program based on Prothrombin INR Monitoring for Patients with Cardiac Valve Replacement].                                              | Journal of Korean Academy of Nursing                                | No  | NA                  |
| 1063 | M van Vilsteren, CR Boot, JW Twisk, D van Schaardenburg, R Steenbeek, AE Voskuyl, JR Anema.                                                                                      | Effectiveness of an integrated care intervention on supervisor support and work functioning of workers with rheumatoid arthritis.                                                        | Disability and Rehabilitation                                       | Yes | NTR2886             |
| 1073 | DA Kerr, AJ Harray, CM Pollard, SS Dhaliwal, EJ Delp, PA Howat, MR Pickering, Z Ahmad, X Meng, IS Pratt, JL Wright, KR Kerr, CJ Boushey.                                         | The connecting health and technology study: a 6-month randomized controlled trial to improve nutrition behaviours using a mobile food record and text messaging support in young adults. | International Journal of Behavioral Nutrition and Physical Activity | Yes | ACTRN12612000250831 |
| 1083 | AO Ferreira, J Torres, E Barjas, J Nunes, L Glória, R Ferreira, M Rocha, S Pereira, S Dias, AA Santos, M Cravo.                                                                  | Non-anesthesiologist administration of propofol sedation for colonoscopy is safe in low risk patients: results of a noninferiority randomized controlled trial.                          | Endoscopy                                                           | Yes | NCT02067065         |
| 1085 | DT Braga, A Abramovitch, LF Fontenelle, YA Ferrão, JB Gomes, AS Vivan, KK Ecker, CF Bortoncello, A Mittelman, EC Miguel, CM Trentini, AV Cordioli.                               | NEUROPSYCHOLOGICAL PREDICTORS OF TREATMENT RESPONSE TO COGNITIVE BEHAVIORAL GROUP THERAPY IN OBSESSIVE-COMPULSIVE DISORDER.                                                              | Depression and Anxiety                                              | No  | NA                  |
| 1086 | H Baumbach, CJ Rustenbach, S Ahad, R Nagib, M Albert, D Ratge, UF Franke.                                                                                                        | Minimally Invasive Extracorporeal Bypass in Minimally Invasive Heart Valve Operations: A Prospective Randomized Trial.                                                                   | Annals of Thoracic Surgery                                          | No  | NA                  |
| 1101 | G Feixas, A Bados, E García-Grau, C Paz, A Montesano, V Compañ, M Salla, M Aguilera, A Trujillo, J Cañete, L Medeiros-Ferreira, J Soriano, M Ibarra, JC Medina, E Ortiz, F Lana. | A DILEMMA-FOCUSED INTERVENTION FOR DEPRESSION: A MULTICENTER, RANDOMIZED CONTROLLED TRIAL WITH A 3-MONTH FOLLOW-UP.                                                                      | Depression and Anxiety                                              | Yes | NCT01542957         |
| 1103 | E Lau, W Zhou, CJ Henry.                                                                                                                                                         | Effect of fat type in baked bread on amylose-lipid complex formation and glycaemic response.                                                                                             | British Journal of Nutrition                                        | No  | NA                  |
| 1111 | MY Chan, WY Ip, KC Choi.                                                                                                                                                         | The effect of a self-efficacy-based educational programme on maternal breast feeding self-efficacy, breast feeding duration and exclusive breast feeding rates: A longitudinal study.    | Midwifery                                                           | No  | NA                  |
| 1113 | JA van der Woude, K Wiegant, RJ van Heerwaarden, S Spruijt, PM van Roermund, RJ Custers, SC Mastbergen, FP Lafeber.                                                              | Knee joint distraction compared with high tibial osteotomy: a randomized controlled trial.                                                                                               | Knee Surgery, Sports Traumatology, Arthroscopy                      | Yes | NTR2900             |
| 1123 | AN Tanidir, MS Atac, E Karacelebi.                                                                                                                                               | Information given by multimedia: influence on anxiety about extraction of impacted wisdom teeth.                                                                                         | British Journal of Oral and                                         | No  | NA                  |

|      |                                                                                                          |                                                                                                                                                                                             |                                                     |     |             |
|------|----------------------------------------------------------------------------------------------------------|---------------------------------------------------------------------------------------------------------------------------------------------------------------------------------------------|-----------------------------------------------------|-----|-------------|
|      |                                                                                                          |                                                                                                                                                                                             | Maxillofacial Surgery                               |     |             |
| 1134 | C Li, HB Zhang, H Zhang, Q Li, J Zhang, J Wang, KJ Guo, LX Wang.                                         | Severe pathological fractures caused by vertebral hemangiomas with posterior decompression, bone cement augmentation and internal fixation.                                                 | Orthopaedics and Traumatology: Surgery and Research | No  | NA          |
| 1147 | V Kaufman-Shriqui, D Fraser, M Friger, D Geva, N Bilenko, H Vardi, N Elhadad, K Mor, Z Feine, DR Shahar. | Effect of a School-Based Intervention on Nutritional Knowledge and Habits of Low-Socioeconomic School Children in Israel: A Cluster-Randomized Controlled Trial.                            | Nutrients                                           | Yes | NCT01071551 |
| 1172 | WJ Ma, ZH Huang, BX Huang, BH Qi, YJ Zhang, BX Xiao, YH Li, L Chen, HL Zhu.                              | Intensive low-glycaemic-load dietary intervention for the management of glycaemia and serum lipids among women with gestational diabetes: a randomized control trial.                       | Public Health Nutrition                             | No  | NA          |
| 1174 | SA McClave, MA Saad, M Esterle, M Anderson, AE Jotautas, GA Franklin, DK Heyland, RT Hurt.               | Volume-Based Feeding in the Critically Ill Patient.                                                                                                                                         | Journal of Parenteral and Enteral Nutrition         | No  | NA          |
| 1179 | TG Heckman, BD Heckman, T Anderson, TI Lovejoy, JC Markowitz, Y Shen, M Sutton.                          | Tele-Interpersonal Psychotherapy Acutely Reduces Depressive Symptoms in Depressed HIV Infected Rural Persons: A Randomized Clinical Trial.                                                  | Behavioral Medicine                                 | Yes | NCT02299453 |
| 1190 | M Kekäle, T Söderlund, P Koskenvesa, K Talvensaari, M Airaksinen.                                        | Impact of tailored patient education on adherence of patients with chronic myeloid leukaemia to tyrosine kinase inhibitors: a randomized multicentre intervention study.                    | Journal of Advanced Nursing                         | No  | NA          |
| 1197 | D Aydin, NC Şahiner, EK Çiftçi.                                                                          | Comparison of the effectiveness of three different methods in decreasing pain during venipuncture in children: ball squeezing, balloon inflating and distraction cards.                     | Journal of Clinical Nursing                         | No  | NA          |
| 1198 | A Smeatham, R Powell, S Moore, R Chauhan, M Wilson.                                                      | Does treatment by a specialist physiotherapist change pain and function in young adults with symptoms from femoroacetabular impingement? A pilot project for a randomised controlled trial. | Physiotherapy                                       | No  | NA          |
| 1201 | FS da Silva, FE de Melo, MM do Amaral, VV Caldas, ÍL Pinheiro, BJ Abreu, WH Vieira.                      | Efficacy of simple integrated group rehabilitation program for patients with knee osteoarthritis: Single-blind randomized controlled trial.                                                 | Journal of Rehabilitation Research and Development  | Yes | NCT01850862 |
| 1212 | BG Kurowski, J Hugentobler, C Quatman-Yates, J Taylor, PJ Gubanich, M Altaye, SL Wade.                   | Aerobic Exercise for Adolescents With Prolonged Symptoms After Mild Traumatic Brain Injury: An Exploratory Randomized Clinical Trial.                                                       | Journal of Head Trauma Rehabilitation               | Yes | NCT02035579 |

|      |                                                                                                          |                                                                                                                                                                 |                                                        |     |                     |
|------|----------------------------------------------------------------------------------------------------------|-----------------------------------------------------------------------------------------------------------------------------------------------------------------|--------------------------------------------------------|-----|---------------------|
| 1215 | T Calliess, K Bauer, C Stukenborg-Colsman, H Windhagen, S Budde, M Ettinger.                             | PSI kinematic versus non-PSI mechanical alignment in total knee arthroplasty: a prospective, randomized study.                                                  | Knee Surgery, Sports Traumatology, Arthroscopy         | No  | NA                  |
| 1222 | H Feng, G Li, C Xu, C Ju, X Qiu.                                                                         | Training Rehabilitation as an Effective Treatment for Patients with Vascular Cognitive Impairment with No Dementia.                                             | Rehabilitation Nursing                                 | No  | NA                  |
| 1233 | S Ishii, N Osaki, A Shimotoyodome.                                                                       | The Effects of a Hypocaloric Diet on Diet-Induced Thermogenesis and Blood Hormone Response in Healthy Male Adults: A Pilot Study.                               | Journal of Nutritional Science and Vitaminology        | No  | NA                  |
| 1239 | OP Johnson, RW Langford.                                                                                 | A Randomized Trial of a Bereavement Intervention for Pregnancy Loss.                                                                                            | Journal of Obstetric, Gynecologic and Neonatal Nursing | No  | NA                  |
| 1248 | V Trikha, P Saini, P Mathur, A Agarwal, SV Kumar, B Choudhary.                                           | Single versus double blade technique for skin incision and deep dissection in surgery for closed fracture: a prospective randomised control study.              | Journal of Orthopaedic Surgery                         | Yes | CTRI/2013/04/003599 |
| 1256 | TN Robinson, EL Jones, CL Dunn, B Dunne, E Johnson, NT Townsend, A Paniccia, GV Stiegmann.               | Separating the Laparoscopic Camera Cord From the Monopolar "Bovie" Cord Reduces Unintended Thermal Injury From Antenna Coupling: A Randomized Controlled Trial. | Annals of Surgery                                      | Yes | NCT01707095         |
| 1268 | W Samankasikorn, B Pierce, A St Ivany, SH Gwon, D Schminkey, L Bullock.                                  | Effect of Home Visiting with Pregnant Teens on Maternal Health.                                                                                                 | American Journal of Maternal/Child Nursing             | No  | NA                  |
| 1274 | F Lv, S Zhang, M Ji, Y Wang, P Li, W Han.                                                                | Single-stage management with combined tri-endoscopic approach for concomitant cholecystolithiasis and choledocholithiasis.                                      | Surgical Endoscopy                                     | No  | NA                  |
| 1275 | B Monaghan, P Cunningham, P Harrington, W Hing, C Blake, D O' Dohertya, T Cusack.                        | Randomised controlled trial to evaluate a physiotherapy-led functional exercise programme after total hip replacement.                                          | Physiotherapy                                          | Yes | NCT01683201         |
| 1299 | A Moreno-Egea, A Campillo-Soto, G Morales-Cuenca.                                                        | Does Abdominoplasty Add Morbidity to Incisional Hernia Repair? A Randomized Controlled Trial.                                                                   | Surgical Innovation                                    | Yes | ISRCTN14892408      |
| 1305 | DL Stan, KA Croghan, IT Croghan, SM Jenkins, SJ Sutherland, AL Cheville, S Pruthi.                       | Randomized pilot trial of yoga versus strengthening exercises in breast cancer survivors with cancer-related fatigue.                                           | Supportive Care in Cancer                              | No  | NA                  |
| 1310 | GR Nikrahan, JA Laferton, K Asgari, M Kalantari, MR Abedi, A Etesampour, A Rezaei, L Suarez, JC Huffman. | Effects of Positive Psychology Interventions on Risk Biomarkers in Coronary Patients: A Randomized, Wait-List Controlled Pilot Trial.                           | Psychosomatics                                         | Yes | IRCT2014010516081N1 |



|      |                                                                                                  |                                                                                                                                                                                |                                                        |     |                  |
|------|--------------------------------------------------------------------------------------------------|--------------------------------------------------------------------------------------------------------------------------------------------------------------------------------|--------------------------------------------------------|-----|------------------|
| 1315 | X Liu, W Xu, Y Wang, JM Williams, Y Geng, Q Zhang, X Liu.                                        | Can Inner Peace be Improved by Mindfulness Training: A Randomized Controlled Trial.                                                                                            | Stress and Health                                      | No  | NA               |
| 1317 | K Kempf, H Kolb, B Gärtner, G Bytof, H Stiebitz, I Lantz, R Lang, T Hofmann, S Martin.           | Cardiometabolic effects of two coffee blends differing in content for major constituents in overweight adults: a randomized controlled trial.                                  | European Journal of Nutrition                          | Yes | NCT01759329      |
| 1322 | EA Storch, AB Lewin, AB Collier, E Arnold, AS De Nadai, BF Dane, JM Nadeau, PJ Mutch, TK Murphy. | A randomized controlled trial of cognitive-behavioral therapy versus treatment as usual for adolescents with autism spectrum disorders and comorbid anxiety.                   | Depression and Anxiety                                 | Yes | NCT01563003      |
| 1323 | K Gaudlitz, J Plag, F Dimeo, A Ströhle.                                                          | Aerobic exercise training facilitates the effectiveness of cognitive behavioral therapy in panic disorder.                                                                     | Depression and Anxiety                                 | Yes | NCT01788800      |
| 1325 | SA Rauch, AP King, J Abelson, PW Tuerk, E Smith, BO Rothbaum, E Clifton, A Defever, I Liberzon.  | Biological and symptom changes in posttraumatic stress disorder treatment: a randomized clinical trial.                                                                        | Depression and Anxiety                                 | Yes | NCT00475241      |
| 1326 | MJ Parker.                                                                                       | Lateral versus posterior approach for insertion of hemiarthroplasties for hip fractures: A randomised trial of 216 patients.                                                   | Injury                                                 | No  | NA               |
| 1329 | B Mutlu, S Balci.                                                                                | Effects of balloon inflation and cough trick methods on easing pain in children during the drawing of venous blood samples: a randomized controlled trial.                     | Journal for Specialists in Pediatric Nursing           | No  | NA               |
| 1330 | J Jaipakdee, W Jiamjarasrangsi, V Lohsoonthorn, S Lertmaharit.                                   | Effectiveness of a self-management support program for Thais with type 2 diabetes: Evaluation according to the RE-AIM framework.                                               | Nursing and Health Sciences                            | Yes | TCTR20120000 023 |
| 1340 | C Gonzalez-Anton, MC Rico, E Sanchez-Rodriguez, MD Ruiz-Lopez, A Gil, MD Mesa.                   | Glycemic responses, appetite ratings and gastrointestinal hormone responses of most common breads consumed in Spain. A randomized control trial in healthy humans.             | Nutrients                                              | Yes | NCT02297074      |
| 1343 | AJ Stull, KC Cash, CM Champagne, AK Gupta, R Boston, RA Beyl, WD Johnson, WT Cefalu.             | Blueberries improve endothelial function, but not blood pressure, in adults with metabolic syndrome: a randomized, double-blind, placebo-controlled clinical trial.            | Nutrients                                              | Yes | NCT01399138      |
| 1344 | MP Lopez, MF Melendres, SA Maglangit, MF Roxas, HJ Monroy, AC Crisostomo.                        | A randomized controlled clinical trial comparing the outcomes of circumferential subcuticular wound approximation (CSWA) with conventional wound closure after stoma reversal. | Techniques in Coloproctology                           | No  | NA               |
| 1345 | C Gürsen, M Kerem Günel, S Kaya, T Kav, T Akbayrak.                                              | Effect of Connective Tissue Manipulation on Symptoms and Quality of Life in Patients With Chronic Constipation: A Randomized Controlled Trial.                                 | Journal of Manipulative and Physiological Therapeutics | Yes | NCT02321124      |

|      |                                                                                                                                              |                                                                                                                                                                                      |                                                        |     |                     |
|------|----------------------------------------------------------------------------------------------------------------------------------------------|--------------------------------------------------------------------------------------------------------------------------------------------------------------------------------------|--------------------------------------------------------|-----|---------------------|
| 1349 | KH Satpute, P Bhandari, T Hall.                                                                                                              | Efficacy of Hand Behind Back Mobilization With Movement for Acute Shoulder Pain and Movement Impairment: A Randomized Controlled Trial.                                              | Journal of Manipulative and Physiological Therapeutics | Yes | CTRI/2014/05/004624 |
| 1353 | Q Hu, W Luo, L Huang, R Huang, R Chen, Y Gao.                                                                                                | Multiorgan protection of remote ischemic preconditioning in valve replacement surgery.                                                                                               | Journal of Surgical Research                           | Yes | NCT01476969         |
| 1361 | Y Gao, R Huang, R Chen, J Li, W Luo.                                                                                                         | Ischemic postconditioning altered microRNAs in human valve replacement.                                                                                                              | Journal of Surgical Research                           | Yes | NCT01804283         |
| 1362 | AC Nilsson, EV Johansson-Boll, IM Björck.                                                                                                    | Increased gut hormones and insulin sensitivity index following a 3-d intervention with a barley kernel-based product: a randomised cross-over study in healthy middle-aged subjects. | British Journal of Nutrition                           | Yes | NCT01718431         |
| 1366 | AF Sadek, EH Fouly, MM Elian.                                                                                                                | Lateral plantar nerve release with or without calcaneal drilling for resistant plantar fasciitis.                                                                                    | Journal of Orthopaedic Surgery                         | No  | NA                  |
| 1371 | MB Happ, SM Sereika, MP Houze, JB Seaman, JA Tate, ML Nilsen, J van Panhuis, A Scullli, BM Baumann, B Paull, E George, DC Angus, AE Barnato. | Quality of care and resource use among mechanically ventilated patients before and after an intervention to assist nurse-nonvocal patient communication.                             | Heart and Lung                                         | No  | NA                  |
| 1377 | X Bai, Q Zhang, S Gao, J Lou, G Li, Y Zhang, T Ma, Y Zhang, Y Xu, T Liang.                                                                   | Duct-to-Mucosa vs Invagination for Pancreaticojejunostomy after Pancreaticoduodenectomy: A Prospective, Randomized Controlled Trial from a Single Surgeon.                           | Journal of the American College of Surgeons            | Yes | NCT01695447         |
| 1384 | KM Turner, JB Keogh, PM Clifton.                                                                                                             | Acute effect of red meat and dairy on glucose and insulin: a randomized crossover study.                                                                                             | American Journal of Clinical Nutrition                 | Yes | ACTRN12615000164594 |
| 1396 | M Maroufi, S Zamani, Z Izadikhah, M Marofi, P O'Connor.                                                                                      | Investigating the effect of Eye Movement Desensitization and Reprocessing (EMDR) on postoperative pain intensity in adolescents undergoing surgery: a randomized controlled trial.   | Journal of Advanced Nursing                            | Yes | ACTRN12615000826549 |
| 1401 | L Li, H Tian, Md, W Yue, S Li, C Gao, L Si.                                                                                                  | Subxiphoid vs intercostal single-incision video-assisted thoracoscopic surgery for spontaneous pneumothorax: A Randomised Controlled Trial.                                          | International Journal of Surgery                       | No  | NA                  |
| 1405 | EI Elhinidi, MM Ismaeel, TM El-Saeed.                                                                                                        | Effect of dual-task training on postural stability in children with infantile hemiparesis.                                                                                           | Journal of Physical Therapy Science                    | No  | NA                  |
| 1406 | PN Hwangbo, K Don Kim.                                                                                                                       | Effects of proprioceptive neuromuscular facilitation neck pattern exercise on the ability to control the trunk and maintain balance in chronic stroke patients.                      | Journal of Physical Therapy Science                    | No  | NA                  |

|      |                                                                                                                                                     |                                                                                                                                                                                                                                     |                                     |     |             |
|------|-----------------------------------------------------------------------------------------------------------------------------------------------------|-------------------------------------------------------------------------------------------------------------------------------------------------------------------------------------------------------------------------------------|-------------------------------------|-----|-------------|
| 1407 | JH Park, JH Park.                                                                                                                                   | The effects of game-based virtual reality movement therapy plus mental practice on upper extremity function in chronic stroke patients with hemiparesis: a randomized controlled trial.                                             | Journal of Physical Therapy Science | No  | NA          |
| 1408 | F Küçük, B Kara, EÇ Poyraz, E İdiman.                                                                                                               | Improvements in cognition, quality of life, and physical performance with clinical Pilates in multiple sclerosis: a randomized controlled trial.                                                                                    | Journal of Physical Therapy Science | No  | NA          |
| 1409 | HB Kak, SJ Park, BJ Park.                                                                                                                           | The effect of hip abductor exercise on muscle strength and trunk stability after an injury of the lower extremities.                                                                                                                | Journal of Physical Therapy Science | No  | NA          |
| 1410 | SD Woo, TH Kim, JY Lim.                                                                                                                             | The effects of breathing with mainly inspiration or expiration on pulmonary function and chest expansion.                                                                                                                           | Journal of Physical Therapy Science | No  | NA          |
| 1412 | KS Jung, HY Cho, TS In.                                                                                                                             | Trunk exercises performed on an unstable surface improve trunk muscle activation, postural control, and gait speed in patients with stroke.                                                                                         | Journal of Physical Therapy Science | No  | NA          |
| 1413 | B Im, Y Kim, Y Chung, S Hwang.                                                                                                                      | Effects of scapular stabilization exercise on neck posture and muscle activation in individuals with neck pain and forward head posture.                                                                                            | Journal of Physical Therapy Science | No  | NA          |
| 1415 | LV Duffy, JA Vessey.                                                                                                                                | A Randomized Controlled Trial Testing the Efficacy of the Creating Opportunities for Parent Empowerment Program for Parents of Children With Epilepsy and Other Chronic Neurological Conditions.                                    | Journal of Neuroscience Nursing     | Yes | NCT00767026 |
| 1416 | GF Tuite, EG Polsky, Y Homsy, MA Reilly, CM Carey, S Parrish Winesett, LF Rodriguez, BB Storrs, SJ Gaskill, LL Tetreault, DG Martinez, EK Amankwah. | Lack of efficacy of an intradural somatic-to-autonomic nerve anastomosis (Xiao procedure) for bladder control in children with myelomeningocele and lipomyelomeningocele: results of a prospective, randomized, double-blind study. | Journal of Neurosurgery: Pediatrics | No  | NA          |
| 1420 | H Niela-Vilén, A Axelin, HL Melender, E Löyttyniemi, S Salanterä.                                                                                   | Breastfeeding preterm infants - a randomized controlled trial of the effectiveness of an Internet-based peer-support group.                                                                                                         | Journal of Advanced Nursing         | Yes | NCT02580786 |
| 1423 | A Firouzjaei, GC Li, N Wang, WX Liu, BM Zhu.                                                                                                        | Comparative evaluation of the therapeutic effect of metformin monotherapy with metformin and acupuncture combined therapy on weight loss and insulin sensitivity in diabetic patients.                                              | Nutrition and Diabetes              | Yes | NCT02438540 |
| 1441 | KH Webber, EM Casey, L Mayes, Y Katsumata, L Mellin.                                                                                                | A comparison of a behavioral weight loss program to a stress management program: A pilot randomized controlled trial.                                                                                                               | Nutrition                           | Yes | NCT02023515 |

|      |                                                                                                                 |                                                                                                                                                                                                                                  |                                                          |     |                     |
|------|-----------------------------------------------------------------------------------------------------------------|----------------------------------------------------------------------------------------------------------------------------------------------------------------------------------------------------------------------------------|----------------------------------------------------------|-----|---------------------|
| 1446 | GR Nikrahan, L Suarez, K Asgari, SR Beach, CM Celano, M Kalantari, MR Abedi, A Etesampour, R Abbas, JC Huffman. | Positive Psychology Interventions for Patients With Heart Disease: A Preliminary Randomized Trial.                                                                                                                               | Psychosomatics                                           | Yes | IRCT2014010516081N1 |
| 1452 | DG Theodoros, AJ Hill, TG Russell.                                                                              | Clinical and Quality of Life Outcomes of Speech Treatment for Parkinson's Disease Delivered to the Home Via Telerehabilitation: A Noninferiority Randomized Controlled Trial.                                                    | American Journal of Speech-Language Pathology            | No  | NA                  |
| 1453 | D Victorson, V Hankin, J Burns, R Weiland, C Maletich, N Sufrin, S Schuette, B Gutierrez, C Brendler.           | Feasibility, acceptability and preliminary psychological benefits of mindfulness meditation training in a sample of men diagnosed with prostate cancer on active surveillance: results from a randomized controlled pilot trial. | Psycho-Oncology                                          | No  | NA                  |
| 1456 | FE Aboud, K Bougma, T Lemma, GS Marquis.                                                                        | Evaluation of the effects of iodized salt on the mental development of preschool-aged children: a cluster randomized trial in northern Ethiopia.                                                                                 | Maternal and Child Nutrition                             | Yes | NCT01349634         |
| 1458 | EE Steury.                                                                                                      | Mobile Phone Short Message Service to Improve Malaria Pharmacoadherence in Zambia.                                                                                                                                               | Journal of Nursing Scholarship                           | No  | NA                  |
| 1472 | S Tucker, M Farrington, LM Lanningham-Foster, MK Clark, C Dawson, GJ Quinn, T Laffoon, Y Perkhounkova.          | Worksite Physical Activity Intervention for Ambulatory Clinic Nursing Staff.                                                                                                                                                     | Workplace Health and Safety                              | No  | NA                  |
| 1484 | BJ Choi, WJ Jeong, IK Lee, SC Lee.                                                                              | Single-port versus conventional three-port laparoscopic totally extraperitoneal inguinal hernia repair: a randomized controlled trial.                                                                                           | Hernia                                                   | No  | NA                  |
| 1487 | E Aitken, E Jeans, M Aitken, D Kingsmore.                                                                       | A randomized controlled trial of interrupted versus continuous suturing techniques for radiocephalic fistulas.                                                                                                                   | Journal of Vascular Surgery                              | Yes | NCT01704313         |
| 1488 | C Feldthusen, E Dean, H Forsblad-d'Elia, K Mannerkorpi.                                                         | Effects of Person-Centered Physical Therapy on Fatigue-Related Variables in Persons With Rheumatoid Arthritis: A Randomized Controlled Trial.                                                                                    | Archives of Physical Medicine and Rehabilitation         | Yes | NCT02120963         |
| 1490 | KL Best, WC Miller, G Huston, F Routhier, JJ Eng.                                                               | Pilot Study of a Peer-Led Wheelchair Training Program to Improve Self-Efficacy Using a Manual Wheelchair: A Randomized Controlled Trial.                                                                                         | Archives of Physical Medicine and Rehabilitation         | Yes | NCT01837888         |
| 1501 | A Austel, C Ranke, N Wagner, J Gorge, T Ellrott.                                                               | Weight loss with a modified Mediterranean-type diet using fat modification: a randomized controlled trial.                                                                                                                       | European Journal of Clinical Nutrition                   | No  | NA                  |
| 1513 | MC Chen, KM Chen, CL Chang, YH Chang, YY Cheng, HT Huang.                                                       | Elastic Band Exercises Improved Activities of Daily Living and Functional Fitness of Wheelchair-bound Older Adults with Cognitive Impairment: A Cluster Randomized Controlled Trial.                                             | American Journal of Physical Medicine and Rehabilitation | Yes | NCT02164617         |

|      |                                                                                                                                                                                |                                                                                                                                                                                            |                                                |     |                         |
|------|--------------------------------------------------------------------------------------------------------------------------------------------------------------------------------|--------------------------------------------------------------------------------------------------------------------------------------------------------------------------------------------|------------------------------------------------|-----|-------------------------|
| 1527 | G Tuinmann, P Preissler, H Böhmer, A Suling, C Bokemeyer.                                                                                                                      | The effects of music therapy in patients with high-dose chemotherapy and stem cell support: a randomized pilot study.                                                                      | Psycho-Oncology                                | No  | NA                      |
| 1528 | C Atkinson, CM Penfold, AR Ness, RJ Longman, SJ Thomas, W Hollingworth, R Kandiyali, SD Leary, SJ Lewis.                                                                       | Randomized clinical trial of postoperative chewing gum versus standard care after colorectal resection.                                                                                    | British Journal of Surgery                     | Yes | ISRCTN55784442          |
| 1530 | T Bartels, S Proeger, K Brehme, M Pyschik, KS Delank, S Schulze, R Schwesig, G Fieseler.                                                                                       | The SpeedCourt system in rehabilitation after reconstruction surgery of the anterior cruciate ligament (ACL).                                                                              | Archives of Orthopaedic and Trauma Surgery     | No  | NA                      |
| 1531 | KM Keane, TW George, CL Constantinou, MA Brown, T Clifford, G Howatson.                                                                                                        | Effects of Montmorency tart cherry (Prunus Cerasus L.) consumption on vascular function in men with early hypertension.                                                                    | American Journal of Clinical Nutrition         | Yes | NCT02234648             |
| 1550 | F Bertz, CR Pacanowski, DA Levitsky.                                                                                                                                           | Frequent Self-Weighing with Electronic Graphic Feedback to Prevent Age-Related Weight Gain in Young Adults.                                                                                | Obesity                                        | No  | NA                      |
| 1551 | TZ Petry, E Fabbrini, JP Otoch, MA Carmona, PP Caravatto, JE Salles, T Sarian, JL Correa, CA Schiavon, BW Patterson, R Cohen, S Klein.                                         | Effect of Duodenal-jejunal Bypass Surgery on Glycemic Control in Type 2 Diabetes: A Randomized Controlled Trial.                                                                           | Obesity                                        | Yes | NCT01771185             |
| 1552 | LG Svensson, EH Blackstone, C Apperson-Hansen, PM Ruggieri, P Ainkaran, RI Naugle, B Lima, EE Roselli, M Cooper, D Somogyi, EM Tuzcu, S Kapadia, DG Clair, JF Sabik, BW Lytle. | Implications from neurologic assessment of brain protection for total arch replacement from a randomized trial.                                                                            | Journal of Thoracic and Cardiovascular Surgery | Yes | NCT00606190             |
| 1554 | SD de Ferranti, CE Milliren, ER Denhoff, N Quinn, SK Osganian, HA Feldman, CB Ebbeling, DS Ludwig.                                                                             | Providing food to treat adolescents at risk for cardiovascular disease.                                                                                                                    | Obesity                                        | Yes | NCT01080339;NCT00477477 |
| 1581 | C Unterhofer, CF Freyschlag, C Thomé, M Ortler.                                                                                                                                | Opening the Internal Hematoma Membrane does not Alter the Recurrence Rate of Chronic Subdural Hematomas - A Prospective Randomized Trial.                                                  | World Neurosurgery                             | No  | NA                      |
| 1583 | Y Matsuda, T Morimoto, S Furukawa, S Sato, N Hatsuse, K Iwata, M Kimura, T Kishimoto, E Ikebuchi.                                                                              | Feasibility and effectiveness of a cognitive remediation programme with original computerised cognitive training and group intervention for schizophrenia: a multicentre randomised trial. | Neuropsychological Rehabilitation              | No  | NA                      |
| 1590 | AC Roxo, FX Nahas, R Salin, CC de Castro, JH Aboudib, RG Marques.                                                                                                              | Volumetric Evaluation of the Mammary Gland and Pectoralis Major Muscle following Subglandular and Submuscular Breast Augmentation.                                                         | Plastic and Reconstructive Surgery             | No  | NA                      |
| 1594 | G Seguranyes, D Costa, C Fuentelsaz-Gallego, JV Beneit, D Carabantes, C Gómez-Moreno, A Palacio-Tauste, A Pauli, M Abella, .                                                   | Efficacy of a videoconferencing intervention compared with standard postnatal care at primary care health centres in Catalonia.                                                            | Midwifery                                      | No  | NA                      |

|      |                                                                                       |                                                                                                                                                                                                                                |                                      |     |               |
|------|---------------------------------------------------------------------------------------|--------------------------------------------------------------------------------------------------------------------------------------------------------------------------------------------------------------------------------|--------------------------------------|-----|---------------|
| 1595 | J Mejdoubi, SC van den Heijkant, FJ van Leerdam, M Crone, A Crijnen, RA HiraSing.     | Effects of nurse home visitation on cigarette smoking, pregnancy outcomes and breastfeeding: a randomized controlled trial.                                                                                                    | Midwifery                            | Yes | NTR854        |
| 1597 | AC Clarke-Jenssen, AM Mengshoel, YS Strumse, KO Forseth.                              | Effect of a fibromyalgia rehabilitation programme in warm versus cold climate: a randomized controlled study.                                                                                                                  | Journal of Rehabilitation Medicine   | No  | NA            |
| 1600 | I Lee.                                                                                | The effect of postural control intervention for congenital muscular torticollis: a randomized controlled trial.                                                                                                                | Clinical Rehabilitation              | No  | NA            |
| 1603 | K Tomori, H Nagayama, K Ohno, R Nagatani, Y Saito, K Takahashi, T Sawada, T Higashi.  | Comparison of occupation-based and impairment-based occupational therapy for subacute stroke: a randomized controlled feasibility study.                                                                                       | Clinical Rehabilitation              | Yes | UMIN000012994 |
| 1604 | W Choi, G Lee, S Lee.                                                                 | Effect of the cognitive-motor dual-task using auditory cue on balance of survivors with chronic stroke: a pilot study.                                                                                                         | Clinical Rehabilitation              | No  | NA            |
| 1605 | V Tsianakas, G Robert, A Richardson, R Verity, C Oakley, T Murrells, M Flynn, E Ream. | Enhancing the experience of carers in the chemotherapy outpatient setting: an exploratory randomised controlled trial to test impact, acceptability and feasibility of a complex intervention co-designed by carers and staff. | Supportive Care in Cancer            | No  | NA            |
| 1614 | SH Kwon.                                                                              | Wheel of Wellness Counseling in Community Dwelling, Korean Elders: A Randomized, Controlled Trial.                                                                                                                             | Journal of Korean Academy of Nursing | No  | NA            |
| 1616 | T Koç, D Gözen.                                                                       | The Effect of Foot Reflexology on Acute Pain in Infants: A Randomized Controlled Trial.                                                                                                                                        | Worldviews on Evidence-Based Nursing | No  | NA            |
| 1618 | G Demirel, H Guler.                                                                   | The Effect of Uterine and Nipple Stimulation on Induction With Oxytocin and the Labor Process.                                                                                                                                 | Worldviews on Evidence-Based Nursing | No  | NA            |
| 1620 | E Snelgrove-Clarke, B Davies, G Flowerdew, D Young.                                   | Implementing a Fetal Health Surveillance Guideline in Clinical Practice: A Pragmatic Randomized Controlled Trial of Action Learning.                                                                                           | Worldviews on Evidence-Based Nursing | No  | NA            |
| 1628 | C Olsen, I Pedersen, A Bergland, MJ Enders-Slegers, C Ihlebæk.                        | Effect of animal-assisted activity on balance and quality of life in home-dwelling persons with dementia.                                                                                                                      | Geriatric Nursing                    | Yes | NCT02008630   |
| 1631 | CD Darker, B Sweeney, E Keenan, L Whiston, R Anderson, J Barry.                       | Screening and Brief Interventions for Illicit Drug Use and Alcohol Use in Methadone Maintained Opiate-Dependent Patients: Results of a Pilot Cluster Randomized Controlled Trial Feasibility Study.                            | Substance Use and Misuse             | No  | NA            |

|      |                                                                                                                                                      |                                                                                                                                                                                |                                                        |     |                      |
|------|------------------------------------------------------------------------------------------------------------------------------------------------------|--------------------------------------------------------------------------------------------------------------------------------------------------------------------------------|--------------------------------------------------------|-----|----------------------|
| 1640 | MY Song, JH Wang, T Eom, H Kim.                                                                                                                      | Schisandra chinensis fruit modulates the gut microbiota composition in association with metabolic markers in obese women: a randomized, double-blind placebo-controlled study. | Nutrition Research                                     | Yes | KCT0000649           |
| 1675 | LR Russo, MG Benedetti, E Mariani, T Roberti di Sarsina, S Zaffagnini.                                                                               | The Videoinight(®) Method: improving early results following total knee arthroplasty.                                                                                          | Knee Surgery, Sports Traumatology, Arthroscopy         | No  | NA                   |
| 1683 | T Kawasaki, T Higuchi.                                                                                                                               | Improvement of Postural Stability During Quiet Standing Obtained After Mental Rotation of Foot Stimuli.                                                                        | Journal of Motor Behavior                              | No  | NA                   |
| 1684 | N Santaularia, J Caminal, A Arnau, M Perramon, J Montesinos, M Abenoza Guardiola, T Jaarsma.                                                         | The efficacy of a supervised exercise training programme on readmission rates in patients with myocardial ischemia: results from a randomised controlled trial.                | European Journal of Cardiovascular Nursing             | Yes | ISRCTN57634424       |
| 1702 | A Prodeus, V Niborski, J Schrezenmeir, A Gorelov, A Shcherbina, A Rummyantsev.                                                                       | Fermented Milk Consumption and Common Infections in Children Attending Day-care Centers. A Randomized Trial.                                                                   | Journal of Pediatric Gastroenterology and Nutrition    | Yes | NCT01200173          |
| 1705 | A Mendigutia-Gómez, C Martín-Hernández, J Salom-Moreno, C Fernández-de-Las-Peñas.                                                                    | Effect of Dry Needling on Spasticity, Shoulder Range of Motion, and Pressure Pain Sensitivity in Patients With Stroke: A Crossover Study.                                      | Journal of Manipulative and Physiological Therapeutics | Yes | NCT02377804          |
| 1706 | HM Elhafez, SM Elhafez.                                                                                                                              | Axillary Ultrasound and Laser Combined with Postisometric Facilitation in Treatment of Shoulder Adhesive Capsulitis: A Randomized Clinical Trial.                              | Journal of Manipulative and Physiological Therapeutics | Yes | PACTR201304000516174 |
| 1719 | JD Krebs, A Parry Strong, P Cresswell, AN Reynolds, A Hanna, S Haeusler.                                                                             | A randomised trial of the feasibility of a low carbohydrate diet vs standard carbohydrate counting in adults with type 1 diabetes taking body weight into account.             | Asia Pacific Journal of Clinical Nutrition             | Yes | ACTRN12612001138875  |
| 1733 | AC Palmer, W Siamusantu, J Chileshe, KJ Schulze, M Barffour, NE Craft, N Molobeka, N Kalungwana, MA Arguello, M Mitra, B Caswell, RD Klemm, KP West. | Provitamin A-biofortified maize increases serum $\beta$ -carotene, but not retinol, in marginally nourished children: a cluster-randomized trial in rural Zambia.              | American Journal of Clinical Nutrition                 | Yes | NCT01695148          |
| 1734 | G Lindseth, A Murray.                                                                                                                                | Dietary Macronutrients and Sleep.                                                                                                                                              | Western Journal of Nursing Research                    | No  | NA                   |
| 1737 | MH Halliday, E Pappas, MJ Hancock, HA Clare, RZ Pinto, G Robertson, PH Ferreira.                                                                     | A Randomized Controlled Trial Comparing the McKenzie Method to Motor Control Exercises in                                                                                      | Journal of Orthopaedic and                             | Yes | ACTRN12611000971932  |

|      |                                                                                                                         |                                                                                                                                                                                                                                                   |                                                          |     |                |
|------|-------------------------------------------------------------------------------------------------------------------------|---------------------------------------------------------------------------------------------------------------------------------------------------------------------------------------------------------------------------------------------------|----------------------------------------------------------|-----|----------------|
|      |                                                                                                                         | People With Chronic Low Back Pain and a Directional Preference.                                                                                                                                                                                   | Sports Physical Therapy                                  |     |                |
| 1745 | C Røe, L Preede, H Dalen, E Bautz-Holter, A Nyquist, L Sandvik, M Saebu.                                                | Does adapted physical activity-based rehabilitation improve mental and physical functioning? A randomized trial.                                                                                                                                  | European Journal of Physical and Rehabilitation Medicine | Yes | NCT01788397    |
| 1746 | Y Liu, L Mo, Y Tang, Q Wang, X Huang.                                                                                   | The Application of an Evidence-Based Clinical Nursing Path for Improving the Preoperative and Postoperative Quality of Care of Pediatric Retroperitoneal Neuroblastoma Patients: A Randomized Controlled Trial at a Tertiary Medical Institution. | Cancer Nursing                                           | No  | NA             |
| 1754 | L Béghin, S Coopman, M Schiff, J Vamecq, K Mention-Mulliez, R Hankard, JM Cuisset, H Ogier, F Gottrand F, D Dobbelaere. | Doubling diet fat on sugar ratio in children with mitochondrial OXPHOS disorders: Effects of a randomized trial on resting energy expenditure, diet induced thermogenesis and body composition.                                                   | Clinical Nutrition                                       | Yes | NCT02385565    |
| 1764 | PA Ribeiro, E Normandin, P Meyer, M Juneau, A Nigam, M Gayda.                                                           | Comparison of Carbohydrate and Lipid Oxidation During Different High-Intensity Interval Exercise in Patients with Chronic Heart Failure.                                                                                                          | Archives of Physical Medicine and Rehabilitation         | No  | NA             |
| 1765 | M Gouda, A Moustafa, L Hussein, M Hamza.                                                                                | Three week dietary intervention using apricots, pomegranate juice or/and fermented sour sobya and impact on biomarkers of antioxidative activity, oxidative stress and erythrocytic glutathione transferase activity among adults.                | Nutrition Journal                                        | No  | NA             |
| 1766 | PC Diedrichs, MJ Atkinson, KM Garbett, H Williamson, E Halliwell, N Rumsey, G Leckie, CG Sibley, FK Barlow.             | Randomized Controlled Trial of an Online Mother-Daughter Body Image and Well-Being Intervention.                                                                                                                                                  | Health Psychology                                        | Yes | ISRCTN57308485 |
| 1768 | AG Whitty, AJ Murphy, AJ Coutts, ML Watsford.                                                                           | The effect of low- vs high-cadence interval training on the freely chosen cadence and performance in endurance-trained cyclists.                                                                                                                  | Applied Physiology, Nutrition, and Metabolism            | No  | NA             |
| 1776 | C Morén, AK Welmer, M Hagströmer, E Karlsson, DK Sommerfeld.                                                            | The Effects of "Physical Activity on Prescription" in Persons With Transient Ischemic Attack: A Randomized Controlled Study.                                                                                                                      | Journal of Neurologic Physical Therapy                   | Yes | NCT01509924    |
| 1777 | P Klentrou, A Giannopoulou, BJ McKinlay, P Wallace, C Muir, B Falk, D Mack.                                             | Salivary cortisol and testosterone responses to resistance and plyometric exercise in 12- to 14-year-old boys.                                                                                                                                    | Applied Physiology, Nutrition, and Metabolism            | No  | NA             |



|      |                                                                                                                               |                                                                                                                                                                                                  |                                                   |     |                |
|------|-------------------------------------------------------------------------------------------------------------------------------|--------------------------------------------------------------------------------------------------------------------------------------------------------------------------------------------------|---------------------------------------------------|-----|----------------|
| 1789 | MA Yadegary, FG Maemodan, ND Nayeri, A Ghanjekhanlo.                                                                          | The effect of self-management training on health-related quality of life in patients with epilepsy.                                                                                              | Epilepsy and Behavior                             | No  | NA             |
| 1794 | AA Zakaria, RB Kiningham, A Sen.                                                                                              | Effects of Static and Dynamic Stretching on Injury Prevention in High School Soccer Athletes: A Randomized Trial.                                                                                | Journal of Sport Rehabilitation                   | No  | NA             |
| 1795 | S Saal, C Becker, S Lorenz, M Schubert, O Kuss, A Stang, T Müller, A Kraft, J Behrens.                                        | Effect of a stroke support service in Germany: a randomized trial.                                                                                                                               | Topics in Stroke Rehabilitation                   | Yes | NCT00687869    |
| 1796 | OH Kwon, Y Woo, JS Lee, KH Kim.                                                                                               | Effects of task-oriented treadmill-walking training on walking ability of stroke patients.                                                                                                       | Topics in Stroke Rehabilitation                   | No  | NA             |
| 1800 | I Abellán, V López, J Lujan, J Abrisqueta, Q Hernández, MD Frutos, P Parrilla.                                                | Stapling Versus Hand Suture for Gastroenteric Anastomosis in Roux-en-Y Gastric Bypass: a Randomized Clinical Trial.                                                                              | Obesity Surgery                                   | Yes | NCT02077517    |
| 1805 | M Clari, S Frigerio, F Ricceri, A Pici, R Alvaro, V Dimonte.                                                                  | Follow-up telephone calls to patients discharged after undergoing orthopaedic surgery: double-blind, randomised controlled trial of efficacy.                                                    | Journal of Clinical Nursing                       | No  | NA             |
| 1806 | B Feigel-Guiller, D Drui, J Dimet, Y Zair, M Le Bras, N Fuertes-Zamorano, B Cariou, E Letessier, E Nobécourt-Dupuy, M Krempf. | Laparoscopic Gastric Banding in Obese Patients with Sleep Apnea: A 3-Year Controlled Study and Follow-up After 10 Years.                                                                         | Obesity Surgery                                   | No  | NA             |
| 1814 | MA Johanson, M Armstrong, C Hopkins, ML Keen, M Robinson, S Stephenson.                                                       | Gastrocnemius Stretching Program: More Effective in Increasing Ankle/Rear-Foot Dorsiflexion When Subtalar Joint Positioned in Pronation Than in Supination.                                      | Journal of Sport Rehabilitation                   | No  | NA             |
| 1818 | PJ Liu, JR Bettman, AR Uhalde, PA Ubel.                                                                                       | 'How many calories are in my burrito?' Improving consumers' understanding of energy (calorie) range information.                                                                                 | Public Health Nutrition                           | No  | NA             |
| 1824 | LA Sarmiento, JS Pinto, AP da Silva, CM Cabral, LD Chiavegato.                                                                | Effect of conventional physical therapy and Pilates in functionality, respiratory muscle strength and ability to exercise in hospitalized chronic renal patients: A randomized controlled trial. | Clinical Rehabilitation                           | Yes | RBR-96JRM5     |
| 1848 | T Matsuo, R So, N Shimojo, K Tanaka.                                                                                          | Effect of aerobic exercise training followed by a low-calorie diet on metabolic syndrome risk factors in men.                                                                                    | Nutrition, Metabolism and Cardiovascular Diseases | Yes | UMIN11352      |
| 1849 | J Yorke, M Lloyd-Williams, J Smith, F Blackhall, A Harle, J Warden, J Ellis, M Pilling, J Haines, K Luker, A Molassiotis.     | Management of the respiratory distress symptom cluster in lung cancer: a randomised controlled feasibility trial.                                                                                | Supportive Care in Cancer                         | Yes | ISRCTN13173844 |
| 1850 | L Baila-Rueda, R Mateo-Gallego, S Pérez-Calahorra, I Lamiquiz-Moneo, I de Castro-Orós, A Cenarro, F Civeira.                  | Effect of different fat-enriched meats on non-cholesterol sterols and oxysterols as markers of                                                                                                   | Nutrition, Metabolism and                         | Yes | NCT02259153    |

|      |                                                                                                                                                                                                          |                                                                                                                                                                                                     |                                                                             |     |                    |
|------|----------------------------------------------------------------------------------------------------------------------------------------------------------------------------------------------------------|-----------------------------------------------------------------------------------------------------------------------------------------------------------------------------------------------------|-----------------------------------------------------------------------------|-----|--------------------|
|      |                                                                                                                                                                                                          | cholesterol metabolism: Results of a randomized and cross-over clinical trial.                                                                                                                      | Cardiovascular Diseases                                                     |     |                    |
| 1859 | N Gonik, A Tassler, TJ Ow, RV Smith, S Shuaib, HW Cohen, C Sarta, BA Schiff.                                                                                                                             | Randomized Controlled Trial Assessing the Feasibility of Shortened Fasts in Intubated ICU Patients Undergoing Tracheotomy.                                                                          | Otolaryngology - Head and Neck Surgery                                      | No  | NA                 |
| 1878 | D Fuchs, J Nyakayiru, R Draijer, TP Mulder, MT Hopman, TM Eijsvogels, DH Thijssen.                                                                                                                       | Impact of flavonoid-rich black tea and beetroot juice on postprandial peripheral vascular resistance and glucose homeostasis in obese, insulin-resistant men: a randomized controlled trial.        | Nutrition and Metabolism                                                    | Yes | NCT01746329        |
| 1880 | H Feng, XW Zhao, Z Zhang, DP Han, ZH Mao, AG Lu, WE Thasler.                                                                                                                                             | Laparoscopic Complete Mesocolic Excision for StageII/III Left-Sided Colon Cancers: A Randomized Control Study and Comparison with D3 Lymph Node Dissection.                                         | Journal of Laparoendoscopic and Advanced Surgical Techniques and Videoscopy | No  | NA                 |
| 1881 | D Kos, M Duportail, J Meirte, M Meeus, MB D'hooghe, G Nagels, B Willekens, T Meurrens, S Ilsbrouckx, J Nijs.                                                                                             | The effectiveness of a self-management occupational therapy intervention on activity performance in individuals with multiple sclerosis-related fatigue: a randomized-controlled trial.             | International Journal of Rehabilitation Research                            | Yes | NCT01512329        |
| 1887 | MM Wentink, MA Berger, AJ de Kloet, J Meesters, GP Band, R Wolterbeek, PH Goossens, TP Vliet Vlieland.                                                                                                   | The effects of an 8-week computer-based brain training programme on cognitive functioning, QoL and self-efficacy after stroke.                                                                      | Neuropsychological Rehabilitation                                           | No  | NA                 |
| 1890 | MN Bremner, BJ Blake, VD Wagner, SM Pearcey.                                                                                                                                                             | Effects of Reiki With Music Compared to Music Only Among People Living With HIV.                                                                                                                    | Journal of the Association of Nurses in AIDS Care                           | No  | NA                 |
| 1903 | N Watson, K Dyer, J Buckley, G Brinkworth, A Coates, G Parfitt, P Howe, M Noakes, K Murphy.                                                                                                              | Effects of Low-Fat Diets Differing in Protein and Carbohydrate Content on Cardiometabolic Risk Factors during Weight Loss and Weight Maintenance in Obese Adults with Type 2 Diabetes.              | Nutrients                                                                   | Yes | ACTRN1261300008729 |
| 1905 | LS Redwine, BL Henry, MA Pung, K Wilson, K Chinh, B Knight, S Jain, T Rutledge, B Greenberg, A Maisel, PJ Mills.                                                                                         | Pilot Randomized Study of a Gratitude Journaling Intervention on Heart Rate Variability and Inflammatory Biomarkers in Patients With Stage B Heart Failure.                                         | Psychosomatic Medicine                                                      | Yes | NCT01615094        |
| 1906 | C Herrmann-Lingen, ME Beutel, A Bosbach, HC Deter, K Fritzsche, M Hellmich, J Jordan, J Jünger, KH Ladwig, M Michal, K Petrowski, B Pieske, J Ronel, W Söllner, A Stöhr, C Weber, M de Zwaan, C Albus, . | Stepwise Psychotherapy Intervention for Reducing Risk in Coronary Artery Disease: Results of an Observer-Blinded, Multicenter, Randomized Trial in Depressed Patients With Coronary Artery Disease. | Psychosomatic Medicine                                                      | Yes | NCT00705965        |

|      |                                                                                                                                                                                                     |                                                                                                                                                                                 |                                           |     |                    |
|------|-----------------------------------------------------------------------------------------------------------------------------------------------------------------------------------------------------|---------------------------------------------------------------------------------------------------------------------------------------------------------------------------------|-------------------------------------------|-----|--------------------|
| 1912 | LS Kilpela, K Blomquist, C Verzijl, S Wilfred, R Beyl, CB Becker.                                                                                                                                   | The body project 4 all: A pilot randomized controlled trial of a mixed-gender dissonance-based body image program.                                                              | International Journal of Eating Disorders | No  | NA                 |
| 1921 | SA Johns, LF Brown, K Beck-Coon, TL Talib, PO Monahan, RB Giesler, Y Tong, L Wilhelm, JS Carpenter, D Von Ah, CD Wagner, M de Groot, K Schmidt, D Monceski, M Danh, JM Alyea, KD Miller, K Kroenke. | Randomized controlled pilot trial of mindfulness-based stress reduction compared to psychoeducational support for persistently fatigued breast and colorectal cancer survivors. | Supportive Care in Cancer                 | Yes | NCT01919853        |
| 1922 | PE Dos Reis, MA Ciol, NS de Melo, PT Figueiredo, AF Leite, NM Manzi.                                                                                                                                | Chamomile infusion cryotherapy to prevent oral mucositis induced by chemotherapy: a pilot study.                                                                                | Supportive Care in Cancer                 | No  | NA                 |
| 1925 | N Gonçalves, MA Ciol, RA Dantas, JA Farina Junior, LA Rossi.                                                                                                                                        | A randomized controlled trial of an educational programme with telephone reinforcement to improve perceived health status of Brazilian burn victims at 6-month post discharge.  | Journal of Advanced Nursing               | Yes | NCT01379495        |
| 1929 | AH Alghadir, SA Gabr, E Al-Eisa.                                                                                                                                                                    | Cellular fibronectin response to supervised moderate aerobic training in patients with type 2 diabetes.                                                                         | Journal of Physical Therapy Science       | No  | NA                 |
| 1931 | X Sun, Q Gao, H Dou, S Tang.                                                                                                                                                                        | Which is better in the rehabilitation of stroke patients, core stability exercises or conventional exercises?                                                                   | Journal of Physical Therapy Science       | No  | NA                 |
| 1933 | KT Park, HJ Kim.                                                                                                                                                                                    | Effect of the a circuit training program using obstacles on the walking and balance abilities of stroke patients.                                                               | Journal of Physical Therapy Science       | No  | NA                 |
| 1934 | NC Balci, ZO Yuruk, A Zeybek, M Gulsen, MA Tekindal.                                                                                                                                                | Acute effect of scapular proprioceptive neuromuscular facilitation (PNF) techniques and classic exercises in adhesive capsulitis: a randomized controlled trial.                | Journal of Physical Therapy Science       | No  | NA                 |
| 1935 | M Lee, G Han.                                                                                                                                                                                       | The effect of peculiar complex core balance training on isokinetic muscle functions of the knee and lumbus.                                                                     | Journal of Physical Therapy Science       | No  | NA                 |
| 1937 | SJ Park, YM Kim, HR Kim.                                                                                                                                                                            | The effect of hip joint muscle exercise on muscle strength and balance in the knee joint after meniscal injury.                                                                 | Journal of Physical Therapy Science       | No  | NA                 |
| 1939 | SY Cho, HT Roh.                                                                                                                                                                                     | Effects of aerobic exercise training on peripheral brain-derived neurotrophic factor and eotaxin-1 levels in obese young men.                                                   | Journal of Physical Therapy Science       | No  | NA                 |
| 1952 | ME Morris, HB Menz, JL McGinley, JJ Watts, FE Huxham, AT Murphy, ME Danoudis, R Iansek.                                                                                                             | A Randomized Controlled Trial to Reduce Falls in People With Parkinson's Disease.                                                                                               | Neurorehabilitation and Neural Repair     | Yes | ACTRN1260600344594 |

|      |                                                                                                     |                                                                                                                                                                                            |                                                     |     |             |
|------|-----------------------------------------------------------------------------------------------------|--------------------------------------------------------------------------------------------------------------------------------------------------------------------------------------------|-----------------------------------------------------|-----|-------------|
| 1955 | IJ Hubbard, LM Carey, TW Budd, C Levi, P McElduff, S Hudson, G Bateman, MW Parsons.                 | A Randomized Controlled Trial of the Effect of Early Upper-Limb Training on Stroke Recovery and Brain Activation.                                                                          | Neurorehabilitation and Neural Repair               | No  | NA          |
| 1956 | FS Mari, T Di Cesare, L Novi, M Gasparrini, G Berardi, GG Laracca, A Liverani, A Brescia.           | Does ghost ileostomy have a role in the laparoscopic rectal surgery era? A randomized controlled trial.                                                                                    | Surgical Endoscopy                                  | Yes | NCT01861379 |
| 1960 | H Aly, RM Soliman, M El-Dib, RN Said, MA Abdellatif, H Sibaii, A Elwakkad.                          | Does positioning affect tracheal aspiration of gastric content in ventilated infants?                                                                                                      | Journal of Pediatric Gastroenterology and Nutrition | Yes | NCT02016651 |
| 1969 | E Kodesh, I Weissman-Fogel.                                                                         | Exercise-induced hypoalgesia - interval versus continuous mode.                                                                                                                            | Applied Physiology, Nutrition, and Metabolism       | No  | NA          |
| 1970 | JP Little, ME Jung, AE Wright, W Wright, RJ Manders.                                                | Effects of high-intensity interval exercise versus continuous moderate-intensity exercise on postprandial glycemic control assessed by continuous glucose monitoring in obese adults.      | Applied Physiology, Nutrition, and Metabolism       | No  | NA          |
| 1971 | M Harkey, M McLeod, A Van Scoit, M Terada, M Tevald, P Gribble, B Pietrosimone.                     | The immediate effects of an anterior-to-posterior talar mobilization on neural excitability, dorsiflexion range of motion, and dynamic balance in patients with chronic ankle instability. | Journal of Sport Rehabilitation                     | No  | NA          |
| 1974 | T Stellingwerff, JP Godin, CJ Chou, D Grathwohl, AB Ross, KA Cooper, G Williamson, L Actis-Goretta. | The effect of acute dark chocolate consumption on carbohydrate metabolism and performance during rest and exercise.                                                                        | Applied Physiology, Nutrition, and Metabolism       | No  | NA          |
| 1975 | TH Schreuder, TM Eijsvogels, A Greyling, R Draijer, MT Hopman, DH Thijssen.                         | Effect of black tea consumption on brachial artery flow-mediated dilation and ischaemia-reperfusion in humans.                                                                             | Applied Physiology, Nutrition, and Metabolism       | Yes | NCT01660516 |
| 1976 | CE Donges, R Duffield, GC Smith, MJ Short, JA Edge.                                                 | Cytokine mRNA expression responses to resistance, aerobic, and concurrent exercise in sedentary middle-aged men.                                                                           | Applied Physiology, Nutrition, and Metabolism       | No  | NA          |
| 1983 | S Damude, JE Hoekstra-Weebers, AB Francken, S Ter Meulen, E Bastiaannet, HJ Hoekstra.               | The MELFO-Study: Prospective, Randomized, Clinical Trial for the Evaluation of a Stage-adjusted Reduced Follow-up Schedule in Cutaneous Melanoma Patients-Results after 1 Year.            | Annals of Surgical Oncology                         | Yes | NCT01018004 |
| 1995 | JL Stevenson, MK Miller, HE Skillman, CM Paton, JA Cooper.                                          | A PUFA-rich diet improves fat oxidation following saturated fat-rich meal.                                                                                                                 | European Journal of Nutrition                       | Yes | NCT02246933 |

|      |                                                                                                                              |                                                                                                                                                                             |                                                          |     |                |
|------|------------------------------------------------------------------------------------------------------------------------------|-----------------------------------------------------------------------------------------------------------------------------------------------------------------------------|----------------------------------------------------------|-----|----------------|
| 2002 | TL Schumacher, TL Burrows, DI Thompson, NJ Spratt, R Callister, CE Collins.                                                  | Feasibility of Recruiting Families into a Heart Disease Prevention Program Based on Dietary Patterns.                                                                       | Nutrients                                                | No  | NA             |
| 2006 | R Valenzuela, K Bascuñán, R Chamorro, C Barrera, J Sandoval, C Puigredon, G Parraguez, P Orellana, V Gonzalez, A Valenzuela. | Modification of Docosahexaenoic Acid Composition of Milk from Nursing Women Who Received Alpha Linolenic Acid from Chia Oil during Gestation and Nursing.                   | Nutrients                                                | No  | NA             |
| 2009 | K Valdes, N Naughton, CJ Burke.                                                                                              | Therapist-supervised hand therapy versus home therapy with therapist instruction following distal radius fracture.                                                          | Journal of Hand Surgery                                  | No  | NA             |
| 2012 | DM IJff, D Postulart, DA Lambrechts, MH Majoie, RJ de Kinderen, JG Hendriksen, SM Evers, AP Aldenkamp.                       | Cognitive and behavioral impact of the ketogenic diet in children and adolescents with refractory epilepsy: A randomized controlled trial.                                  | Epilepsy and Behavior                                    | Yes | NTR2498        |
| 2022 | AM Santaliestra-Pasías, M Garcia-Lacarte, MC Rico, CM Aguilera, LA Moreno.                                                   | Effect of two bakery products on short-term food intake and gut-hormones in young adults: a pilot study.                                                                    | International Journal of Food Sciences and Nutrition     | No  | NA             |
| 2025 | H Ichida, H Imamura, J Yoshimoto, H Sugo, Y Ishizaki, S Kawasaki.                                                            | Randomized Controlled Trial for Evaluation of the Routine Use of Nasogastric Tube Decompression After Elective Liver Surgery.                                               | Journal of Gastrointestinal Surgery                      | No  | NA             |
| 2029 | HI Han, HS Choi, WS Shin.                                                                                                    | Effects of hamstring stretch with pelvic control on pain and work ability in standing workers.                                                                              | Journal of Back and Musculoskeletal Rehabilitation       | No  | NA             |
| 2036 | RK Elnaggar, MA Elshafey.                                                                                                    | Effects of Combined Resistive Underwater Exercises and Interferential Current Therapy in Patients with Juvenile Idiopathic Arthritis: A Randomized Controlled Trial.        | American Journal of Physical Medicine and Rehabilitation | No  | NA             |
| 2042 | H Mori, H Kobara, N Nishiyama, S Fujihara, T Matsunaga, M Ayaki, T Chiyo, T Masaki.                                          | Simple and reliable treatment for post-EMR artificial ulcer floor with snare cauterization for 10- to 20-mm colorectal polyps: a randomized prospective study (with video). | Surgical Endoscopy                                       | Yes | UMIN 000013473 |
| 2058 | YG Jeong, JW Koo.                                                                                                            | The effects of treadmill walking combined with obstacle-crossing on walking ability in ambulatory patients after stroke: a pilot randomized controlled trial.               | Topics in Stroke Rehabilitation                          | Yes | KCT0001080     |
| 2070 | A El Nakeeb, H Ezzet, W Askar, E El Hanafy, E Hamdy, E Atef, M Youssef, H Talaat, H Hamed, T Abdallah.                       | Early Versus Late Cholecystectomy After Clearance of Common Bile Duct Stones by Endoscopic Retrograde Cholangiopancreatography: A Prospective Randomized Study.             | Surgical Laparoscopy Endoscopy and                       | Yes | NCT02460315    |

|      |                                                                                     |                                                                                                                                                                                                      | Percutaneous Techniques                  |     |                     |
|------|-------------------------------------------------------------------------------------|------------------------------------------------------------------------------------------------------------------------------------------------------------------------------------------------------|------------------------------------------|-----|---------------------|
| 2082 | EJ Tomayko, RJ Prince, KA Cronin, AK Adams.                                         | The Healthy Children, Strong Families intervention promotes improvements in nutrition, activity and body weight in American Indian families with young children.                                     | Public Health Nutrition                  | No  | NA                  |
| 2108 | WS Tan, MH Chew, KS Ho, JB Yatim, JS Lai, CL Tang.                                  | Short and long-term outcomes of a randomised controlled trial of vertical periumbilical wound versus transverse left iliac fossa wound for specimen retrieval in laparoscopic anterior resections.   | Surgical Endoscopy                       | No  | NA                  |
| 2114 | HJ Kan, RW Selles, CA van Nieuwenhoven, C Zhou, RK Khouri, SE Hovius.               | Percutaneous Aponeurotomy and Lipofilling (PALF) versus Limited Fasciectomy in Patients with Primary Dupuytren's Contracture: A Prospective, Randomized, Controlled Trial.                           | Plastic and Reconstructive Surgery       | Yes | NTR1692             |
| 2115 | L Fan, Q Liu, L Gui.                                                                | Efficacy of Non-swallow Nasogastric Tube Intubation: a Randomized Controlled Trial.                                                                                                                  | Journal of Clinical Nursing              | No  | NA                  |
| 2124 | T Paolucci, F Zangrando, M Iosa, S De Angelis, C Marzoli, G Piccinini, VM Saraceni. | Improved interoceptive awareness in chronic low back pain: a comparison of Back school versus Feldenkrais method.                                                                                    | Disability and Rehabilitation            | Yes | NCT02231554         |
| 2134 | U Rosas, S Ahmed, N Leva, T Garg, H Rivas, J Lau, M Russo, JM Morton.               | Mesenteric defect closure in laparoscopic Roux-en-Y gastric bypass: a randomized controlled trial.                                                                                                   | Surgical Endoscopy                       | No  | NA                  |
| 2136 | PY Poh, D Gagnon, SA Romero, VA Convertino, B Adams-Huet, CG Crandall.              | Hemodynamic Stability to Surface Warming and Cooling During Sustained and Continuous Simulated Hemorrhage in Humans.                                                                                 | SHOCK                                    | No  | NA                  |
| 2138 | A Genoni, P Lyons-Wall, J Lo, A Devine.                                             | Cardiovascular, Metabolic Effects and Dietary Composition of Ad-Libitum Paleolithic vs. Australian Guide to Healthy Eating Diets: A 4-Week Randomised Trial.                                         | Nutrients                                | Yes | ACTRN12615000246583 |
| 2139 | AA Petrilli, SJ Souza, AM Teixeira, PM Pontilho, JM Souza, LA Luzia, PH Rondó.      | Effect of Chocolate and Yerba Mate Phenolic Compounds on Inflammatory and Oxidative Biomarkers in HIV/AIDS Individuals.                                                                              | Nutrients                                | Yes | NTR3176             |
| 2142 | WT Chien, AL Yip, JY Liu, TW McMaster.                                              | The effectiveness of manual-guided, problem-solving-based self-learning programme for family caregivers of people with recent-onset psychosis: A randomised controlled trial with 6-month follow-up. | International Journal of Nursing Studies | Yes | NCT02391649         |
| 2157 | D Sharma, K Yadav, P Hazrah, S Borgharia, R Lal, S Thomas.                          | Prospective randomized trial comparing laparoscopic transabdominal preperitoneal (TAPP) and laparoscopic totally extra peritoneal (TEP) approach for bilateral inguinal hernias.                     | International Journal of Surgery         | Yes | CTRI/2015/01/005377 |

|      |                                                                                                                                                                                                                          |                                                                                                                                                                                     |                                                              |     |                   |
|------|--------------------------------------------------------------------------------------------------------------------------------------------------------------------------------------------------------------------------|-------------------------------------------------------------------------------------------------------------------------------------------------------------------------------------|--------------------------------------------------------------|-----|-------------------|
| 2163 | R Tabrizi, S Hosseinpour, F Taghizadeh.                                                                                                                                                                                  | Feeding in Oral Cancer Patients After Massive Ablative Surgery: Percutaneous Endoscopic Gastrostomy or Nasogastric Tube.                                                            | Journal of Craniofacial Surgery                              | No  | NA                |
| 2168 | M Ozkose, H Baykan, İ Coşkuner.                                                                                                                                                                                          | The Effect of Patient Positioning on Amount of Intraoperative Bleeding in Rhinoplasty: A Randomized Controlled Trial.                                                               | Aesthetic Plastic Surgery                                    | No  | NA                |
| 2170 | CL Rock, SW Flatt, B Pakiz, HS Barkai, DD Heath, KC Krumhar.                                                                                                                                                             | Randomized clinical trial of portion-controlled prepackaged foods to promote weight loss.                                                                                           | Obesity                                                      | Yes | NCT02136290       |
| 2190 | AK Swisher, J Abraham, D Bonner, D Gilleland, G Hobbs, S Kurian, MA Yanosik, L Vona-Davis.                                                                                                                               | Exercise and dietary advice intervention for survivors of triple-negative breast cancer: effects on body fat, physical function, quality of life, and adipokine profile.            | Supportive Care in Cancer                                    | Yes | NCT01498536       |
| 2193 | AC Kelly, JC Carter.                                                                                                                                                                                                     | Self-compassion training for binge eating disorder: a pilot randomized controlled trial.                                                                                            | Psychology and Psychotherapy: Theory, Research, and Practice | No  | NA                |
| 2200 | TD Metikaridis, A Hadjipavlou, A Artemiadis, G Chrousos, C Darviri.                                                                                                                                                      | Effect of a stress management program on subjects with neck pain: A pilot randomized controlled trial.                                                                              | Journal of Back and Musculoskeletal Rehabilitation           | No  | NA                |
| 2209 | JP Klein, T Berger, J Schröder, C Späth, B Meyer, F Caspar, W Lutz, A Arndt, W Greiner, V Gräfe, M Hautzinger, K Fuhr, M Rose, S Nolte, B Löwe, G Anderssoni, E Vettorazzi, S Moritz, F Hohagen.                         | Effects of a Psychological Internet Intervention in the Treatment of Mild to Moderate Depressive Symptoms: Results of the EVIDENT Study, a Randomized Controlled Trial.             | Psychotherapy and Psychosomatics                             | Yes | NCT01636752       |
| 2210 | N Yoshinaga, S Matsuki, T Niitsu, Y Sato, M Tanaka, H Ibuki, R Takanashi, K Ohshiro, F Ohshima, K Asano, O Kobori, K Yoshimura, Y Hirano, K Sawaguchi, M Koshizaka, H Hanaoka, A Nakagawa, M Nakazato, M Iyo, E Shimizu. | Cognitive Behavioral Therapy for Patients with Social Anxiety Disorder Who Remain Symptomatic following Antidepressant Treatment: A Randomized, Assessor-Blinded, Controlled Trial. | Psychotherapy and Psychosomatics                             | Yes | UMIN00000755<br>2 |
| 2211 | JH Jeong, HR Na, SH Choi, J Kim, DL Na, SW Seo, J Chin, SA Park, EJ Kim, HJ Han, SH Han, SJ Yoon, JH Lee, KW Park, SY Moon, MH Park, MS Choi, IW Han, JH Lee, JS Lee, YS Shim, JY Kim.                                   | Group- and Home-Based Cognitive Intervention for Patients with Mild Cognitive Impairment: A Randomized Controlled Trial.                                                            | Psychotherapy and Psychosomatics                             | Yes | NCT01358955       |
| 2218 | KJ Coleman, SL Caparosa, JF Nichols, K Fujioka, C Koebnick, KN McCloskey, AH Xiang, EW Ngor, SS Levy.                                                                                                                    | Understanding the Capacity for Exercise in Post-Bariatric Patients.                                                                                                                 | Obesity Surgery                                              | No  | NA                |

|      |                                                                                                                                         |                                                                                                                                                                                 |                                                                     |     |                      |
|------|-----------------------------------------------------------------------------------------------------------------------------------------|---------------------------------------------------------------------------------------------------------------------------------------------------------------------------------|---------------------------------------------------------------------|-----|----------------------|
| 2226 | MH Suominen, TM Puranen, SK Jyväkörpi, U Eloniemi-Sulkava, H Kautiainen, U Siljamäki-Ojansuu, KH Pitkalä.                               | Nutritional Guidance Improves Nutrient Intake and Quality of Life, and May Prevent Falls in Aged Persons with Alzheimer Disease Living with a Spouse (NuAD Trial).              | Journal of Nutrition, Health, and Aging                             | Yes | ACTRN 12611000018910 |
| 2232 | I Yamana, S Takeno, T Hashimoto, K Maki, R Shibata, H Shiwaku, H Shimaoka, E Shiota, Y Yamashita.                                       | Randomized Controlled Study to Evaluate the Efficacy of a Preoperative Respiratory Rehabilitation Program to Prevent Postoperative Pulmonary Complications after Esophagectomy. | Digestive Surgery                                                   | Yes | UMIN000006216        |
| 2234 | SL McClurkin, CD Smith.                                                                                                                 | The Duration of Self-Selected Music Needed to Reduce Preoperative Anxiety.                                                                                                      | Journal of PeriAnesthesia Nursing                                   | No  | NA                   |
| 2243 | WM Moussa, W Khedr.                                                                                                                     | Decompressive craniectomy and expansive duraplasty with evacuation of hypertensive intracerebral hematoma, a randomized controlled trial.                                       | Neurosurgical Review                                                | No  | NA                   |
| 2247 | R Jacob, B Lamarche, V Provencher, C Laramée, P Valois, C Goulet, V Drapeau.                                                            | Evaluation of a Theory-Based Intervention Aimed at Improving Coaches' Recommendations on Sports Nutrition to Their Athletes.                                                    | Journal of the Academy of Nutrition and Dietetics                   | No  | NA                   |
| 2248 | BH Marcus, SJ Hartman, BA Larsen, D Pekmezi, SI Dunsiger, S Linke, B Marquez, KM Gans, BC Bock, AS Mendoza-Vasconez, ML Noble, C Rojas. | Pasos Hacia La Salud: a randomized controlled trial of an internet-delivered physical activity intervention for Latinas.                                                        | International Journal of Behavioral Nutrition and Physical Activity | Yes | NCT01834287          |
| 2257 | Z Yang, Z Yu, Y Jiang, Y Bai, K Miller-Kovach, W Zhao, GD Foster, C Chen.                                                               | Evaluation of a community-based behavioral weight loss program in Chinese adults: A randomized controlled trial.                                                                | Obesity                                                             | Yes | ChiCTR-TRC-13003902  |
| 2264 | J Lorentzen, H Kirk, H Fernandez-Lago, R Frisk, N Scharff Nielsen, M Jorsal, JB Nielsen.                                                | Treadmill training with an incline reduces ankle joint stiffness and improves active range of movement during gait in adults with cerebral palsy.                               | Disability and Rehabilitation                                       | Yes | ISRCTN15203895       |
| 2272 | GS Birdee, RL Rothman, SJ Sohl, D Wertenbaker, A Wheeler, C Bossart, O Balasire, TA Ikizler.                                            | Feasibility and Safety of Intradialysis Yoga and Education in Maintenance Hemodialysis Patients.                                                                                | Journal of Renal Nutrition                                          | No  | NA                   |
| 2274 | MG Barcellona, MC Morrissey, P Milligan, M Clinton, AA Amis.                                                                            | The effect of knee extensor open kinetic chain resistance training in the ACL-injured knee.                                                                                     | Knee Surgery, Sports Traumatology, Arthroscopy                      | No  | NA                   |



|      |                                                                                      |                                                                                                                                                                                                                                                   |                                                  |     |                     |
|------|--------------------------------------------------------------------------------------|---------------------------------------------------------------------------------------------------------------------------------------------------------------------------------------------------------------------------------------------------|--------------------------------------------------|-----|---------------------|
| 2277 | J Xu, S Dong, H Zhou, M Somar, K Lv, Z Li.                                           | The Supine Position Technique Method Is Better Than the Conventional Method for Manual Reduction of Acute Nontraumatic Temporomandibular Joint Dislocation.                                                                                       | Journal of Craniofacial Surgery                  | No  | NA                  |
| 2279 | R Nouchi, Y Taki, H Takeuchi, T Nozawa, A Sekiguchi, R Kawashima.                    | Reading Aloud and Solving Simple Arithmetic Calculation Intervention (Learning Therapy) Improves Inhibition, Verbal Episodic Memory, Focus Attention and Processing Speed in Healthy Elderly People: Evidence from a Randomized Controlled Trial. | Frontiers in Human Neuroscience                  | Yes | UMIN00006998        |
| 2283 | S Park, AE Davis.                                                                    | Effectiveness of direct and non-direct auditory stimulation on coma arousal after traumatic brain injury.                                                                                                                                         | International Journal of Nursing Practice        | No  | NA                  |
| 2286 | EG Rybakov, DY Pikunov, OY Fomenko, SV Chernyshov, YA Shelygin.                      | Side-to-end vs. straight stapled colorectal anastomosis after low anterior resection: results of randomized clinical trial.                                                                                                                       | International Journal of Colorectal Disease      | No  | NA                  |
| 2288 | KA Danks, R Pohlig, DS Reisman.                                                      | Combining fast walking training and a step activity monitoring program to improve daily walking activity after stroke: a preliminary study.                                                                                                       | Archives of Physical Medicine and Rehabilitation | No  | NA                  |
| 2295 | S Backhaus, S Ibarra, D Parrott, J Malec.                                            | Comparison of a Cognitive-Behavioral Coping Skills Group to a Peer Support Group in a Brain Injury Population.                                                                                                                                    | Archives of Physical Medicine and Rehabilitation | No  | NA                  |
| 2297 | C English, GN Healy, T Olds, G Parfitt, E Borkoles, A Coates, S Kramer, J Bernhardt. | Reducing Sitting Time After Stroke: A Phase II Safety and Feasibility Randomized Controlled Trial.                                                                                                                                                | Archives of Physical Medicine and Rehabilitation | Yes | ACTRN12612000958886 |
| 2300 | A Peolsson, M Landén Ludvigsson, AM Tigerfors, G Peterson.                           | Effects of Neck-Specific Exercises Compared to Waiting List for Individuals With Chronic Whiplash-Associated Disorders: A Prospective, Randomized Controlled Study.                                                                               | Archives of Physical Medicine and Rehabilitation | Yes | NCT01547624         |
| 2301 | LE Trexler, DR Parrott, JF Malec.                                                    | Replication of a Prospective Randomized Controlled Trial of Resource Facilitation to Improve Return to Work and School After Brain Injury.                                                                                                        | Archives of Physical Medicine and Rehabilitation | No  | NA                  |
| 2329 | M Monticone, E Ambrosini, B Rocca, D Cazzaniga, V Liquori, A Pedrocchi, H Vernon.    | Group-based multimodal exercises integrated with cognitive-behavioural therapy improve disability, pain and quality of life of subjects with chronic neck pain: A randomized controlled trial with one-year follow-up.                            | Clinical Rehabilitation                          | Yes | ISRCTN14581536      |

|      |                                                                                                                                           |                                                                                                                                                                                |                                                    |     |                     |
|------|-------------------------------------------------------------------------------------------------------------------------------------------|--------------------------------------------------------------------------------------------------------------------------------------------------------------------------------|----------------------------------------------------|-----|---------------------|
| 2344 | R Caccialanza, G Palladini, E Cereda, C Bonardi, P Milani, B Cameletti, L Quarleri, S Cappello, A Foli, F Lavatelli, C Klersy, G Merlini. | Nutritional counseling improves quality of life and preserves body weight in systemic immunoglobulin light-chain (AL) amyloidosis.                                             | Nutrition                                          | Yes | NCT02055534         |
| 2345 | D Emery, A Pearson, R Lopez, C Hamilton, NM Albert.                                                                                       | Voiceover Interactive PowerPoint Catheter Care Education for Home Parenteral Nutrition.                                                                                        | Nutrition in Clinical Practice                     | No  | NA                  |
| 2357 | KC Maki, KL Kaspar, C Khoo, LH Derrig, AL Schild, K Gupta.                                                                                | Consumption of a cranberry juice beverage lowered the number of clinical urinary tract infection episodes in women with a recent history of urinary tract infection.           | American Journal of Clinical Nutrition             | Yes | NCT01776021         |
| 2370 | D Kumar, K McDermott, H Feng, V Goldman, A Luke, RB Souza, FM Hecht.                                                                      | Effects of Form-Focused Training on Running Biomechanics: A Pilot Randomized Trial in Untrained Individuals.                                                                   | Physical Medicine and Rehabilitation               | Yes | NCT01587183         |
| 2375 | PJ Arciero, SJ Ives, C Norton, D Escudero, O Minicucci, G O'Brien, M Paul, MJ Ormsbee, V Miller, C Sheridan, F He.                        | Protein-Pacing and Multi-Component Exercise Training Improves Physical Performance Outcomes in Exercise-Trained Women: The PRISE 3 Study.                                      | Nutrients                                          | Yes | NCT02593656         |
| 2382 | U Vannachavee, A Seeherunwong, P Yuttatri, S Chulakadabba.                                                                                | The Effect of a Drug Adherence Enhancement Program on the Drug Adherence Behaviors of Patients With Major Depressive Disorder in Thailand: A Randomized Clinical Trial.        | Archives of Psychiatric Nursing                    | No  | NA                  |
| 2397 | TT Huang, CB Liu, YH Tsai, YF Chin, CH Wong.                                                                                              | Physical fitness exercise versus cognitive behavior therapy on reducing the depressive symptoms among community-dwelling elderly adults: A randomized controlled trial.        | International Journal of Nursing Studies           | No  | NA                  |
| 2403 | M Donaghy, E Harrison, S O'Brian, R Menzies, M Onslow, A Packman, M Jones.                                                                | An investigation of the role of parental request for self-correction of stuttering in the Lidcombe Program.                                                                    | International Journal of Speech-Language Pathology | Yes | ACTRN12613001247763 |
| 2405 | S Worah, D McNaughton, J Light, E Benedek-Wood.                                                                                           | A comparison of two approaches for representing AAC vocabulary for young children.                                                                                             | International Journal of Speech-Language Pathology | No  | NA                  |
| 2407 | M Ghavipour, G Sotoudeh, M Ghorbani.                                                                                                      | Tomato juice consumption improves blood antioxidative biomarkers in overweight and obese females.                                                                              | Clinical Nutrition                                 | Yes | IRCT2014051017628N1 |
| 2413 | BB Kim, JH Lee, HJ Jeong, HS Cynn.                                                                                                        | Effects of suboccipital release with craniocervical flexion exercise on craniocervical alignment and extrinsic cervical muscle activity in subjects with forward head posture. | Journal of Electromyography and Kinesiology        | No  | NA                  |

|      |                                                                                                                   |                                                                                                                                                                       |                                               |     |               |
|------|-------------------------------------------------------------------------------------------------------------------|-----------------------------------------------------------------------------------------------------------------------------------------------------------------------|-----------------------------------------------|-----|---------------|
| 2418 | MC Valenza, J Rodríguez-Torres, I Cabrera-Martos, A Díaz-Pelegrina, ME Aguilar-Ferrándiz, Y Castellote-Caballero. | Results of a Pilates exercise program in patients with chronic non-specific low back pain: A randomized controlled trial.                                             | Clinical Rehabilitation                       | No  | NA            |
| 2425 | TY Wu, C Lin.                                                                                                     | Developing and evaluating an individually tailored intervention to increase mammography adherence among Chinese American women.                                       | Cancer Nursing                                | No  | NA            |
| 2426 | AS Brazeau, V Gingras, C Leroux, C Suppère, H Mircescu, K Desjardins, P Briand, JM Ekoé, R Rabasa-Lhoret.         | A pilot program for physical exercise promotion in adults with type 1 diabetes: the PEP-1 program.                                                                    | Applied Physiology, Nutrition, and Metabolism | No  | NA            |
| 2429 | SP Raj, TN Antonini, KS Oberjohn, A Cassedy, KL Makoroff, SL Wade.                                                | Web-Based Parenting Skills Program for Pediatric Traumatic Brain Injury Reduces Psychological Distress Among Lower-Income Parents.                                    | Journal of Head Trauma Rehabilitation         | Yes | NCT01056146   |
| 2452 | Y Fujino, K Amimoto, K Fukata, S Ishihara, S Makita, H Takahashi.                                                 | Does training sitting balance on a platform tilted 10° to the weak side improve trunk control in the acute phase after stroke? A randomized, controlled trial.        | Topics in Stroke Rehabilitation               | Yes | UMIN000015948 |
| 2454 | M Kılınc, F Avcu, O Onursal, E Ayvat, C Savcun Demirci, S Aksu Yildirim.                                          | The effects of Bobath-based trunk exercises on trunk control, functional capacity, balance, and gait: a pilot randomized controlled trial.                            | Topics in Stroke Rehabilitation               | No  | NA            |
| 2456 | JT Monroe, IE Lofgren, BL Sartini, GW Greene.                                                                     | The Green Eating Project: web-based intervention to promote environmentally conscious eating behaviours in US university students.                                    | Public Health Nutrition                       | No  | NA            |
| 2458 | LT Toscano, RL Tavares, LT Toscano, CS Silva, AE Almeida, AC Biasoto, Mda C Gonçalves, AS Silva.                  | Potential ergogenic activity of grape juice in runners.                                                                                                               | Applied Physiology, Nutrition, and Metabolism | No  | NA            |
| 2460 | R Koli, K Köhler, E Tonteri, J Peltonen, H Tikkanen, M Fogelholm.                                                 | Dark chocolate and reduced snack consumption in mildly hypertensive adults: an intervention study.                                                                    | Nutrition Journal                             | Yes | NCT02130141   |
| 2466 | LE Burke, LJ Ewing, L Ye, M Styn, Y Zheng, E Music, I Loar, J Mancino, CC Imes, L Hu, R Goode, SM Sereika.        | The SELF trial: A self-efficacy-based behavioral intervention trial for weight loss maintenance.                                                                      | Obesity                                       | Yes | NCT00896194   |
| 2467 | MS Sahin, F Kasapoglu, UL Demir, OA Ozmen, H Coskun, O Basut.                                                     | Comparison of Clinical Results in Nasal Tip Augmentation Either Via Face to Face or Back to Back Technique With Autogenous Auricular Conchal Cartilage.               | Journal of Craniofacial Surgery               | No  | NA            |
| 2469 | CA Raposo-Amaral, R Denadai, DZ Chammas, FF Marques, AS Pinho, WM Roberto, CL Buzzo, CE Raposo-Amaral.            | Cleft Patient-Reported Postoperative Donor Site Pain Following Alveolar Autologous Iliac Crest Bone Grafting: Comparing Two Minimally Invasive Harvesting Techniques. | Journal of Craniofacial Surgery               | No  | NA            |

|      |                                                                                                                                                          |                                                                                                                                                                                              |                                                    |     |                          |
|------|----------------------------------------------------------------------------------------------------------------------------------------------------------|----------------------------------------------------------------------------------------------------------------------------------------------------------------------------------------------|----------------------------------------------------|-----|--------------------------|
| 2472 | LP Svetkey, BC Batch, PH Lin, SS Intille, L Corsino, CC Tyson, HB Bosworth, SC Grambow, C Voils, C Loria, JA Gallis, J Schwager, GG Bennett, GB Bennett. | Cell phone intervention for you (CITY): A randomized, controlled trial of behavioral weight loss intervention for young adults using mobile technology.                                      | Obesity                                            | Yes | NCT01092364              |
| 2475 | JM Mcqueen, TE Howe, C Ballinger, J Godwin.                                                                                                              | Effectiveness of Alcohol Brief Intervention in a General Hospital: A Randomized Controlled Trial.                                                                                            | Journal of Studies on Alcohol and Drugs            | Yes | NCT00982306              |
| 2510 | C Medina-Perez, F de Souza-Teixeira, R Fernandez-Gonzalo, JA Hernandez-Murua, J Antonio de Paz-Fernandez.                                                | Effects of high-speed power training on muscle strength and power in patients with multiple sclerosis.                                                                                       | Journal of Rehabilitation Research and Development | No  | NA                       |
| 2513 | MK O'Connor, L Mueller, E Kwon, CE Drebing, AA O'Connor, A Semiatin, S Wang, R Daley.                                                                    | Enhanced vocational rehabilitation for Veterans with mild traumatic brain injury and mental illness: Pilot study.                                                                            | Journal of Rehabilitation Research and Development | No  | NA                       |
| 2515 | K Georgakouli, A Mpesios, D Kouretas, K Petrotos, C Mitsagga, I Giavasis, AZ Jamurtas.                                                                   | The Effects of an Olive Fruit Polyphenol-Enriched Yogurt on Body Composition, Blood Redox Status, Physiological and Metabolic Parameters and Yogurt Microflora.                              | Nutrients                                          | Yes | NCT02494739              |
| 2520 | E Baque, L Barber, L Sakzewski, RN Boyd.                                                                                                                 | Randomized controlled trial of web-based multimodal therapy for children with acquired brain injury to improve gross motor capacity and performance.                                         | Clinical Rehabilitation                            | Yes | ANZCTR<br>12613000403730 |
| 2522 | SJ Chang, EY Kwak, BJ Hahm, SH Seo, da W Lee, SJ Jang.                                                                                                   | Effects of a Meditation Program on Nurses' Power and Quality of Life.                                                                                                                        | Nursing Science Quarterly                          | No  | NA                       |
| 2523 | A Öztürk, Y Akalın, N Çevik, A Otuzbir, Y Özkan, Y Dostabakan.                                                                                           | Posterior cruciate-substituting total knee replacement recovers the flexion arc faster in the early postoperative period in knees with high varus deformity: a prospective randomized study. | Archives of Orthopaedic and Trauma Surgery         | No  | NA                       |
| 2527 | T Nickel, K Lackermair, J Scherr, A Calatzis, M Vogeser, H Hanssen, G Waidhauser, U Schönemark, H Methe, S Horster, U Wilbert-Lampen, M Halle.           | Influence of High Polyphenol Beverage on Stress-Induced Platelet Activation.                                                                                                                 | Journal of Nutrition, Health, and Aging            | No  | NA                       |
| 2528 | C Taniguchi, C Sato.                                                                                                                                     | Home-based walking during pregnancy affects mood and birth outcomes among sedentary women: A randomized controlled trial.                                                                    | International Journal of Nursing Practice          | No  | NA                       |
| 2529 | D Delev, B Wabbels, J Schramm, M Nelles, CE Elger, M von Lehe, H Clusmann, A Grote.                                                                      | Vision after trans-sylvian or temporobasal selective amygdalohippocampectomy: a prospective randomised trial.                                                                                | Acta Neurochirurgica                               | Yes | ISRCTN436516<br>33       |

|      |                                                                                                                                   |                                                                                                                                                                                                          |                                                 |     |             |
|------|-----------------------------------------------------------------------------------------------------------------------------------|----------------------------------------------------------------------------------------------------------------------------------------------------------------------------------------------------------|-------------------------------------------------|-----|-------------|
| 2534 | HM Forsmo, F Pfeffer, A Rasdal, G Østgaard, AC Mohn, H Körner, C Erichsen.                                                        | Compliance with enhanced recovery after surgery criteria and preoperative and postoperative counselling reduces length of hospital stay in colorectal surgery: results of a randomized controlled trial. | Colorectal Disease                              | Yes | NCT01610726 |
| 2539 | T Sano, M Sasako, J Mizusawa, S Yamamoto, H Katai, T Yoshikawa, A Nashimoto, S Ito, M Kaji, H Imamura, N Fukushima, K Fujitani, . | Randomized Controlled Trial to Evaluate Splenectomy in Total Gastrectomy for Proximal Gastric Carcinoma.                                                                                                 | Annals of Surgery                               | Yes | NCT00112099 |
| 2544 | CJ Armitage, MA Arden.                                                                                                            | Enhancing the Effectiveness of Alcohol Warning Labels With a Self-Affirming Implementation Intention.                                                                                                    | Health Psychology                               | No  | NA          |
| 2557 | NR Geiker, C Ritz, SD Pedersen, TM Larsen, JO Hill, A Astrup.                                                                     | A weight-loss program adapted to the menstrual cycle increases weight loss in healthy, overweight, premenopausal women: a 6-mo randomized controlled trial.                                              | American Journal of Clinical Nutrition          | Yes | NCT01622114 |
| 2570 | HJ Lee, JY Jeong, CK Kim, YS Kim.                                                                                                 | Surgical treatment of lesions of the long head of the biceps brachii tendon with rotator cuff tear: a prospective randomized clinical trial comparing the clinical results of tenotomy and tenodesis.    | Journal of Shoulder and Elbow Surgery           | No  | NA          |
| 2574 | TH Lee, JH Lee, SW Chay, KS Jang, HJ Kim.                                                                                         | Comparison of clinical and radiologic outcomes between non-operative and operative treatment in 5th metatarsal base fractures (Zone 1).                                                                  | Injury                                          | No  | NA          |
| 2576 | D Cameron, T Craig, B Edwards, C Missiuna, H Schwellnus, HJ Polatajko.                                                            | Cognitive Orientation to daily Occupational Performance (CO-OP): A New Approach for Children with Cerebral Palsy.                                                                                        | Physical and Occupational Therapy In Pediatrics | Yes | NCT00430131 |
| 2579 | JL Mensinger, RM Calogero, S Stranges, TL Tylka.                                                                                  | A weight-neutral versus weight-loss approach for health promotion in women with high BMI: A randomized-controlled trial.                                                                                 | Appetite                                        | Yes | NCT00769717 |
| 2580 | MS Lee, JK Thompson.                                                                                                              | Exploring enhanced menu labels' influence on fast food selections and exercise-related attitudes, perceptions, and intentions.                                                                           | Appetite                                        | No  | NA          |
| 2583 | N Goyal, AF Chen, SE Padgett, TL Tan, MM Kheir, RH Hopper, WG Hamilton, WJ Hozack.                                                | Otto Aufranc Award: A Multicenter, Randomized Study of Outpatient versus Inpatient Total Hip Arthroplasty.                                                                                               | Clinical Orthopaedics and Related Research      | Yes | NCT02230657 |
| 2592 | R Carnevale, L Loffredo, M Del Ben, F Angelico, C Nocella, A Petruccioli, S Bartimoccia, R Monticolo, E Cava, F Violi.            | Extra virgin olive oil improves post-prandial glycemic and lipid profile in patients with impaired fasting glucose.                                                                                      | Clinical Nutrition                              | No  | NA          |

|      |                                                                                                                                                                                                                                                                                                                                                                                                 |                                                                                                                                                                                                                               |                                        |     |                     |
|------|-------------------------------------------------------------------------------------------------------------------------------------------------------------------------------------------------------------------------------------------------------------------------------------------------------------------------------------------------------------------------------------------------|-------------------------------------------------------------------------------------------------------------------------------------------------------------------------------------------------------------------------------|----------------------------------------|-----|---------------------|
| 2602 | J Chen, X Li, Y Xiong, KP Fennie, H Wang, AB Williams.                                                                                                                                                                                                                                                                                                                                          | Reducing the risk of HIV transmission among men who have sex with men: A feasibility study of the motivational interviewing counseling method.                                                                                | Nursing and Health Sciences            | No  | NA                  |
| 2607 | J Luttikhold, K van Norren, H Rijna, N Buijs, M Ankersmit, AC Heijboer, J Gootjes, B Hartmann, JJ Holst, LJ van Loon, PA van Leeuwen.                                                                                                                                                                                                                                                           | Jejunal feeding is followed by a greater rise in plasma cholecystokinin, peptide YY, glucagon-like peptide 1, and glucagon-like peptide 2 concentrations compared with gastric feeding in vivo in humans: a randomized trial. | American Journal of Clinical Nutrition | Yes | NTR2801             |
| 2613 | S Chiu, N Bergeron, PT Williams, GA Bray, B Sutherland, RM Krauss.                                                                                                                                                                                                                                                                                                                              | Comparison of the DASH (Dietary Approaches to Stop Hypertension) diet and a higher-fat DASH diet on blood pressure and lipids and lipoproteins: a randomized controlled trial.                                                | American Journal of Clinical Nutrition | Yes | NCT01404897         |
| 2615 | A Madjd, MA Taylor, N Mousavi, A Delavari, R Malekzadeh, IA Macdonald, HR Farshchi.                                                                                                                                                                                                                                                                                                             | Comparison of the effect of daily consumption of probiotic compared with low-fat conventional yogurt on weight loss in healthy obese women following an energy-restricted diet: a randomized controlled trial.                | American Journal of Clinical Nutrition | Yes | IRCT201402177754N8  |
| 2618 | I Parry, L Painting, A Bagley, J Kawada, F Molitor, S Sen, DG Greenhalgh, TL Palmieri.                                                                                                                                                                                                                                                                                                          | A Pilot Prospective Randomized Control Trial Comparing Exercises Using Videogame Therapy to Standard Physical Therapy: 6 Months Follow-Up.                                                                                    | Journal of Burn Care and Research      | No  | NA                  |
| 2622 | T Keck, UF Wellner, M Bahra, F Klein, O Sick, M Niedergethmann, TJ Wilhelm, SA Farkas, T Börner, C Bruns, A Kleespies, J Kleeff, AL Mihaljevic, W Uhl, A Chromik, V Fendrich, K Heeger, W Padberg, A Hecker, UP Neumann, K Junge, JC Kalff, TR Glowka, J Werner, P Knebel, P Piso, M Mayr, J Izbicki, Y Vashist, P Bronsert, T Bruckner, R Limprecht, MK Diener, I Rossion, I Wegener, UT Hopt. | Pancreatogastrostomy Versus Pancreatojejunostomy for REConstruction After PANCreatoduodenectomy (RECOpanc, DRKS 00000767): Perioperative and Long-term Results of a Multicenter Randomized Controlled Trial.                  | Annals of Surgery                      | Yes | DRKS 00000767       |
| 2623 | S Young, M Khondoker, B Emilsson, JF Sigurdsson, F Philipp-Wiegmann, G Baldursson, H Olafsdottir, G Gudjonsson.                                                                                                                                                                                                                                                                                 | Cognitive-behavioural therapy in medication-treated adults with attention-deficit/hyperactivity disorder and co-morbid psychopathology: a randomized controlled trial using multi-level analysis.                             | Psychological Medicine                 | Yes | ACTRN12611000533998 |
| 2626 | AH Chowdhury, K Murray, CL Hoad, C Costigan, L Marciani, IA Macdonald, TE Bowling, DN Lobo.                                                                                                                                                                                                                                                                                                     | Effects of Bolus and Continuous Nasogastric Feeding on Gastric Emptying, Small Bowel Water Content, Superior Mesenteric Artery Blood Flow, and Plasma Hormone Concentrations in Healthy Adults: A Randomized Crossover Study. | Annals of Surgery                      | Yes | NCT01557673         |

|      |                                                                                                                       |                                                                                                                                                                                                           |                                                         |     |                   |
|------|-----------------------------------------------------------------------------------------------------------------------|-----------------------------------------------------------------------------------------------------------------------------------------------------------------------------------------------------------|---------------------------------------------------------|-----|-------------------|
| 2627 | L Tripkovic, NC Muirhead, KH Hart, GS Frost, JK Lodge.                                                                | The effects of a diet rich in inulin or wheat fibre on markers of cardiovascular disease in overweight male subjects.                                                                                     | Journal of Human Nutrition and Dietetics                | No  | NA                |
| 2643 | HY Yeh, WF Ma, JL Huang, KC Hsueh, LC Chiang.                                                                         | Evaluating the effectiveness of a family empowerment program on family function and pulmonary function of children with asthma: A randomized control trial.                                               | International Journal of Nursing Studies                | No  | NA                |
| 2645 | CH Lin, SL Chiang, MM Heitkemper, YJ Hung, MS Lee, WC Tzeng, LC Chiang.                                               | Effects of telephone-based motivational interviewing in lifestyle modification program on reducing metabolic risks in middle-aged and older women with metabolic syndrome: A randomized controlled trial. | International Journal of Nursing Studies                | No  | NA                |
| 2653 | U Piamjariyakul, M Werkowitch, J Wick, C Russell, JL Vacek, CE Smith.                                                 | Caregiver coaching program effect: Reducing heart failure patient rehospitalizations and improving caregiver outcomes among African Americans.                                                            | Heart and Lung                                          | No  | NA                |
| 2654 | MA Acar, H Kütahya, A Güleç, M Elmadağ, N Karalezli, TC Ogun.                                                         | Triggering of the Digits After Carpal Tunnel Surgery.                                                                                                                                                     | Annals of Plastic Surgery                               | No  | NA                |
| 2657 | T Aboulafia-Brakha, R Ptak.                                                                                           | Effects of group psychotherapy on anger management following acquired brain injury.                                                                                                                       | Brain Injury                                            | No  | NA                |
| 2669 | FM Tabrizi, M Radfar, Z Taei.                                                                                         | Effects of supportive-expressive discussion groups on loneliness, hope and quality of life in breast cancer survivors: a randomized control trial.                                                        | Psycho-Oncology                                         | Yes | IRCT2014031516564 |
| 2677 | K Nelson, ML Mathai, JF Ashton, ON Donkor, T Vasiljevic, R Mamilla, L Stojanovska.                                    | Effects of malted and non-malted whole-grain wheat on metabolic and inflammatory biomarkers in overweight/obese adults: a randomised crossover pilot study.                                               | Food Chemistry                                          | No  | NA                |
| 2683 | G Pérez-Rodríguez, OR Brito-Zurita, E Sistos-Navarro, ZM Benítez-Aréchiga, GL Sarmiento-Salazar, JF Vargas-Lizárraga. | [Telemetric monitoring reduces visits to the emergency room and cost of care in patients with chronic heart failure].                                                                                     | Cirugía y Cirujanos                                     | No  | NA                |
| 2691 | R Villalobos Mori, J Escoll Rufino, F Herrerías González, MC Mias Carballal, A Escartin Arias, JJ Olsina Kissler.     | Prospective, randomized comparative study between single-port laparoscopic appendectomy and conventional laparoscopic appendectomy.                                                                       | Cirugía Española                                        | No  | NA                |
| 2693 | H Zajonc, B Grill, F Simunovic, F Lampert, GB Stark, V Penna.                                                         | [Comparison of the Results of Lundborg's and Sirotakova's Resection-Suspension Arthroplasty for the Treatment of Trapeziometacarpal Joint Osteoarthritis].                                                | Handchirurgie<br>Mikrochirurgie<br>Plastische Chirurgie | No  | NA                |
| 2695 | A Kacaroglu Vicdan, B Gulseven Karabacak.                                                                             | Effect of Treatment Education Based on the Roy Adaptation Model on Adjustment of Hemodialysis Patients.                                                                                                   | Clinical Nurse Specialist                               | No  | NA                |

|      |                                                                                                                                                                                                        |                                                                                                                                                                                 |                                                      |     |                     |
|------|--------------------------------------------------------------------------------------------------------------------------------------------------------------------------------------------------------|---------------------------------------------------------------------------------------------------------------------------------------------------------------------------------|------------------------------------------------------|-----|---------------------|
| 2698 | K Anastasiadis, P Antonitsis, G Kostarellou, A Kleontas, A Deliopoulos, V Grosomanidis, H Argiriadou.                                                                                                  | Minimally invasive extracorporeal circulation improves quality of life after coronary artery bypass grafting.                                                                   | European Journal of Cardio-Thoracic Surgery          | Yes | NCT02000544         |
| 2700 | H Verburg, NM Mathijssen, DD Niesten, JA Verhaar, P Pilot.                                                                                                                                             | Comparison of Mini-Midvastus and Conventional Total Knee Arthroplasty with Clinical and Radiographic Evaluation: A Prospective Randomized Clinical Trial with 5-Year Follow-up. | Journal of Bone and Joint Surgery                    | No  | NA                  |
| 2707 | A Todesca, L Garro, M Penna, J Bejui-Hugues.                                                                                                                                                           | Conventional versus computer-navigated TKA: a prospective randomized study.                                                                                                     | Knee Surgery, Sports Traumatology, Arthroscopy       | No  | NA                  |
| 2709 | KL Rice, MJ Bennett, L Berger, B Jennings, L Eckhardt, N Fabr -LaCoste, D Houghton, G Vidal, T Gropen, E Diggs, E Barry, J St John, S Mathew, A Egger, S Ryan, R Egger, D Galarneau, K Gaines, EW Ely. | A Pilot Randomized Controlled Trial of the Feasibility of a Multicomponent Delirium Prevention Intervention Versus Usual Care in Acute Stroke.                                  | Journal of Cardiovascular Nursing                    | No  | NA                  |
| 2710 | AL Bonnema, DK Altschwager, W Thomas, JL Slavin.                                                                                                                                                       | The effects of the combination of egg and fiber on appetite, glycemic response and food intake in normal weight adults - a randomized, controlled, crossover trial.             | International Journal of Food Sciences and Nutrition | Yes | NCT02272153         |
| 2713 | MH Alhussain, IA Macdonald, MA Taylor.                                                                                                                                                                 | Irregular meal-pattern effects on energy expenditure, metabolism, and appetite regulation: a randomized controlled trial in healthy normal-weight women.                        | American Journal of Clinical Nutrition               | Yes | NCT02052076         |
| 2740 | JR Neto, LM Figueiredo E Castro, F Santos de Oliveira, AM Silva, L Maria Dos Reis, AP Quirino, D Dragosavac, C Kosour.                                                                                 | Comparison between two physiotherapy protocols for patients with chronic kidney disease on dialysis.                                                                            | Journal of Physical Therapy Science                  | No  | NA                  |
| 2741 | SM Nam, WB Kim, CK Yun.                                                                                                                                                                                | Effects of balance training by knee joint motions on muscle activity in adult men with functional ankle instability.                                                            | Journal of Physical Therapy Science                  | No  | NA                  |
| 2746 | DA Sharma, MF Chevidikunnan, FR Khan, RA Gaowgzeh.                                                                                                                                                     | Effectiveness of knowledge of result and knowledge of performance in the learning of a skilled motor activity by healthy young adults.                                          | Journal of Physical Therapy Science                  | No  | NA                  |
| 2756 | MS Hossain, LA Harvey, MA Rahman, JL Bowden, MS Islam, V Taylor, S Muldoon, RD Herbert.                                                                                                                | A pilot randomised trial of community-based care following discharge from hospital with a recent spinal cord injury in Bangladesh.                                              | Clinical Rehabilitation                              | Yes | ACTRN12613001137785 |
| 2758 | B Sevinç,   Karahan, A Okuř, S Ay, N Aksoy, G řimřek.                                                                                                                                                  | Randomized prospective comparison of midline and off-midline closure techniques in pilonidal sinus surgery.                                                                     | Surgery                                              | Yes | NCT02186964         |



|      |                                                                                                                                                                |                                                                                                                                                                               |                                        |     |                |
|------|----------------------------------------------------------------------------------------------------------------------------------------------------------------|-------------------------------------------------------------------------------------------------------------------------------------------------------------------------------|----------------------------------------|-----|----------------|
| 2759 | LM Santiago, DA de Oliveira, LG de Macêdo Ferreira, HY de Brito Pinto, AP Spaniol, LC de Lucena Trigueiro, TS Ribeiro, AV de Sousa, ME Piemonte, AR Lindquist. | Immediate effects of adding mental practice to physical practice on the gait of individuals with Parkinson's disease: Randomized clinical trial.                              | NeuroRehabilitation                    | No  | NA             |
| 2760 | L Cugusi, P Solla, R Serpe, T Carzedda, L Piras, M Oggianu, S Gabba, A Di Blasio, M Bergamin, A Cannas, F Marrosu, G Mercurio.                                 | Effects of a Nordic Walking program on motor and non-motor symptoms, functional performance and body composition in patients with Parkinson's disease.                        | NeuroRehabilitation                    | No  | NA             |
| 2763 | EA Storch, A Salloum, MA King, EA Crawford, R Andel, NM McBride, AB Lewin.                                                                                     | A RANDOMIZED CONTROLLED TRIAL IN COMMUNITY MENTAL HEALTH CENTERS OF COMPUTER-ASSISTED COGNITIVE BEHAVIORAL THERAPY VERSUS TREATMENT AS USUAL FOR CHILDREN WITH ANXIETY.       | Depression and Anxiety                 | Yes | NCT01416805    |
| 2767 | NK Grote, WJ Katon, JE Russo, MJ Lohr, M Curran, E Galvin, K Carson.                                                                                           | COLLABORATIVE CARE FOR PERINATAL DEPRESSION IN SOCIOECONOMICALLY DISADVANTAGED WOMEN: A RANDOMIZED TRIAL.                                                                     | Depression and Anxiety                 | Yes | NCT01045655    |
| 2768 | LA King, J Wilhelm, Y Chen, R Blehm, J Nutt, Z Chen, A Serdar, FB Horak.                                                                                       | Effects of Group, Individual, and Home Exercise in Persons With Parkinson Disease: A Randomized Clinical Trial.                                                               | Journal of Neurologic Physical Therapy | Yes | NCT01361724    |
| 2769 | LA Morland, MA Mackintosh, CS Rosen, E Willis, P Resick, K Chard, BC Frueh.                                                                                    | TELEMEDICINE VERSUS IN-PERSON DELIVERY OF COGNITIVE PROCESSING THERAPY FOR WOMEN WITH POSTTRAUMATIC STRESS DISORDER: A RANDOMIZED NONINFERIORITY TRIAL.                       | Depression and Anxiety                 | Yes | NCT02362477    |
| 2775 | D Conradsson, N Löfgren, H Nero, M Hagströmer, A Ståhle, J Lökk, E Franzén.                                                                                    | The Effects of Highly Challenging Balance Training in Elderly With Parkinson's Disease: A Randomized Controlled Trial.                                                        | Neurorehabilitation and Neural Repair  | Yes | NCT01417598    |
| 2776 | A Mansfield, JS Wong, J Bryce, K Brunton, EL Inness, S Knorr, S Jones, B Taati, WE McIlroy.                                                                    | Use of Accelerometer-Based Feedback of Walking Activity for Appraising Progress With Walking-Related Goals in Inpatient Stroke Rehabilitation: A Randomized Controlled Trial. | Neurorehabilitation and Neural Repair  | Yes | NCT01521234    |
| 2777 | S Tyson, J Wilkinson, N Thomas, R Selles, C McCabe, P Tyrrell, A Vail.                                                                                         | Phase II Pragmatic Randomized Controlled Trial of Patient-Led Therapies (Mirror Therapy and Lower-Limb Exercises) During Inpatient Stroke Rehabilitation.                     | Neurorehabilitation and Neural Repair  | Yes | ISRCTN29533052 |

|      |                                                                                                               |                                                                                                                                                                                         |                                                          |     |                     |
|------|---------------------------------------------------------------------------------------------------------------|-----------------------------------------------------------------------------------------------------------------------------------------------------------------------------------------|----------------------------------------------------------|-----|---------------------|
| 2784 | LR Van Dillen, BJ Norton, SA Sahrman, BA Evanoff, M Harris-Hayes, GW Holtzman, J Earley, I Chou, MJ Strube.   | Efficacy of classification-specific treatment and adherence on outcomes in people with chronic low back pain. A one-year follow-up, prospective, randomized, controlled clinical trial. | Manual Therapy                                           | Yes | NCT00802724         |
| 2793 | CY Kim, JS Lee, HD Kim.                                                                                       | Comparison of the Effect of Lateral and Backward Walking Training on Walking Function in Patients with Poststroke Hemiplegia: A Pilot Randomized Controlled Trial.                      | American Journal of Physical Medicine and Rehabilitation | No  | NA                  |
| 2796 | AK Danielsen, J Park, JE Jansen, D Bock, S Skullman, A Wedin, AC Marinez, E Haglind, E Angenete, J Rosenberg. | Early Closure of a Temporary Ileostomy in Patients With Rectal Cancer: A Multicenter Randomized Controlled Trial.                                                                       | Annals of Surgery                                        | Yes | NCT01287637         |
| 2808 | YP Yang, CJ Wang, JJ Wang.                                                                                    | Effect of Aromatherapy Massage on Agitation and Depressive Mood in Individuals With Dementia.                                                                                           | Journal of Gerontological Nursing                        | Yes | NCT02126059         |
| 2824 | GG Shi, H Wang, L Wang, ZX Zhang, H Wang.                                                                     | Two different gracilis loops in graciloplasty of congenital fecal incontinence: comparison of the therapeutic effects.                                                                  | International Journal of Colorectal Disease              | No  | NA                  |
| 2827 | A Ashworth, K Mitchell, JR Blackwell, A Vanhatalo, AM Jones.                                                  | High-nitrate vegetable diet increases plasma nitrate and nitrite concentrations and reduces blood pressure in healthy women.                                                            | Public Health Nutrition                                  | No  | NA                  |
| 2833 | H Zeng, M Liu, P Wang, J Kang, F Lu, L Pan.                                                                   | The Effects of Acupressure Training on Sleep Quality and Cognitive Function of Older Adults: A 1-Year Randomized Controlled Trial.                                                      | Research in Nursing and Health                           | No  | NA                  |
| 2851 | AM Bruder, N Shields, KJ Dodd, R Hau, NF Taylor.                                                              | A progressive exercise and structured advice program does not improve activity more than structured advice alone following a distal radial fracture: a multi-centre, randomised trial.  | Journal of Physiotherapy                                 | Yes | ACTRN12612000118808 |
| 2861 | CL Christiansen, MJ Bade, BS Davidson, MR Dayton, JE Stevens-Lapsley.                                         | Effects of Weight-Bearing Biofeedback Training on Functional Movement Patterns Following Total Knee Arthroplasty: A Randomized Controlled Trial.                                        | Journal of Orthopaedic and Sports Physical Therapy       | Yes | NCT01333189         |
| 2862 | YS Kim, HJ Lee, SH Bae, H Jin, HS Song.                                                                       | Outcome Comparison Between in Situ Repair Versus Tear Completion Repair for Partial Thickness Rotator Cuff Tears.                                                                       | Arthroscopy                                              | No  | NA                  |
| 2864 | MJ Atkinson, TD Wade.                                                                                         | Mindfulness-based prevention for eating disorders: A school-based cluster randomized controlled study.                                                                                  | International Journal of Eating Disorders                | No  | NA                  |
| 2868 | BC Yates, S Rowland, K Mancuso, KA Kupzyk, JF Norman, S Shurmur, K Tesina.                                    | Reducing cardiovascular risk in spouses of cardiac patients: a randomized controlled trial.                                                                                             | Western Journal of Nursing Research                      | Yes | NCT00926848         |

|      |                                                                                                                  |                                                                                                                                                                                            |                                                    |     |                     |
|------|------------------------------------------------------------------------------------------------------------------|--------------------------------------------------------------------------------------------------------------------------------------------------------------------------------------------|----------------------------------------------------|-----|---------------------|
| 2870 | ZB Akmeşe, NT Oran.                                                                                              | Effects of Progressive Muscle Relaxation Exercises Accompanied by Music on Low Back Pain and Quality of Life During Pregnancy.                                                             | Journal of Midwifery and Women's Health            | No  | NA                  |
| 2872 | FJ González-Álvarez, MC Valenza, I Torres-Sánchez, I Cabrera-Martos, J Rodríguez-Torres, Y Castellote-Caballero. | Effects of diaphragm stretching on posterior chain muscle kinematics and rib cage and abdominal excursion: a randomized controlled trial.                                                  | Brazilian Journal of Physical Therapy              | Yes | NCT01753726         |
| 2873 | A Ushinohama, BP Cunha, LO Costa, AM Barela, PB Freitas.                                                         | Effect of a single session of ear acupuncture on pain intensity and postural control in individuals with chronic low back pain: a randomized controlled trial.                             | Brazilian Journal of Physical Therapy              | Yes | NCT01995279         |
| 2882 | EL Carran, SJ White, AN Reynolds, JJ Haszard, BJ Venn.                                                           | Acute effect of fructose intake from sugar-sweetened beverages on plasma uric acid: a randomised controlled trial.                                                                         | European Journal of Clinical Nutrition             | Yes | ACTRN12615000215527 |
| 2883 | MJ Ormsbee, KA Gorman, EA Miller, DA Baur, LA Eckel, RJ Contreras, LB Panton, MT Spicer.                         | Nighttime feeding likely alters morning metabolism but not exercise performance in female athletes.                                                                                        | Applied Physiology, Nutrition, and Metabolism      | Yes | NCT02160873         |
| 2912 | LE Olsho, JA Klerman, PE Wilde, S Bartlett.                                                                      | Financial incentives increase fruit and vegetable intake among Supplemental Nutrition Assistance Program participants: a randomized controlled trial of the USDA Healthy Incentives Pilot. | American Journal of Clinical Nutrition             | Yes | NCT02651064         |
| 2920 | CH Yan, KY Chiu, FY Ng, PK Chan, CX Fang.                                                                        | Comparison between patient-specific instruments and conventional instruments and computer navigation in total knee arthroplasty: a randomized controlled trial.                            | Knee Surgery, Sports Traumatology, Arthroscopy     | No  | NA                  |
| 2921 | AY Karahan, N Sahin, A Baskent.                                                                                  | Comparison of effectiveness of different exercise programs in treatment of failed back surgery syndrome: A randomized controlled trial.                                                    | Journal of Back and Musculoskeletal Rehabilitation | No  | NA                  |
| 2924 | N Romero-Franco, P Jiménez-Reyes.                                                                                | Effects of Warm-Up and Fatigue on Knee Joint Position Sense and Jump Performance.                                                                                                          | Journal of Motor Behavior                          | No  | NA                  |
| 2925 | B Vahlberg, B Lindmark, L Zetterberg, K Hellström, T Cederholm.                                                  | Body composition and physical function after progressive resistance and balance training among older adults after stroke: an exploratory randomized controlled trial.                      | Disability and Rehabilitation                      | Yes | NCT01161329         |
| 2931 | KM Ribeiro, RV Freitas, LM Ferreira, N Deshpande, RO Guerra.                                                     | Effects of balance Vestibular Rehabilitation Therapy in elderly with Benign Paroxysmal Positional Vertigo: a randomized controlled trial.                                                  | Disability and Rehabilitation                      | Yes | RBR-7jkbyg          |
| 2934 | F Ventura, R Sawatzky, J Öhlén, P Karlsson, I Koinberg.                                                          | Challenges of evaluating a computer-based educational programme for women diagnosed with                                                                                                   | European Journal of Cancer Care                    | No  | NA                  |

|      |                                                                                                            |                                                                                                                                              |                                                         |     |                     |
|------|------------------------------------------------------------------------------------------------------------|----------------------------------------------------------------------------------------------------------------------------------------------|---------------------------------------------------------|-----|---------------------|
|      |                                                                                                            | early-stage breast cancer: a randomised controlled trial.                                                                                    |                                                         |     |                     |
| 2935 | A Zengin Alpozgen, A Razak Ozdincler, H Karanlik, F Yaman Agaoglu, AN Narin.                               | Effectiveness of Pilates-based exercises on upper extremity disorders related with breast cancer treatment.                                  | European Journal of Cancer Care                         | No  | NA                  |
| 2936 | DJ Clayton, M Creese, N Skidmore, DJ Stensel, LJ James.                                                    | No Effect of 24 h severe energy restriction on appetite regulation and ad-libitum energy intake in overweight and obese males.               | International Journal of Obesity                        | Yes | NCT02696772         |
| 2945 | A Younes, S Elzayat.                                                                                       | The role of septoplasty in the management of nasal septum fracture: a randomized quality of life study.                                      | International Journal of Oral and Maxillofacial Surgery | No  | NA                  |
| 2953 | M Castro-Sepulveda, N Johannsen, S Astudillo, C Jorquera, C Álvarez, H Zbinden-Foncea, R Ramírez-Campillo. | Effects of Beer, Non-Alcoholic Beer and Water Consumption before Exercise on Fluid and Electrolyte Homeostasis in Athletes.                  | Nutrients                                               | No  | NA                  |
| 2956 | S Schmidt, W Kleist Welch-Guerra, M Matthes, J Baldauf, U Schminke, HW Schroeder.                          | Endoscopic vs Open Decompression of the Ulnar Nerve in Cubital Tunnel Syndrome: A Prospective Randomized Double-Blind Study.                 | Neurosurgery                                            | No  | NA                  |
| 2960 | D Skrypnik, P Bogdański, E Mądry, J Karolkiewicz, M Ratajczak, J Kryściak, D Pupek-Musialik, J Walkowiak.  | Effects of Endurance and Endurance Strength Training on Body Composition and Physical Capacity in Women with Abdominal Obesity.              | Obesity Facts                                           | No  | NA                  |
| 2963 | CJ Burcal, AY Trier, EA Wikstrom.                                                                          | Balance Training vs. Balance Training with STARS in CAI Patients: A Randomized Controlled Trial.                                             | Journal of Sport Rehabilitation                         | Yes | NCT01790581         |
| 2964 | N Kiss, E Isenring, K Gough, G Wheeler, A Wirth, BA Campbell, M Krishnasamy.                               | Early and Intensive Dietary Counseling in Lung Cancer Patients Receiving (Chemo)Radiotherapy-A Pilot Randomized Controlled Trial.            | Nutrition and Cancer                                    | Yes | ACTRN12612000180819 |
| 2980 | A Ortiz-Rubio, I Cabrera-Martos, J Rodríguez-Torres, W Fajardo-Contreras, A Díaz-Pelegrina, MC Valenza.    | Effects of a home-based upper-limb training program in patients with Multiple Sclerosis: a randomized controlled trial.                      | Archives of Physical Medicine and Rehabilitation        | Yes | NCT02047825         |
| 2999 | A Reyes, T Cruickshank, K Nosaka, M Ziman.                                                                 | Respiratory muscle training on pulmonary and swallowing function in patients with Huntington's disease: a pilot randomised controlled trial. | Clinical Rehabilitation                                 | No  | NA                  |
| 3002 | YR Yang, YH Chen, HC Chang, RC Chan, SH Wei, RY Wang.                                                      | Effects of interactive visual feedback training on post-stroke pusher syndrome: a pilot randomized controlled study.                         | Clinical Rehabilitation                                 | No  | NA                  |
| 3003 | JJ Sosnoff, Y Moon, DA Wajda, ML Finlayson, E McAuley, EW Peterson, S Morrison, RW Motl.                   | Fall risk and incidence reduction in high risk individuals with multiple sclerosis: a pilot randomized control trial.                        | Clinical Rehabilitation                                 | Yes | NCT01956227         |

|      |                                                                                                                                                        |                                                                                                                                                                                     |                                                    |     |                     |
|------|--------------------------------------------------------------------------------------------------------------------------------------------------------|-------------------------------------------------------------------------------------------------------------------------------------------------------------------------------------|----------------------------------------------------|-----|---------------------|
| 3004 | A Kaltsatou, E Kouidi, K Fountoulakis, C Sipka, V Theochari, D Kandyliis, A Deligiannis.                                                               | Effects of exercise training with traditional dancing on functional capacity and quality of life in patients with schizophrenia: a randomized controlled study.                     | Clinical Rehabilitation                            | No  | NA                  |
| 3005 | V Argiana, PT Kanellos, K Makrilakis, I Eleftheriadou, G Tsitsinakis, A Kokkinos, D Perrea, N Tentolouris.                                             | The effect of consumption of low-glycemic-index and low-glycemic-load desserts on anthropometric parameters and inflammatory markers in patients with type 2 diabetes mellitus.     | European Journal of Nutrition                      | No  | NA                  |
| 3008 | A Lahtinen, J Leppilahti, S Harmainen, J Sipilä, R Antikainen, ML Seppänen, R Willig, H Vähänikkilä, J Ristiniemi, P Rissanen, P Jalovaara.            | Geriatric and physically oriented rehabilitation improves the ability of independent living and physical rehabilitation reduces mortality: a randomised comparison of 538 patients. | Clinical Rehabilitation                            | Yes | ISRCTN94467061      |
| 3009 | P Morgan, A Murphy, A Opheim, D Pogrebnoy, S Kravtsov, J McGinley.                                                                                     | The safety and feasibility of an intervention to improve balance dysfunction in ambulant adults with cerebral palsy: a pilot randomized controlled trial.                           | Clinical Rehabilitation                            | Yes | ACTRN12613000166774 |
| 3010 | EE Helminen, SH Sinikallio, AL Valjakka, RH Väisänen-Rouvali, JP Arokoski.                                                                             | Effectiveness of a cognitive-behavioural group intervention for knee osteoarthritis pain: a randomized controlled trial.                                                            | Clinical Rehabilitation                            | Yes | ISRCTN64794760      |
| 3014 | AC McGarvey, GR Hoffman, PG Osmotherly, PE Chiarelli.                                                                                                  | Maximizing shoulder function after accessory nerve injury and neck dissection surgery: A multicenter randomized controlled trial.                                                   | Head and Neck                                      | Yes | ACTRN12611000066987 |
| 3020 | SN Vasdekis, A Roussopoulou, A Lazaris, CN Antonopoulos, K Voumvourakis, C Darviri, G Tsvigoulis.                                                      | Stress Management in Patients Undergoing Carotid Endarterectomy for Carotid Artery Stenosis: A Pilot Randomized Controlled Trial.                                                   | Annals of Vascular Surgery                         | No  | NA                  |
| 3030 | HA Samra, J Dutcher, JM McGrath, M Foster, L Klein, G Djira, J Hansen, D Wallenburg.                                                                   | Effect of Skin-to-Skin Holding on Stress in Mothers of Late-Preterm Infants: A Randomized Controlled Trial.                                                                         | Advances in Neonatal Care                          | No  | NA                  |
| 3032 | YT Wang, W Limroongreungrat, LS Chang, X Ke, LC Tsai, YP Chen, J Lewis.                                                                                | Immediate video feedback on ramp, wheelie, and curb wheelchair skill training for persons with spinal cord injury.                                                                  | Journal of Rehabilitation Research and Development | No  | NA                  |
| 3040 | T Hu, L Yao, K Reynolds, PK Whelton, T Niu, S Li, J He, LA Bazzano.                                                                                    | The Effects of a Low-Carbohydrate Diet vs. a Low-Fat Diet on Novel Cardiovascular Risk Factors: A Randomized Controlled Trial.                                                      | Nutrients                                          | Yes | NCT00609271         |
| 3041 | K Andresen, J Burcharth, S Fonnes, L Hupfeld, JP Rothman, S Deigaard, D Winther, MB Errebo, R Therkildsen, D Hauge, FS Sørensen, J Bjerg, J Rosenberg. | Short-term outcome after Onstep versus Lichtenstein technique for inguinal hernia repair: results from a randomized clinical trial.                                                 | Hernia                                             | Yes | NCT01753219         |
| 3051 | D Mitrovic, M Davidovic, P Erceg, J Marinkovic.                                                                                                        | The effectiveness of supplementary arm and upper body exercises following total hip arthroplasty for                                                                                | Clinical Rehabilitation                            | Yes | ISRCTN73197506      |

|      |                                                                                                                                                                                                                                                                                                                                                                   |                                                                                                                                                                                                               |                                                      |     |             |
|------|-------------------------------------------------------------------------------------------------------------------------------------------------------------------------------------------------------------------------------------------------------------------------------------------------------------------------------------------------------------------|---------------------------------------------------------------------------------------------------------------------------------------------------------------------------------------------------------------|------------------------------------------------------|-----|-------------|
|      |                                                                                                                                                                                                                                                                                                                                                                   | osteoarthritis in the elderly: A randomized controlled trial.                                                                                                                                                 |                                                      |     |             |
| 3052 | N Sousa, R Mendes, A Silva, J Oliveira.                                                                                                                                                                                                                                                                                                                           | Combined exercise is more effective than aerobic exercise in the improvement of fall risk factors: A randomized controlled trial in community-dwelling older men.                                             | Clinical Rehabilitation                              | Yes | NCT01874132 |
| 3053 | C Acarturk, E Konuk, M Cetinkaya, I Senay, M Sijbrandij, B Gulen, P Cuijpers.                                                                                                                                                                                                                                                                                     | The efficacy of eye movement desensitization and reprocessing for post-traumatic stress disorder and depression among Syrian refugees: results of a randomized controlled trial.                              | Psychological Medicine                               | Yes | NCT01847742 |
| 3064 | B Ohlsson, G Darwiche, B Roth, P Höglund.                                                                                                                                                                                                                                                                                                                         | Two meals with different carbohydrate, fat and protein contents render equivalent postprandial plasma levels of calprotectin, cortisol, triglycerides and zonulin.                                            | International Journal of Food Sciences and Nutrition | Yes | NCT02405806 |
| 3079 | AA Abdel-Aziem, HM El-Basatiny.                                                                                                                                                                                                                                                                                                                                   | Effectiveness of backward walking training on walking ability in children with hemiparetic cerebral palsy: A randomized controlled trial.                                                                     | Clinical Rehabilitation                              | No  | NA          |
| 3084 | JN Kuzma, G Cromer, DK Hagman, KL Brey Meyer, CL Roth, KE Foster-Schubert, SE Holte, DS Weigle, M Kratz.                                                                                                                                                                                                                                                          | No differential effect of beverages sweetened with fructose, high-fructose corn syrup, or glucose on systemic or adipose tissue inflammation in normal-weight to obese adults: a randomized controlled trial. | American Journal of Clinical Nutrition               | Yes | NCT01424306 |
| 3085 | KM Livingstone, C Celis-Morales, S Navas-Carretero, R San-Cristobal, AL Macready, R Fallaize, H Forster, C Woolhead, CB O'Donovan, CF Marsaux, S Kolossa, L Tsirigoti, CP Lambrinou, G Moschonis, M Godlewska, A Surwilło, CA Drevon, Y Manios, I Traczyk, ER Gibney, L Brennan, MC Walsh, JA Lovegrove, WH Saris, H Daniel, M Gibney, JA Martinez, JC Mathers, . | Effect of an Internet-based, personalized nutrition randomized trial on dietary changes associated with the Mediterranean diet: the Food4Me Study.                                                            | American Journal of Clinical Nutrition               | Yes | NCT01530139 |
| 3086 | M Amini, A Djazayeri, R Majdzadeh, MH Taghdisi, H Sadrzadeh-Yeganeh, Z Abdollahi, N Hosseinpour-Niazi, M Chamari, M Nourmohammadi.                                                                                                                                                                                                                                | A School-Based Intervention to Reduce Excess Weight in Overweight and Obese Primary School Students.                                                                                                          | Biological Research for Nursing                      | Yes | NCT02082080 |
| 3093 | AE Moncrieff, MM Llabre, JR McCalla, M Gutt, AJ Mendez, MD Gellman, RB Goldberg, N Schneiderman.                                                                                                                                                                                                                                                                  | Effects of a Multicomponent Life-Style Intervention on Weight, Glycemic Control, Depressive Symptoms, and Renal Function in Low-Income, Minority Patients With Type 2 Diabetes: Results of                    | Psychosomatic Medicine                               | Yes | NCT01739205 |

|      |                                                                                                                  |                                                                                                                                                                                             |                                                          |     |             |
|------|------------------------------------------------------------------------------------------------------------------|---------------------------------------------------------------------------------------------------------------------------------------------------------------------------------------------|----------------------------------------------------------|-----|-------------|
|      |                                                                                                                  | the Community Approach to Lifestyle Modification for Diabetes Randomized Controlled Trial.                                                                                                  |                                                          |     |             |
| 3102 | DB Creel, LM Schuh, CA Reed, AR Gomez, LA Hurst, J Stote, BM Cacucci.                                            | A randomized trial comparing two interventions to increase physical activity among patients undergoing bariatric surgery.                                                                   | Obesity                                                  | Yes | NCT01722357 |
| 3106 | L Toxqui, MP Vaquero.                                                                                            | An Intervention with Mineral Water Decreases Cardiometabolic Risk Biomarkers. A Crossover, Randomised, Controlled Trial with Two Mineral Waters in Moderately Hypercholesterolaemic Adults. | Nutrients                                                | Yes | NCT02480816 |
| 3108 | KM Ross, RR Wing.                                                                                                | Impact of newer self-monitoring technology and brief phone-based intervention on weight loss: A randomized pilot study.                                                                     | Obesity                                                  | Yes | NCT01999244 |
| 3110 | JJ Harrison, S Badr, B Hamandi, SJ Kim.                                                                          | Randomized Controlled Trial of a Computer-Based Education Program in the Home for Solid Organ Transplant Recipients: Impact on Medication Knowledge, Satisfaction, and Adherence.           | Transplantation                                          | Yes | NCT01826721 |
| 3114 | SR Emerson, SP Kurti, BS Snyder, K Sitaraman, MD Haub, SK Rosenkranz.                                            | Effects of thirty and sixty minutes of moderate-intensity aerobic exercise on postprandial lipemia and inflammation in overweight men: a randomized cross-over study.                       | Journal of the International Society of Sports Nutrition | No  | NA          |
| 3129 | IV Hagen, A Helland, M Bratlie, KA Brokstad, G Rosenlund, H Sveier, G Mellgren, OA Gudbrandsen.                  | High intake of fatty fish, but not of lean fish, affects serum concentrations of TAG and HDL-cholesterol in healthy, normal-weight adults: a randomised trial.                              | British Journal of Nutrition                             | Yes | NCT02130908 |
| 3141 | JR Lansdaal, T Mouton, DC Wascher, G Demey, S Lustig, P Neyret, E Servien.                                       | Early weight bearing versus delayed weight bearing in medial opening wedge high tibial osteotomy: a randomized controlled trial.                                                            | Knee Surgery, Sports Traumatology, Arthroscopy           | Yes | NCT00799370 |
| 3142 | E Iliopoulos, N Galanis, A Zafeiridis, M Iosifidis, P Papadopoulos, M Potoupnis, N Geladas, IS Vrabas, J Kirkos. | Anatomic single-bundle anterior cruciate ligament reconstruction improves walking economy: hamstrings tendon versus patellar tendon grafts.                                                 | Knee Surgery, Sports Traumatology, Arthroscopy           | No  | NA          |
| 3144 | F Bianco, G Romano, P Tsarkov, G Stanojevic, K Shroyer, S Giuratrabocchetta, R Bergamaschi, .                    | Extralevator with vertical rectus abdominis myocutaneous flap vs. non-extralevator abdominoperineal excision for rectal cancer: the RELAPe randomized controlled trial.                     | Colorectal Disease                                       | Yes | NCT01702116 |
| 3145 | M Fagevik Olsén, G Kjellby Wendt, E Hammerlid, U Smedh.                                                          | Effects of a Training Intervention for Enhancing Recovery after Ivor-Lewis Esophagus Surgery: A Randomized Controlled Trial.                                                                | Scandinavian Journal of Surgery                          | Yes | NCT02335970 |

|      |                                                                                                        |                                                                                                                                                                           |                                                            |     |                      |
|------|--------------------------------------------------------------------------------------------------------|---------------------------------------------------------------------------------------------------------------------------------------------------------------------------|------------------------------------------------------------|-----|----------------------|
| 3147 | EA Richards, N Ogata, CW Cheng.                                                                        | Randomized Controlled Theory-Based, E-Mail-Mediated Walking Intervention: Differences Between Dog Owners and Non-Dog Owners.                                              | Clinical Nursing Research                                  | No  | NA                   |
| 3151 | H Kang, F Wang, J Cao, X Liu, G Ji.                                                                    | A prospective randomized trial evaluating two different tensioning techniques for medial patellofemoral ligament reconstruction.                                          | Knee                                                       | No  | NA                   |
| 3158 | G Cipe, MB Cengiz, UO Idiz, E Yardimci, U Malya, D Firat, M Muslumanoglu.                              | The Effects of Preoperative Endoscopic Tattooing on Distal Surgical Margin and Ileostomy Rates in Laparoscopic Rectal Cancer Surgery: A Prospective Randomized Study.     | Surgical Laparoscopy Endoscopy and Percutaneous Techniques | No  | NA                   |
| 3163 | CH Emilien, R West, JH Hollis.                                                                         | The effect of the macronutrient composition of breakfast on satiety and cognitive function in undergraduate students.                                                     | European Journal of Nutrition                              | No  | NA                   |
| 3180 | I Wald, E Fruchter, K Ginat, E Stolin, D Dagan, PD Bliese, PJ Quartana, ML Sipos, DS Pine, Y Bar-Haim. | Selective prevention of combat-related post-traumatic stress disorder using attention bias modification training: a randomized controlled trial.                          | Psychological Medicine                                     | Yes | NCT01723215          |
| 3183 | NK Sari, S Setiati, A Taher, M Wiwie, S Djauzi, J Pandelaki, JS Purba, M Sadikin.                      | The Role of Autosuggestion in Geriatric Patients' Quality of Life: A Study on Psycho-Neuro-Endocrine-Immunology Pathway.                                                  | Social Neuroscience                                        | Yes | NCT01681056          |
| 3186 | M Kaviani, PD Chilibeck, P Yee, GA Zello.                                                              | The effect of consuming low- versus high-glycemic index meals after exercise on postprandial blood lipid response following a next-day high-fat meal.                     | Nutrition and Diabetes                                     | Yes | NCT02012855          |
| 3193 | SL Ames, IC Wurpts, J Pike, DP MacKinnon, KR Reynolds, AW Stacy.                                       | Self-regulation interventions for the reduction of sugar-sweetened beverages in adolescents.                                                                              | Appetite                                                   | No  | NA                   |
| 3200 | SL Tey, EM Chia, CG Forde.                                                                             | Impact of dose-response calorie reduction or supplementation of a covertly manipulated lunchtime meal on energy compensation.                                             | Physiology and Behavior                                    | Yes | ACTRN1261500 0902594 |
| 3201 | BL Davies, DJ Arpin, M Liu, H Reelfs, KG Volkman, K Healey, R Zabad, MJ Kurz.                          | Two Different Types of High-frequency Physical Therapy Promote Improvements in the Balance and Mobility of Persons with Multiple Sclerosis.                               | Archives of Physical Medicine and Rehabilitation           | Yes | NCT02524483          |
| 3208 | JD Wagganer, CE Robison, TA Ackerman, PG Davis.                                                        | Effects of exercise accumulation on plasma lipids and lipoproteins.                                                                                                       | Applied Physiology, Nutrition, and Metabolism              | No  | NA                   |
| 3213 | ZL Tsivos, R Calam, MR Sanders, A Wittkowski.                                                          | A pilot randomised controlled trial to evaluate the feasibility and acceptability of the Baby Triple P Positive Parenting Programme in mothers with postnatal depression. | Clinical Child Psychology and Psychiatry                   | No  | NA                   |



|      |                                                                                                                |                                                                                                                                                           |                                                          |     |                     |
|------|----------------------------------------------------------------------------------------------------------------|-----------------------------------------------------------------------------------------------------------------------------------------------------------|----------------------------------------------------------|-----|---------------------|
| 3225 | M Ni, JF Signorile, K Mooney, A Balachandran, M Potiaumpai, C Luca, JG Moore, CM Kuenze, M Eltoukhy, AC Perry. | Comparative Effect of Power Training and High-Speed Yoga on Motor Function in Older Patients With Parkinson Disease.                                      | Archives of Physical Medicine and Rehabilitation         | No  | NA                  |
| 3226 | Y Yang, L Yong-Ming, D Pei-jian, L Jia, Z Ying-ze.                                                             | Leg position influences early blood loss and functional recovery following total knee arthroplasty: A randomized study.                                   | International Journal of Surgery                         | Yes | researchregistry561 |
| 3232 | HS de França, PA Branco, DP Guedes Junior, P Gentil, J Steele, CV Teixeira.                                    | The effects of adding single-joint exercises to a multi-joint exercise resistance training program on upper body muscle strength and size in trained men. | Applied Physiology, Nutrition, and Metabolism            | No  | NA                  |
| 3234 | H Gatterer, K Klarod, D Heinrich, P Schlemmer, S Dilitz, M Burtscher.                                          | Effects of a 12-day maximal shuttle-run shock microcycle in hypoxia on soccer specific performance and oxidative stress.                                  | Applied Physiology, Nutrition, and Metabolism            | No  | NA                  |
| 3235 | LJ James, MP Funnell, S Milner.                                                                                | An afternoon snack of berries reduces subsequent energy intake compared to an isoenergetic confectionary snack.                                           | Appetite                                                 | No  | NA                  |
| 3238 | NS Lawrence, J O'Sullivan, D Parslow, M Javaid, RC Adams, CD Chambers, K Kos, F Verbruggen.                    | Training response inhibition to food is associated with weight loss and reduced energy intake.                                                            | Appetite                                                 | No  | NA                  |
| 3240 | B Dilek, S Gulbahar, M Gundogdu, B Ergin, M Manisali, M Ozkan, E Akalin.                                       | Efficacy of Proprioceptive Exercises in Patients with Subacromial Impingement Syndrome: A Single-Blinded Randomized Controlled Study.                     | American Journal of Physical Medicine and Rehabilitation | No  | NA                  |
| 3242 | HJ Yang, KM Chen, MD Chen, HC Wu, WJ Chang, YC Wang, HT Huang.                                                 | Applying the transtheoretical model to promote functional fitness of community older adults participating in elastic band exercises.                      | Journal of Advanced Nursing                              | No  | NA                  |
| 3250 | CJ Mitchell, SY Oikawa, DI Ogborn, NJ Nates, LG MacNeil, M Tarnopolsky, SM Phillips.                           | Daily chocolate milk consumption does not enhance the effect of resistance training in young and old men: a randomized controlled trial.                  | Applied Physiology, Nutrition, and Metabolism            | No  | NA                  |
| 3252 | S Hunschede, D El Khoury, S Antoine-Jonville, C Smith, S Thomas, GH Anderson.                                  | Acute changes in substrate oxidation do not affect short-term food intake in healthy boys and men.                                                        | Applied Physiology, Nutrition, and Metabolism            | Yes | NCT01888991         |
| 3254 | H Kim, YL Kim, SM Lee.                                                                                         | Effects of therapeutic Tai Chi on balance, gait, and quality of life in chronic stroke patients.                                                          | International Journal of Rehabilitation Research         | No  | NA                  |

|      |                                                                                                          |                                                                                                                                                                                                  |                                                          |     |                     |
|------|----------------------------------------------------------------------------------------------------------|--------------------------------------------------------------------------------------------------------------------------------------------------------------------------------------------------|----------------------------------------------------------|-----|---------------------|
| 3276 | P Hernández-Alonso, S Giardina, J Salas-Salvadó, P Arcelin, M Bulló.                                     | Chronic pistachio intake modulates circulating microRNAs related to glucose metabolism and insulin resistance in prediabetic subjects.                                                           | European Journal of Nutrition                            | Yes | NCT01441921         |
| 3279 | MB Bohn, H Sørensen, MK Petersen, K Søballe, M Lind.                                                     | Rotational laxity after anatomical ACL reconstruction measured by 3-D motion analysis: a prospective randomized clinical trial comparing anatomic and nonanatomic ACL reconstruction techniques. | Knee Surgery, Sports Traumatology, Arthroscopy           | No  | NA                  |
| 3290 | JJ Annesi, N Mareno.                                                                                     | Indirect effects of exercise on emotional eating through psychological predictors of weight loss in women.                                                                                       | Appetite                                                 | No  | NA                  |
| 3292 | HA Wijnhoven, BS van der Meij, M Visser.                                                                 | Variety within a cooked meal increases meal energy intake in older women with a poor appetite.                                                                                                   | Appetite                                                 | No  | NA                  |
| 3300 | TM Longland, SY Oikawa, CJ Mitchell, MC Devries, SM Phillips.                                            | Higher compared with lower dietary protein during an energy deficit combined with intense exercise promotes greater lean mass gain and fat mass loss: a randomized trial.                        | American Journal of Clinical Nutrition                   | Yes | NCT01776359         |
| 3306 | EA Chowdhury, JD Richardson, GD Holman, K Tsintzas, D Thompson, JA Betts.                                | The causal role of breakfast in energy balance and health: a randomized controlled trial in obese adults.                                                                                        | American Journal of Clinical Nutrition                   | Yes | ISRCTN31521726      |
| 3307 | DJ Lamport, CL Lawton, N Merat, H Jamson, K Myrissa, D Hofman, HK Chadwick, F Quadt, JD Wightman, L Dye. | Concord grape juice, cognitive function, and driving performance: a 12-wk, placebo-controlled, randomized crossover trial in mothers of preteen children.                                        | American Journal of Clinical Nutrition                   | Yes | NCT01411631         |
| 3310 | JA Barbour, PR Howe, JD Buckley, J Bryan, AM Coates.                                                     | Cerebrovascular and cognitive benefits of high-oleic peanut consumption in healthy overweight middle-aged adults.                                                                                | Nutritional Neuroscience                                 | Yes | ACTRN12612000192886 |
| 3311 | J Chen, W Jin, WS Dong, Y Jin, FL Qiao, YF Zhou, CC Ren.                                                 | Effects of Home-based Telesupervising Rehabilitation on Physical Function for Stroke Survivors with Hemiplegia: A Randomized Controlled Trial.                                                   | American Journal of Physical Medicine and Rehabilitation | Yes | ChiCTR-TRC-14005233 |
| 3312 | US Siqueira, LG Orsini Valente, MT de Mello, VL Szejnfeld, MM Pinheiro.                                  | Effectiveness of Aquatic Exercises in Women With Rheumatoid Arthritis: A Randomized, Controlled, 16-Week Intervention-The HYDRA Trial.                                                           | American Journal of Physical Medicine and Rehabilitation | Yes | NCT01447264         |
| 3313 | HS Choi, WS Shin, DH Bang, SJ Choi.                                                                      | Effects of Game-Based Constraint-Induced Movement Therapy on Balance in Patients with Stroke: A Single-Blind Randomized Controlled Trial.                                                        | American Journal of Physical Medicine and Rehabilitation | No  | NA                  |

|      |                                                                                                            |                                                                                                                                                                   |                                                          |     |             |
|------|------------------------------------------------------------------------------------------------------------|-------------------------------------------------------------------------------------------------------------------------------------------------------------------|----------------------------------------------------------|-----|-------------|
| 3314 | FR Caruso, JC Bonjorno, R Arena, SA Phillips, R Cabiddu, RG Mendes, VM Arakelian, D Bassi, A Borghi-Silva. | Hemodynamic, Autonomic, Ventilatory, and Metabolic Alterations After Resistance Training in Patients With Coronary Artery Disease: A Randomized Controlled Trial. | American Journal of Physical Medicine and Rehabilitation | Yes | RBR-63kf95  |
| 3315 | DJ Pournaras, J Nygren, E Hagström-Toft, P Arner, CW le Roux, A Thorell.                                   | Improved glucose metabolism after gastric bypass: evolution of the paradigm.                                                                                      | Surgery for Obesity and Related Diseases                 | Yes | NCT01708096 |
| 3330 | SJ Kang, EH Kim, KJ Ko.                                                                                    | Effects of aerobic exercise on the resting heart rate, physical fitness, and arterial stiffness of female patients with metabolic syndrome.                       | Journal of Physical Therapy Science                      | No  | NA          |
| 3331 | JI Kang, DK Jeong, H Choi.                                                                                 | Effect of exhalation exercise on trunk muscle activity and Oswestry disability index of patients with chronic low back pain.                                      | Journal of Physical Therapy Science                      | No  | NA          |
| 3333 | HJ Jun, KJ Kim, KW Nam, CH Kim.                                                                            | Effects of breathing exercises on lung capacity and muscle activities of elderly smokers.                                                                         | Journal of Physical Therapy Science                      | No  | NA          |
| 3338 | J LeMoult, J Joormann, K Kircanski, IH Gotlib.                                                             | Attentional bias training in girls at risk for depression.                                                                                                        | Journal of Child Psychology and Psychiatry               | No  | NA          |
| 3340 | HG Cha, TH Kim, MK Kim.                                                                                    | Therapeutic efficacy of walking backward and forward on a slope in normal adults.                                                                                 | Journal of Physical Therapy Science                      | No  | NA          |
| 3341 | DS Oh, SE Park.                                                                                            | The effect of lumbar stabilization exercise on the pulmonary function of stroke patients.                                                                         | Journal of Physical Therapy Science                      | No  | NA          |
| 3342 | SY Cho, HT Roh.                                                                                            | Effects of aerobic exercise intervention on serum cartilage oligomeric matrix protein levels and lymphocyte dna damage in obese elderly females.                  | Journal of Physical Therapy Science                      | No  | NA          |
| 3343 | B Kim, Y Park, Y Seo, S Park, H Cho, H Moon, H Lee, M Kim, J Yu.                                           | Effects of individualized versus group task-oriented circuit training on balance ability and gait endurance in chronic stroke inpatients.                         | Journal of Physical Therapy Science                      | No  | NA          |
| 3344 | JH Lim, WS Cho, SJ Lee, CB Park, JS Park.                                                                  | Effects of mechanical horseback riding velocity on spinal alignment in young adults.                                                                              | Journal of Physical Therapy Science                      | No  | NA          |
| 3345 | HS Lim, YL Kim, SM Lee.                                                                                    | The effects of Pilates exercise training on static and dynamic balance in chronic stroke patients: a randomized controlled trial.                                 | Journal of Physical Therapy Science                      | No  | NA          |
| 3346 | KY Kang, KH Yu.                                                                                            | The effects of eye movement training on gait function in patients with stroke.                                                                                    | Journal of Physical Therapy Science                      | No  | NA          |
| 3347 | A Dalgic, A Is, ME Dinc, S Ulusoy, MÖ Avcısal, M Kulekci.                                                  | The Effects of Nasal Packing and Transseptal Suturing After Septoplasty on Olfactory Function, Patient Comfort, and Mucociliary Clearance.                        | Journal of Craniofacial Surgery                          | No  | NA          |

|      |                                                                               |                                                                                                                                                                    |                                                    |     |                     |
|------|-------------------------------------------------------------------------------|--------------------------------------------------------------------------------------------------------------------------------------------------------------------|----------------------------------------------------|-----|---------------------|
| 3348 | T O'Brien, C Jenkins, E Amella, M Mueller, M Moore, D Hathaway.               | An Internet-Assisted Weight Loss Intervention for Older Overweight and Obese Rural Women: A Feasibility Study.                                                     | CIN: Computers, Informatics, Nursing               | No  | NA                  |
| 3351 | JA Gusenoff, RT Mitchell, K Jeong, DK Wukich, BR Gusenoff.                    | Autologous Fat Grafting for Pedal Fat Pad Atrophy: A Prospective Randomized Clinical Trial.                                                                        | Plastic and Reconstructive Surgery                 | Yes | NCT01796808         |
| 3377 | HM Gavelin, CJ Boraxbekk, T Stenlund, LS Järholm, AS Neely.                   | Effects of a process-based cognitive training intervention for patients with stress-related exhaustion.                                                            | Stress                                             | No  | NA                  |
| 3393 | A Hasanpour-Dehkordi, A Khaledi-Far, B Khaledi-Far, S Salehi-Tali.            | The effect of family training and support on the quality of life and cost of hospital readmissions in congestive heart failure patients in Iran.                   | Applied Nursing Research                           | Yes | IRCT2013012612279N1 |
| 3429 | L Trinh, RC Plotnikoff, RE Rhodes, S North, KS Courneya.                      | Feasibility and preliminary efficacy of adding behavioral counseling to supervised physical activity in kidney cancer survivors: a randomized controlled trial.    | Cancer Nursing                                     | Yes | NCT01571401         |
| 3435 | R Monro, AK Bhardwaj, RK Gupta, S Telles, B Allen, P Little.                  | Disc extrusions and bulges in nonspecific low back pain and sciatica: Exploratory randomised controlled trial comparing yoga therapy and normal medical treatment. | Journal of Back and Musculoskeletal Rehabilitation | No  | NA                  |
| 3447 | PA Monteiro, KY Chen, FS Lira, BT Saraiva, BM Antunes, EZ Campos, IF Freitas. | Concurrent and aerobic exercise training promote similar benefits in body composition and metabolic profiles in obese adolescents.                                 | Lipids in Health and Disease                       | Yes | RBR-4HN597          |
| 3448 | HC Liao, SG Zhong, P Li, WB Chen, C Cheng, YG Wang, PS Wu, C Xiao.            | Effects and mechanism of moderate aerobic exercise on impaired fasting glucose improvement.                                                                        | Lipids in Health and Disease                       | No  | NA                  |
| 3450 | LS Hansen, VE Hjortdal, CJ Jakobsen, J Heiberg, M Maagaard, E Sloth.          | Early, dedicated follow-up and treatment of pleural effusions enhance the recovery rate after open cardiac surgery: results from a randomized, clinical trial.     | European Journal of Cardio-Thoracic Surgery        | Yes | NCT02045641         |
| 3456 | TW An, SL Boone, MI Boyer, RH Gelberman, DA Osei, RP Calfee.                  | Effect of ice on pain after corticosteroid injection in the hand and wrist: a randomized controlled trial.                                                         | Journal of Hand Surgery                            | No  | NA                  |
| 3457 | C Jerosch-Herold, J Houghton, L Miller, L Shepstone.                          | Does sensory relearning improve tactile function after carpal tunnel decompression? A pragmatic, assessor-blinded, randomized clinical trial.                      | Journal of Hand Surgery                            | Yes | ISRCTN60890411      |
| 3459 | K Voon, I Silberstein, A Eranki, M Phillips, FM Wood, DW Edgar.               | Xbox Kinect™ based rehabilitation as a feasible adjunct for minor upper limb burns rehabilitation: A pilot RCT.                                                    | Burns                                              | No  | NA                  |
| 3477 | KS Vasconcelos, JM Dias, MC Araújo, AC Pinheiro, BS Moreira, RC Dias.         | Effects of a progressive resistance exercise program with high-speed component on the physical function                                                            | Brazilian Journal of Physical Therapy              | Yes | RBR-9p5q67          |

|      |                                                                                                              |                                                                                                                                                                                                                         |                                                          |     |                    |
|------|--------------------------------------------------------------------------------------------------------------|-------------------------------------------------------------------------------------------------------------------------------------------------------------------------------------------------------------------------|----------------------------------------------------------|-----|--------------------|
|      |                                                                                                              | of older women with sarcopenic obesity: a randomized controlled trial.                                                                                                                                                  |                                                          |     |                    |
| 3494 | J Yang, C Wang, G Cao, W Yang, S Yu, H Zhai, Y Pan.                                                          | Long-term effects of laparoscopic sleeve gastrectomy versus roux-en-Y gastric bypass for the treatment of Chinese type 2 diabetes mellitus patients with body mass index 28-35 kg/m(2).                                 | BMC Surgery                                              | No  | NA                 |
| 3497 | X Dai, JM Stanilka, CA Rowe, EA Esteves, C Nieves, SJ Spaiser, MC Christman, B Langkamp-Henken, SS Percival. | Consuming Lentinula edodes (Shiitake) Mushrooms Daily Improves Human Immunity: A Randomized Dietary Intervention in Healthy Young Adults.                                                                               | Journal of the American College of Nutrition             | Yes | NCT01398176        |
| 3503 | S Lee, Y Kim, BH Lee.                                                                                        | Effect of Virtual Reality-based Bilateral Upper Extremity Training on Upper Extremity Function after Stroke: A Randomized Controlled Clinical Trial.                                                                    | Occupational Therapy International                       | No  | NA                 |
| 3510 | HJ Powers, M Stephens, J Russell, MH Hill.                                                                   | Fortified breakfast cereal consumed daily for 12 wk leads to a significant improvement in micronutrient intake and micronutrient status in adolescent girls: a randomised controlled trial.                             | Nutrition Journal                                        | Yes | ISRCTN55141306     |
| 3530 | KC Hsu, LF Chen, PH Hsiep.                                                                                   | Effect of music intervention on burn patients' pain and anxiety during dressing changes.                                                                                                                                | Burns                                                    | No  | NA                 |
| 3531 | S Tornås, C Psychol, M Løvstad, AK Solbakk, AK Schanke, J Stubberud.                                         | Goal Management Training combined with external cuing as a means to improve emotional regulation, psychological functioning, and quality of life in patients with acquired brain injury: A randomized controlled trial. | Archives of Physical Medicine and Rehabilitation         | Yes | NCT02692352        |
| 3533 | X Hu, MA Dolansky, Y Su, X Hu, M Qu, L Zhou.                                                                 | Effect of a multidisciplinary supportive program for family caregivers of patients with heart failure on caregiver burden, quality of life, and depression: A randomized controlled study.                              | International Journal of Nursing Studies                 | Yes | ChiCTRTRC-14004972 |
| 3537 | E Pelosin, L Avanzino, R Barella, C Bet, E Magioncalda, C Trompetto, P Ruggeri, M Casaleggio, G Abbruzzese.  | Treadmill training frequency influences walking improvement in subjects with Parkinson's disease: a randomized pilot study.                                                                                             | European Journal of Physical and Rehabilitation Medicine | No  | NA                 |
| 3550 | J D Ard, M Cook, J Rushing, A Frain, K Beavers, G Miller, ME Miller, B Nicklas.                              | Impact on weight and physical function of intensive medical weight loss in older adults with stage II and III obesity.                                                                                                  | Obesity                                                  | No  | NA                 |
| 3559 | JE Borenstein, HU Aronow, LB Bolton, MI Dimalanta, E Chan, K Palmer, X Zhang, B Rosen, GD Braunstein.        | Identification and team-based interprofessional management of hospitalized vulnerable older adults.                                                                                                                     | Nursing Outlook                                          | No  | NA                 |

|      |                                                                                                                                                                 |                                                                                                                                                                                    |                                               |     |                |
|------|-----------------------------------------------------------------------------------------------------------------------------------------------------------------|------------------------------------------------------------------------------------------------------------------------------------------------------------------------------------|-----------------------------------------------|-----|----------------|
| 3564 | R Kapoor, A Ronnenberg, E Puleo, RT Chatterton, JF Dorgan, NP Seeram, SR Sturgeon.                                                                              | Effects of Pomegranate Juice on Hormonal Biomarkers of Breast Cancer Risk.                                                                                                         | Nutrition and Cancer                          | No  | NA             |
| 3566 | H Jonsdottir, OR Amundadottir, G Gudmundsson, BS Halldorsdottir, B Hrafnkelsson, TS Ingadottir, R Jonsdottir, JS Jonsson, ED Sigurjonsdottir, IK Stefansdottir. | Effectiveness of a partnership-based self-management programme for patients with mild and moderate chronic obstructive pulmonary disease: a pragmatic randomized controlled trial. | Journal of Advanced Nursing                   | No  | NA             |
| 3571 | T Fujii, A Nakao, K Murotani, Y Okamura, K Ishigure, T Hatsuno, M Sakai, S Yamada, M Kanda, H Sugimoto, S Nomoto, S Takeda, S Morita, Y Kodera.                 | Influence of Food Intake on the Healing Process of Postoperative Pancreatic Fistula After Pancreatoduodenectomy: A Multi-institutional Randomized Controlled Trial.                | Annals of Surgical Oncology                   | Yes | UMIN000003940  |
| 3577 | MA Schrager, J Hilton, R Gould, VE Kelly.                                                                                                                       | Effects of blueberry supplementation on measures of functional mobility in older adults.                                                                                           | Applied Physiology, Nutrition, and Metabolism | No  | NA             |
| 3578 | DQ Donaldson, M Torkington, IC Anthony, EF Wheelwright, MJ Blyth, BG Jones.                                                                                     | Influence of skin incision position on physiological and biochemical changes in tissue after primary total knee replacement - a prospective randomised controlled trial.           | BMC Surgery                                   | Yes | ISRCTN06592799 |
| 3580 | FA Cunha, AW Midgley, PP Soares, PT Farinatti.                                                                                                                  | Postexercise hypotension after maximal short-term incremental exercise depends on exercise modality.                                                                               | Applied Physiology, Nutrition, and Metabolism | No  | NA             |
| 3582 | C Groussard, M Rouchon-Isnard, C Coutard, F Romain, L Malardé, S Lemoine-Morel, B Martin, B Pereira, N Boisseau.                                                | Beneficial effects of an intradialytic cycling training program in patients with end-stage kidney disease.                                                                         | Applied Physiology, Nutrition, and Metabolism | No  | NA             |
| 3586 | S Allsop, BP Green, CJ Dodd-Reynolds, G Barry, PL Rumbold.                                                                                                      | Comparison of short-term energy intake and appetite responses to active and seated video gaming, in 8-11-year-old boys.                                                            | British Journal of Nutrition                  | No  | NA             |
| 3589 | R Antoni, KL Johnston, AL Collins, MD Robertson.                                                                                                                | Investigation into the acute effects of total and partial energy restriction on postprandial metabolism among overweight/obese participants.                                       | British Journal of Nutrition                  | No  | NA             |
| 3603 | ML Lustria, J Cortese, MA Gerend, K Schmitt, YM Kung, C McLaughlin.                                                                                             | A Model of Tailoring Effects: A Randomized Controlled Trial Examining the Mechanisms of Tailoring in a Web-Based STD Screening Intervention.                                       | Health Psychology                             | No  | NA             |
| 3616 | HI Baek, KC Ha, HM Kim, EK Choi, EO Park, BH Park, HJ Yang, MJ Kim, HJ Kang, SW Chae.                                                                           | Randomized, double-blind, placebo-controlled trial of Ficus carica paste for the management of functional constipation.                                                            | Asia Pacific Journal of Clinical Nutrition    | Yes | NCT02138851    |

|      |                                                                                                        |                                                                                                                                                                                                                  |                                                          |     |                     |
|------|--------------------------------------------------------------------------------------------------------|------------------------------------------------------------------------------------------------------------------------------------------------------------------------------------------------------------------|----------------------------------------------------------|-----|---------------------|
| 3618 | IM Toaldo, FA Cruz, EL da Silva, MT Bordignon-Luiz.                                                    | Acute consumption of organic and conventional tropical grape juices ( <i>Vitis labrusca</i> L.) increases antioxidants in plasma and erythrocytes, but not glucose and uric acid levels, in healthy individuals. | Nutrition Research                                       | No  | NA                  |
| 3621 | AB Andersen, LKh Schmidt, D Faurholt-Jepsen, N Roos, H Friis, K Kongsbak, MA Wahed, SH Thilsted.       | The effect of daily consumption of the small fish <i>Amblypharyngodon mola</i> or added vitamin A on iron status: a randomised controlled trial among Bangladeshi children with marginal vitamin A status.       | Asia Pacific Journal of Clinical Nutrition               | No  | NA                  |
| 3626 | Y Hosokawa, WM Adams, DJ Casa.                                                                         | Comparison of Esophageal, Rectal, and Gastrointestinal Temperatures During Passive Rest After Exercise in The Heat: The Influence of Hydration.                                                                  | Journal of Sport Rehabilitation                          | No  | NA                  |
| 3633 | S Torkzahrani, F Mahmoudikohani, K Saatchi, R Sefidkar, M Banaei.                                      | The effect of acupressure on the initiation of labor: A randomized controlled trial.                                                                                                                             | Women and Birth                                          | Yes | IRCT2015042321904N1 |
| 3635 | DA De Luis, R Aller, O Izaola, E Romero.                                                               | [Not Available].                                                                                                                                                                                                 | Nutrición Hospitalaria                                   | No  | NA                  |
| 3638 | A Rus, F Molina, MM Ramos, MJ Martínez-Ramírez, ML Del Moral.                                          | Extra Virgin Olive Oil Improves Oxidative Stress, Functional Capacity, and Health-Related Psychological Status in Patients With Fibromyalgia: A Preliminary Study.                                               | Biological Research for Nursing                          | No  | NA                  |
| 3643 | C Dunn, O Olabode-Dada, L Whetstone, C Thomas, S Aggarwal, K Nordby, S Thompson, M Johnson, C Allison. | Using synchronous distance education to deliver a weight loss intervention: A randomized trial.                                                                                                                  | Obesity                                                  | No  | NA                  |
| 3644 | SJ Herring, JF Cruice, GG Bennett, MZ Rose, A Davey, GD Foster.                                        | Preventing excessive gestational weight gain among African American women: A randomized clinical trial.                                                                                                          | Obesity                                                  | Yes | NCT01530776         |
| 3647 | NA Ricci, MC Aratani, HH Caovilla, FF Ganança.                                                         | Effects of Vestibular Rehabilitation on Balance Control in Older People with Chronic Dizziness: A Randomized Clinical Trial.                                                                                     | American Journal of Physical Medicine and Rehabilitation | Yes | ACTRN12610000018011 |
| 3653 | M Kohan, M Rezaei-Adaryani, A Najaf-Yarandi, F Hoseini, N Mohammad-Taheri.                             | Effects of expiratory ribcage compression before endotracheal suctioning on arterial blood gases in patients receiving mechanical ventilation.                                                                   | Nursing in Critical Care                                 | No  | NA                  |
| 3655 | YA Akbaba, I Yeldan, N Guney, AR Ozdincler.                                                            | Intensive supervision of rehabilitation programme improves balance and functionality in the short term after bilateral total knee arthroplasty.                                                                  | Knee Surgery, Sports Traumatology, Arthroscopy           | No  | NA                  |

|      |                                                                                                   |                                                                                                                                                        |                                                    |     |                     |
|------|---------------------------------------------------------------------------------------------------|--------------------------------------------------------------------------------------------------------------------------------------------------------|----------------------------------------------------|-----|---------------------|
| 3656 | M Motififard, M Heidari, A Nemati.                                                                | No difference between wound closure in extension or flexion for range of motion following total knee arthroplasty: a randomized clinical trial.        | Knee Surgery, Sports Traumatology, Arthroscopy     | Yes | NCT02067533         |
| 3658 | G Regalado, H Lintula, H Kokki, H Kröger, U Väättäin, M Eskelinen.                                | Six-year outcome after non-surgical versus surgical treatment of acute primary patellar dislocation in adolescents: a prospective randomized trial.    | Knee Surgery, Sports Traumatology, Arthroscopy     | No  | NA                  |
| 3659 | GS Ganesh, D Chhabra, M Pattnaik, P Mohanty, R Patel, K Mrityunjay.                               | Effect of trunk muscles training using a star excursion balance test grid on strength, endurance and disability in persons with chronic low back pain. | Journal of Back and Musculoskeletal Rehabilitation | No  | NA                  |
| 3660 | W Trapp, M Weinberger, S Erk, B Fuchs, M Mueller, B Gallhofer, G Hajak, A Kübler, S Lautenbacher. | A brief intervention utilising visual feedback reduces pain and enhances tactile acuity in CLBP patients.                                              | Journal of Back and Musculoskeletal Rehabilitation | No  | NA                  |
| 3661 | NA Roussel, D Kos, I Demeure, A Heyrman, M De Clerck, E Zinzen, F Struyf, J Nijs.                 | Effect of a multidisciplinary program for the prevention of low back pain in hospital employees: a randomized controlled trial.                        | Journal of Back and Musculoskeletal Rehabilitation | No  | NA                  |
| 3662 | A Beck, UT Andersen, E Leedo, LL Jensen, K Martins, M Quvang, KØ Rask, A Vedelspang, F Rønholt.   | Does adding a dietician to the liaison team after discharge of geriatric patients improve nutritional outcome: a randomised controlled trial.          | Clinical Rehabilitation                            | Yes | NCT01776762         |
| 3663 | NN Swe, S Sendhilnathan, M van Den Berg, C Barr.                                                  | Over ground walking and body weight supported walking improve mobility equally in cerebral palsy: a randomised controlled trial.                       | Clinical Rehabilitation                            | Yes | ACTRN12613001025729 |
| 3664 | JI Cameron, G Naglie, TL Green, MA Gignac, M Bayley, M Huijbregts, FL Silver, A Czerwonka.        | A feasibility and pilot randomized controlled trial of the "Timing it Right Stroke Family Support Program".                                            | Clinical Rehabilitation                            | No  | NA                  |
| 3666 | R Fatemi, M Javid, EM Najafabadi.                                                                 | Effects of William training on lumbosacral muscles function, lumbar curve and pain.                                                                    | Journal of Back and Musculoskeletal Rehabilitation | No  | NA                  |
| 3678 | W Welling, A Benjaminse, A Gokeler, B Otten.                                                      | Enhanced retention of drop vertical jump landing technique: A randomized controlled trial.                                                             | Human Movement Science                             | No  | NA                  |
| 3679 | MS Stock, KD Olinghouse, AS Drusch, JA Mota, JM Hernandez, CC Akalonu, BJ Thompson.               | Evidence of muscular adaptations within four weeks of barbell training in women.                                                                       | Human Movement Science                             | No  | NA                  |
| 3681 | J Haines, SL Rifas-Shiman, D Gross, J McDonald, K Kleinman, MW Gillman.                           | Randomized trial of a prevention intervention that embeds weight-related messages within a general parenting program.                                  | Obesity                                            | Yes | NCT02222766         |



|      |                                                                                                                   |                                                                                                                                                           |                                                 |     |                |
|------|-------------------------------------------------------------------------------------------------------------------|-----------------------------------------------------------------------------------------------------------------------------------------------------------|-------------------------------------------------|-----|----------------|
| 3682 | Y Manios, G Moschonis, C Mavrogianni, E van den Heuvel, CM Singh-Povel, M Kiely, KD Cashman.                      | Reduced-fat Gouda-type cheese enriched with vitamin D3 effectively prevents vitamin D deficiency during winter months in postmenopausal women in Greece.  | European Journal of Nutrition                   | Yes | NCT02543671    |
| 3689 | CD Gardner, LC Offringa, JC Hartle, K Kapphahn, R Cherin.                                                         | Weight loss on low-fat vs. low-carbohydrate diets by insulin resistance status among overweight adults and adults with obesity: A randomized pilot trial. | Obesity                                         | Yes | NCT01661426    |
| 3690 | CJ Boraxbekk, F Hagkvist, P Lindner.                                                                              | Motor and mental training in older people: Transfer, interference, and associated functional neural responses.                                            | Neuropsychologia                                | No  | NA             |
| 3695 | C Schwarzer, T Mücke, KD Wolff, DJ Loeffelbein, A Rau.                                                            | Donor site morbidity and flap perfusion of subfascial and suprafascial radial forearm flaps: A randomized prospective clinical comparison trial.          | Journal of Cranio-Maxillo-Facial Surgery        | No  | NA             |
| 3701 | A O'Sullivan, N Fitzpatrick, O Doyle.                                                                             | Effects of early intervention on dietary intake and its mediating role on cognitive functioning: a randomised controlled trial.                           | Public Health Nutrition                         | Yes | ISRCTN04631728 |
| 3703 | S Tyagi, R Sinha, A Tyagi.                                                                                        | Single incision laparoscopic cholecystectomy: Less scar, less pain.                                                                                       | Journal of Minimal Access Surgery               | No  | NA             |
| 3709 | SR Chen, CL Tseng, SY Kuo, YK Chang.                                                                              | Effects of a Physical Activity Intervention on Autonomic and Executive Functions in Obese Young Adolescents: A Randomized Controlled Trial.               | Health Psychology                               | No  | NA             |
| 3714 | S Lacroix, C Des Rosiers, M Gayda, A Nozza, É Thorin, JC Tardif, A Nigam.                                         | A single Mediterranean meal does not impair postprandial flow-mediated dilatation in healthy men with subclinical metabolic dysregulations.               | Applied Physiology, Nutrition, and Metabolism   | No  | NA             |
| 3715 | SL Hung, YH Lin, HY Yang, CC Kao, HY Tung, LH Wei.                                                                | Pelvic floor muscle exercise for fecal incontinence quality of life after coloanal anastomosis.                                                           | Journal of Clinical Nursing                     | No  | NA             |
| 3719 | C Natrasony, D Teitelbaum.                                                                                        | Watch Me Move: A Program For Parents of Young Children With Gross-Motor Delays.                                                                           | Physical and Occupational Therapy In Pediatrics | No  | NA             |
| 3722 | R Matte, TS Hilário, R Reich, GB Aliti, ER Rabelo-Silva.                                                          | Reducing bed rest time from five to three hours does not increase complications after cardiac catheterization: the THREE CATH Trial.                      | Revista Latino-Americana de Enfermagem          | Yes | NCT01740856    |
| 3725 | M Hassenpflug, U Hinz, O Strobel, J Volpert, P Knebel, MK Diener, C Doerr-Harim, J Werner, T Hackert, MW Büchler. | Teres Ligament Patch Reduces Relevant Morbidity After Distal Pancreatectomy (the DISCOVER Randomized Controlled Trial).                                   | Annals of Surgery                               | Yes | DRKS00000546   |

|      |                                                                                                                                                                                                                                    |                                                                                                                                                                          |                                                    |     |                     |
|------|------------------------------------------------------------------------------------------------------------------------------------------------------------------------------------------------------------------------------------|--------------------------------------------------------------------------------------------------------------------------------------------------------------------------|----------------------------------------------------|-----|---------------------|
| 3730 | ML Yeh, YC Chung.                                                                                                                                                                                                                  | A randomized controlled trial of qigong on fatigue and sleep quality for non-Hodgkin's lymphoma patients undergoing chemotherapy.                                        | European Journal of Oncology Nursing               | No  | NA                  |
| 3732 | Z Kauric-Klein, RM Peters, HN Yarandi.                                                                                                                                                                                             | Self-Efficacy and Blood Pressure Self-Care Behaviors in Patients on Chronic Hemodialysis.                                                                                | Western Journal of Nursing Research                | Yes | NCT01052220         |
| 3744 | SB Chapman, S Aslan, JS Spence, MW Keebler, LF DeFina, N Didehbani, AM Perez, H Lu, M D'Esposito.                                                                                                                                  | Distinct Brain and Behavioral Benefits from Cognitive vs. Physical Training: A Randomized Trial in Aging Adults.                                                         | Frontiers in Human Neuroscience                    | Yes | NCT00977418         |
| 3749 | G Fornieles González, MÁ Rosety Rodríguez, MA Rodríguez Pareja, A Diaz Ordóñez, J Rosety Rodríguez, MT Pery Bohorquez, F Brenes Martin, A Escribano Ocon, M Rosety Rodríguez, FJ Ordóñez Muñoz, R Toro Cebada, I Rosety Rodríguez. | A home-based treadmill training reduced epicardial and abdominal fat in postmenopausal women with metabolic syndrome.                                                    | Nutrición Hospitalaria                             | No  | NA                  |
| 3751 | YJ Chen, J Lee, M Puryear, RK Wong, JM Lake, CL Maydonovitch, L Belle, FJ Moawad.                                                                                                                                                  | A randomized controlled study comparing room air with carbon dioxide for abdominal pain, distention, and recovery time in patients undergoing colonoscopy.               | Gastroenterology Nursing                           | No  | NA                  |
| 3752 | K Javanshir, M Amiri, MA Mohseni Bandpei, CF De las Penas, A Rezasoltani.                                                                                                                                                          | The effect of different exercise programs on cervical flexor muscles dimensions in patients with chronic neck pain.                                                      | Journal of Back and Musculoskeletal Rehabilitation | No  | NA                  |
| 3753 | S Winter.                                                                                                                                                                                                                          | Effectiveness of targeted home-based hip exercises in individuals with non-specific chronic or recurrent low back pain with reduced hip mobility: A randomised trial.    | Journal of Back and Musculoskeletal Rehabilitation | Yes | ACTRN12612001256864 |
| 3759 | CH Li, DP Chen, J Yang.                                                                                                                                                                                                            | Enteral Nutritional Support in Patients with Head Injuries After Craniocerebral Surgery.                                                                                 | Turkish Neurosurgery                               | No  | NA                  |
| 3760 | DD Ebert, M Berking, H Thiart, H Riper, JA Laferton, P Cuijpers, B Sieland, D Lehr.                                                                                                                                                | Restoring depleted resources: Efficacy and mechanisms of change of an internet-based unguided recovery training for better sleep and psychological detachment from work. | Health Psychology                                  | Yes | DRKS00004984        |
| 3761 | W Peng, KA Pfeiffer, B Winn, JH Lin, D Suton.                                                                                                                                                                                      | A pilot randomized, controlled trial of an active video game physical activity intervention.                                                                             | Health Psychology                                  | No  | NA                  |
| 3762 | JL Stapleton, SL Manne, K Darabos, K Greene, AE Ray, AL Turner, EJ Coups.                                                                                                                                                          | Randomized controlled trial of a web-based indoor tanning intervention: Acceptability and preliminary outcomes.                                                          | Health Psychology                                  | No  | NA                  |
| 3765 | SJ Hartman, SI Dunsiger, CR Marinac, BH Marcus, RK Rosen, KM Gans.                                                                                                                                                                 | Internet-based physical activity intervention for women with a family history of breast cancer.                                                                          | Health Psychology                                  | No  | NA                  |

|      |                                                                                                                                                                                                  |                                                                                                                                                                                            |                                                              |     |                    |
|------|--------------------------------------------------------------------------------------------------------------------------------------------------------------------------------------------------|--------------------------------------------------------------------------------------------------------------------------------------------------------------------------------------------|--------------------------------------------------------------|-----|--------------------|
| 3769 | E Kandpal, H Alderman, J Friedman, D Filmer, J Onishi, J Avalos.                                                                                                                                 | A Conditional Cash Transfer Program in the Philippines Reduces Severe Stunting.                                                                                                            | Journal of Nutrition                                         | No  | NA                 |
| 3777 | D Djurica, RR Holt, J Ren, AW Shindel, RM Hackman, CL Keen.                                                                                                                                      | Effects of a dietary strawberry powder on parameters of vascular health in adolescent males.                                                                                               | British Journal of Nutrition                                 | Yes | NCT01705093        |
| 3778 | B Le Coq, V Frering, M Ghunaim, P Campan, A Dabrowski, E Mulliez, E Loridan, F Combemale, F Denimal, F Torres, G Baud, C Thibault, G Dezfoulian, L Arnalsteen, A Duhamel, F Pattou, R Caiazzo, . | Impact of Surgical Technique on Long-term Complication Rate After Laparoscopic Adjustable Gastric Banding (LAGB): Results of a Single-blinded Randomized Controlled trial (ANOSEAN Study). | Annals of Surgery                                            | No  | NA                 |
| 3790 | I Cabrera-Martos, MC Valenza, G Valenza-Demet, A Benitez-Feliponi, C Robles-Vizcaino, A Ruiz-Extremera.                                                                                          | Effects of manual therapy on treatment duration and motor development in infants with severe nonsynostotic plagiocephaly: a randomised controlled pilot study.                             | Child's Nervous System                                       | No  | NA                 |
| 3794 | MA Kalarchian, MD Marcus, AP Courcoulas, C Lutz, Y Cheng, G Sweeny.                                                                                                                              | Structured dietary intervention to facilitate weight loss after bariatric surgery: A randomized, controlled pilot study.                                                                   | Obesity                                                      | No  | NA                 |
| 3797 | ME Mendoza, A Capafons, JR Gralow, KL Syrjala, JM Suárez-Rodríguez, JR Fann, MP Jensen.                                                                                                          | Randomized controlled trial of the Valencia model of waking hypnosis plus CBT for pain, fatigue, and sleep management in patients with cancer and cancer survivors.                        | Psycho-Oncology                                              | No  | NA                 |
| 3802 | N Akkaya, S Akkaya, HR Gungor, G Yaşar, NS Atalay, F Sahin.                                                                                                                                      | Effects of weighted and un-weighted pendulum exercises on ultrasonographic Acromiohumeral distance in patients with subacromial impingement syndrome.                                      | Journal of Back and Musculoskeletal Rehabilitation           | No  | NA                 |
| 3803 | F Ghaderi, MA Jafarabadi, K Javanshir.                                                                                                                                                           | The clinical and EMG assessment of the effects of stabilization exercise on nonspecific chronic neck pain: A randomized controlled trial.                                                  | Journal of Back and Musculoskeletal Rehabilitation           | Yes | IRCT201109137548N1 |
| 3810 | P Pearce, R Sewell, M Cooper, S Osman, AJ Fugard, J Pybis.                                                                                                                                       | Effectiveness of school-based humanistic counselling for psychological distress in young people: Pilot randomized controlled trial with follow-up in an ethnically diverse sample.         | Psychology and Psychotherapy: Theory, Research, and Practice | Yes | ISRCTN44253140     |
| 3812 | AA Juhl, P Karlsson, TE Damsgaard.                                                                                                                                                               | Fat grafting for alleviating persistent pain after breast cancer treatment: A randomized controlled trial.                                                                                 | Journal of Plastic, Reconstructive and Aesthetic Surgery     | Yes | NCT01888419        |
| 3813 | RT Ho, TC Fong, PH Lo, SM Ho, PW Lee, PP Leung, D Spiegel, CL Chan.                                                                                                                              | Randomized controlled trial of supportive-expressive group therapy and body-mind-spirit intervention for Chinese non-metastatic breast cancer patients.                                    | Supportive Care in Cancer                                    | No  | NA                 |

|      |                                                                                                                                                                                                                                                |                                                                                                                                                                                    |                                                    |     |                |
|------|------------------------------------------------------------------------------------------------------------------------------------------------------------------------------------------------------------------------------------------------|------------------------------------------------------------------------------------------------------------------------------------------------------------------------------------|----------------------------------------------------|-----|----------------|
| 3817 | M Watanabe, M Yokotsuka, K Yamaoka, M Adachi, A Nemoto, T Tango.                                                                                                                                                                               | Effects of a lifestyle modification programme to reduce the number of risk factors for metabolic syndrome: a randomised controlled trial.                                          | Public Health Nutrition                            | Yes | UMIN00008560   |
| 3825 | O Cook, G Frost, D Twose, L Wallman, B Falk, V Galea, A Adkin, P Klentrou.                                                                                                                                                                     | CAN-flip: A Pilot Gymnastics Program for Children With Cerebral Palsy.                                                                                                             | Adapted Physical Activity Quarterly                | No  | NA             |
| 3828 | M Giles, S Millar, C Armour, C McClenahan, J Mallett, B Stewart-Knox.                                                                                                                                                                          | Promoting positive attitudes to breastfeeding: the development and evaluation of a theory-based intervention with school children involving a cluster randomised controlled trial. | Maternal and Child Nutrition                       | No  | NA             |
| 3835 | J Sato, A Kanazawa, S Makita, C Hatae, K Komiya, T Shimizu, F Ikeda, Y Tamura, T Ogihara, T Mita, H Goto, T Uchida, T Miyatsuka, K Takeno, S Shimada, C Ohmura, T Watanabe, K Kobayashi, Y Miura, M Iwaoka, N Hirashima, Y Fujitani, H Watada. | A randomized controlled trial of 130 g/day low-carbohydrate diet in type 2 diabetes with poor glycemic control.                                                                    | Clinical Nutrition                                 | Yes | UMIN000010663  |
| 3838 | YL Lin, A Karduna.                                                                                                                                                                                                                             | Exercises focusing on rotator cuff and scapular muscles do not improve shoulder joint position sense in healthy subjects.                                                          | Human Movement Science                             | Yes | NCT02164305    |
| 3839 | T Yamauchi, S Hasegawa, M Nakamura, S Nishishita, K Yanase, K Fujita, J Umehara, X Ji, S Ibuki, N Ichihashi.                                                                                                                                   | Effects of two stretching methods on shoulder range of motion and muscle stiffness in baseball players with posterior shoulder tightness: a randomized controlled trial.           | Journal of Shoulder and Elbow Surgery              | No  | NA             |
| 3843 | SR Yoon, JH Lee, JH Lee, GY Na, KH Lee, YB Lee, GH Jung, OY Kim.                                                                                                                                                                               | Low-FODMAP formula improves diarrhea and nutritional status in hospitalized patients receiving enteral nutrition: a randomized, multicenter, double-blind clinical trial.          | Nutrition Journal                                  | Yes | NCT02353689    |
| 3844 | CL Gentile, E Ward, JJ Holst, A Astrup, MJ Ormsbee, S Connelly, PJ Arciero.                                                                                                                                                                    | Resistant starch and protein intake enhances fat oxidation and feelings of fullness in lean and overweight/obese women.                                                            | Nutrition Journal                                  | Yes | NCT02418429    |
| 3846 | M Sakuma, S Noda, Y Morimoto, A Suzuki, K Nishino, S Ando, M Umeda, M Ishikawa, H Arai.                                                                                                                                                        | Nocturnal eating disturbs phosphorus excretion in young subjects: a randomized crossover trial.                                                                                    | Nutrition Journal                                  | Yes | ISRCTN13160049 |
| 3854 | KT Jackson, CL Dennis.                                                                                                                                                                                                                         | Lanolin for the treatment of nipple pain in breastfeeding women: a randomized controlled trial.                                                                                    | Maternal and Child Nutrition                       | Yes | NCT01420419    |
| 3855 | PE Mintken, AW McDevitt, JA Cleland, RE Boyles, AR Beardslee, SA Burns, MD Haberl, LA Hinrichs, LA Michener.                                                                                                                                   | Cervicothoracic Manual Therapy Plus Exercise Therapy Versus Exercise Therapy Alone in the Management of Individuals With Shoulder Pain: A Multicenter Randomized Controlled Trial. | Journal of Orthopaedic and Sports Physical Therapy | Yes | NCT01571674    |

|      |                                                                                                                                                 |                                                                                                                                                                                                                                          |                                                          |     |             |
|------|-------------------------------------------------------------------------------------------------------------------------------------------------|------------------------------------------------------------------------------------------------------------------------------------------------------------------------------------------------------------------------------------------|----------------------------------------------------------|-----|-------------|
| 3856 | A Santamato, F Panza, A Notarnicola, G Cassatella, F Fortunato, JL De Sanctis, G Valeno, PG Kehoe, D Seripa, G Logroscino, P Fiore, M Ranieri.  | In the Treatment of Subacromial Impingement Syndrome Is Extra Corporeal Shock Wave Therapy Combined With Isokinetic Exercise for Rotator Cuff More Effective Than Extra Corporeal Shock Wave Therapy Alone? A Randomized Clinical Trial. | Journal of Orthopaedic and Sports Physical Therapy       | No  | NA          |
| 3858 | S Seery, P Jakeman.                                                                                                                             | A metered intake of milk following exercise and thermal dehydration restores whole-body net fluid balance better than a carbohydrate-electrolyte solution or water in healthy young men.                                                 | British Journal of Nutrition                             | No  | NA          |
| 3865 | J Bourgeois, M Laye, J Lemaire, E Leone, A Deudon, N Darmon, C Giaume, V Lafont, S Brinck-Jensen, A Dechamps, A König, P Robert.                | Relearning of Activities of Daily Living: A Comparison of the Effectiveness of Three Learning Methods in Patients with Dementia of the Alzheimer Type.                                                                                   | Journal of Nutrition, Health, and Aging                  | Yes | NCT01095718 |
| 3866 | P De Vriendt, W Peersman, A Florus, M Verbeke, D Van de Velde.                                                                                  | Improving Health Related Quality of Life and Independence in Community Dwelling Frail Older Adults through a Client-Centred and Activity-Oriented Program. A Pragmatic Randomized Controlled Trial.                                      | Journal of Nutrition, Health, and Aging                  | No  | NA          |
| 3877 | CC Hendrix, DE Bailey, KE Steinhauer, MK Olsen, KM Stechuchak, SG Lowman, AJ Schwartz, RF Riedel, FJ Keefe, LS Porter, JA Tulsy.                | Effects of enhanced caregiver training program on cancer caregiver's self-efficacy, preparedness, and psychological well-being.                                                                                                          | Supportive Care in Cancer                                | Yes | NCT00938769 |
| 3878 | HY Lin, SC Chen, HL Peng, MK Chen.                                                                                                              | Effects of a case management program on patients with oral precancerous lesions: a randomized controlled trial.                                                                                                                          | Supportive Care in Cancer                                | No  | NA          |
| 3882 | D Hansen, I Wens, C Keytsman, K Verboven, P Dendale, BO Eijnde.                                                                                 | Ventilatory function during exercise in multiple sclerosis and impact of training intervention: cross-sectional and randomized controlled trial.                                                                                         | European Journal of Physical and Rehabilitation Medicine | No  | NA          |
| 3887 | T Paolucci, M Vetrano, F Zangrando, MC Vulpiani, MR Grasso, D Trifoglio, M Di Franco, C Iannuccelli, ML Sorgi, V Reis, VM Saraceni, L Guidetti. | MMPI-2 profiles and illness perception in fibromyalgia syndrome: The role of therapeutic exercise as adapted physical activity.                                                                                                          | Journal of Back and Musculoskeletal Rehabilitation       | No  | NA          |
| 3909 | C Duarte, F Bastidas, A de los Reyes, MC Martínez, G Hurtado, MC Gómez, R Sánchez, J Manrique.                                                  | Randomized controlled clinical trial comparing radioguided occult lesion localization with wire-guided lesion localization to evaluate their efficacy and accuracy in the localization of nonpalpable breast lesions.                    | Surgery                                                  | No  | NA          |

|      |                                                                                                                                                           |                                                                                                                                                                         |                                                                     |     |                     |
|------|-----------------------------------------------------------------------------------------------------------------------------------------------------------|-------------------------------------------------------------------------------------------------------------------------------------------------------------------------|---------------------------------------------------------------------|-----|---------------------|
| 3910 | BA Nguyen, F Fiorentino, BC Reeves, K Baig, T Athanasiou, JR Anderson, DO Haskard, GD Angelini, PC Evans.                                                 | Mini Bypass and Proinflammatory Leukocyte Activation: A Randomized Controlled Trial.                                                                                    | Annals of Thoracic Surgery                                          | Yes | ISRCTN30610605      |
| 3911 | K Mrak, S Uranitsch, F Pedross, A Heuberger, A Klingler, M Jagoditsch, D Weihs, T Eberl, J Tschmelitsch.                                                  | Diverting ileostomy versus no diversion after low anterior resection for rectal cancer: A prospective, randomized, multicenter trial.                                   | Surgery                                                             | Yes | ISRCTN15655996      |
| 3913 | L Xie, X Wang, Z Huang, Y Lu, T Lin.                                                                                                                      | Influence of the Interval Between Renal Computed Tomographic Angiography and Kidney Transplantation on Allograft Function: A Prospective, Randomized, Controlled Trial. | Transplantation Proceedings                                         | Yes | ChiCTR-TRC-11002108 |
| 3914 | R Quek, X Bi, CJ Henry.                                                                                                                                   | Impact of protein-rich meals on glycaemic response of rice.                                                                                                             | British Journal of Nutrition                                        | No  | NA                  |
| 3920 | MJ Silverman.                                                                                                                                             | Effects of Live and Educational Music Therapy on Working Alliance and Trust with Patients on Detoxification Unit: A Four-Group Cluster-Randomized Trial.                | Substance Use and Misuse                                            | No  | NA                  |
| 3925 | MA Alvarez-Gonzalez, JA Flores-Le Roux, A Seoane, J Pedro-Botet, L Carot, A Fernandez-Clotet, A Raga, MA Pantaleon, L Barranco, F Bory, V Lorenzo-Zuñiga. | Efficacy of a multifactorial strategy for bowel preparation in diabetic patients undergoing colonoscopy: a randomized trial.                                            | Endoscopy                                                           | Yes | NCT02300779         |
| 3943 | HY Jung, H Lee, J Park.                                                                                                                                   | Comparison of the effects of Korean mindfulness-based stress reduction, walking, and patient education in diabetes mellitus.                                            | Nursing and Health Sciences                                         | No  | NA                  |
| 3948 | LB Dolan, K Campbell, K Gelmon, S Neil-Sztramko, D Holmes, DC McKenzie.                                                                                   | Interval versus continuous aerobic exercise training in breast cancer survivors--a pilot RCT.                                                                           | Supportive Care in Cancer                                           | No  | NA                  |
| 3950 | H Guo, X Zeng, Q Zhuang, Y Zheng, S Chen.                                                                                                                 | Intervention of childhood and adolescents obesity in Shantou city.                                                                                                      | Obesity Research and Clinical Practice                              | No  | NA                  |
| 3973 | MS Sidhu, A Daley, K Jolly.                                                                                                                               | Evaluation of a text supported weight maintenance programme 'Lighten Up Plus' following a weight reduction programme: randomised controlled trial.                      | International Journal of Behavioral Nutrition and Physical Activity | Yes | ISRCTN47845106      |
| 3975 | DF Dunne, S Jack, RP Jones, L Jones, DT Lythgoe, HZ Malik, GJ Poston, DH Palmer, SW Fenwick.                                                              | Randomized clinical trial of prehabilitation before planned liver resection.                                                                                            | British Journal of Surgery                                          | Yes | NCT01523353         |
| 3981 | GR Cousins, SL Gill, CG Tinning, SM Johnson, PK Rickhuss.                                                                                                 | Arm versus forearm tourniquet for carpal tunnel decompression - Which is better? A randomized controlled trial.                                                         | Journal of Hand Surgery                                             | No  | NA                  |

|      |                                                                                                          |                                                                                                                                                                                                                            |                                                                  |     |                |
|------|----------------------------------------------------------------------------------------------------------|----------------------------------------------------------------------------------------------------------------------------------------------------------------------------------------------------------------------------|------------------------------------------------------------------|-----|----------------|
| 3985 | AJ Cochran, F Myslik, MJ MacInnis, ME Percival, D Bishop, MA Tamopolsky, MJ Gibala.                      | Manipulating Carbohydrate Availability Between Twice-Daily Sessions of High-Intensity Interval Training Over 2 Weeks Improves Time-Trial Performance.                                                                      | International Journal of Sport Nutrition and Exercise Metabolism | No  | NA             |
| 3986 | JL Pryor, EC Johnson, J Del Favero, A Monteleone, LE Armstrong, NR Rodriguez.                            | Hydration Status and Sodium Balance of Endurance Runners Consuming Postexercise Supplements of Varying Nutrient Content.                                                                                                   | International Journal of Sport Nutrition and Exercise Metabolism | No  | NA             |
| 3987 | EE Ziegler, DA Fields, SD Chernausek, P Steenhout, D Grathwohl, JM Jeter, SE Nelson, F Haschke.          | Adequacy of Infant Formula With Protein Content of 1.6 g/100 kcal for Infants Between 3 and 12 Months.                                                                                                                     | Journal of Pediatric Gastroenterology and Nutrition              | Yes | NCT00716105    |
| 3998 | M Schröder, K Müller, M Falkenstein, P Stehle, M Kersting, L Libuda.                                     | Short-term effects of lunch on children's executive cognitive functioning: The randomized crossover Cognition Intervention Study Dortmund PLUS (CogniDo PLUS).                                                             | Physiology and Behavior                                          | Yes | NCT02082444    |
| 4004 | DK Galos, DP Taormina, A Crespo, DY Ding, A Sapienza, S Jain, NC Tejwani.                                | Does Brachial Plexus Blockade Result in Improved Pain Scores After Distal Radius Fracture Fixation? A Randomized Trial.                                                                                                    | Clinical Orthopaedics and Related Research                       | Yes | NCT01968824    |
| 4007 | A Kalron, I Fonkatz, L Frid, H Baransi, A Achiron.                                                       | The effect of balance training on postural control in people with multiple sclerosis using the CAREN virtual reality system: a pilot randomized controlled trial.                                                          | Journal of NeuroEngineering and Rehabilitation                   | Yes | ISRCTN14425615 |
| 4016 | SH Chang, MC Chen, NH Chien, HF Lin.                                                                     | Effectiveness of community-based exercise intervention programme in obese adults with metabolic syndrome.                                                                                                                  | Journal of Clinical Nursing                                      | No  | NA             |
| 4021 | VK Bansal, A Krishna, P Manek, S Kumar, O Prajapati, R Subramaniam, A Kumar, A Kumar, R Sagar, MC Misra. | A prospective randomized comparison of testicular functions, sexual functions and quality of life following laparoscopic totally extra-peritoneal (TEP) and trans-abdominal pre-peritoneal (TAPP) inguinal hernia repairs. | Surgical Endoscopy                                               | No  | NA             |
| 4023 | R Nilsen, AH Pripp, AT Høstmark, A Haug, S Skeie.                                                        | Effect of a cheese rich in angiotensin-converting enzyme-inhibiting peptides (Gamalost®) and a Gouda-type cheese on blood pressure: results of a randomised trial.                                                         | Food and Nutrition Research                                      | Yes | NCT01913756    |
| 4025 | SD Potter, RG Brown, S Fleminger.                                                                        | Randomised, waiting list controlled trial of cognitive-behavioural therapy for persistent postconcussional                                                                                                                 | Journal of Neurology,                                            | Yes | ISRCTN49540320 |

|      |                                                                                                                                                                            |                                                                                                                                                                                         |                                            |     |                     |
|------|----------------------------------------------------------------------------------------------------------------------------------------------------------------------------|-----------------------------------------------------------------------------------------------------------------------------------------------------------------------------------------|--------------------------------------------|-----|---------------------|
|      |                                                                                                                                                                            | symptoms after predominantly mild-moderate traumatic brain injury.                                                                                                                      | Neurosurgery, and Psychiatry               |     |                     |
| 4027 | JM Cholette, MF Swartz, J Rubenstein, KF Henrichs, H Wang, KS Powers, LE Daugherty, GM Alfieris, F Gensini, N Blumberg.                                                    | Outcomes Using a Conservative Versus Liberal Red Blood Cell Transfusion Strategy in Infants Requiring Cardiac Operation.                                                                | Annals of Thoracic Surgery                 | Yes | NCT01484886         |
| 4033 | A Schaller, CM Dintsios, A Icks, N Reibling, I Froboese.                                                                                                                   | Promoting physical activity in low back pain patients: six months follow-up of a randomised controlled trial comparing a multicomponent intervention with a low intensity intervention. | Clinical Rehabilitation                    | Yes | DRKS00004878        |
| 4043 | A Haghghi, V Shafipour, M Bagheri Nesami, A Gholipour Baradari, J Yazdani Charati.                                                                                         | The impact of oral care on oral health status and prevention of ventilator-associated pneumonia in critically ill patients.                                                             | Australian Critical Care                   | Yes | IRCT2015100424342N1 |
| 4049 | SW Chan, JY Lau, SA Reynolds.                                                                                                                                              | Is cognitive bias modification training truly beneficial for adolescents?                                                                                                               | Journal of Child Psychology and Psychiatry | No  | NA                  |
| 4052 | D Pratt, N Tarrier, G Dunn, Y Awenat, J Shaw, F Ulph, P Gooding.                                                                                                           | Cognitive-behavioural suicide prevention for male prisoners: a pilot randomized controlled trial.                                                                                       | Psychological Medicine                     | Yes | ISRCTN59909209      |
| 4055 | M Piredda, V Biagioli, D Giannarelli, D Incletoli, F Grieco, M Carassiti, MG De Marinis.                                                                                   | Improving cancer patients' knowledge about totally implantable access port: a randomized controlled trial.                                                                              | Supportive Care in Cancer                  | No  | NA                  |
| 4059 | BL Quick, NR LaVoie, SE Morgan, D Bosch.                                                                                                                                   | You've got mail! An examination of a statewide direct-mail marketing campaign to promote deceased organ donor registrations.                                                            | Clinical Transplantation                   | No  | NA                  |
| 4061 | V Montoya, ML Sole, AE Norris.                                                                                                                                             | Improving the Care of Patients with Chronic Kidney Disease Using Group Visits: A Pilot Study to Reflect an Emphasis on the Patients Rather Than the Disease.                            | Nephrology Nursing Journal                 | No  | NA                  |
| 4076 | I Elfeddali, H de Vries, C Bolman, T Pronk, RW Wiers.                                                                                                                      | A randomized controlled trial of Web-based Attentional Bias Modification to help smokers quit.                                                                                          | Health Psychology                          | Yes | NTR2312             |
| 4078 | SL Colgan, K Faasse, JA Pereira, A Grey, KJ Petrie.                                                                                                                        | Changing Perceptions and Efficacy of Generic Medicines: An Intervention Study.                                                                                                          | Health Psychology                          | No  | NA                  |
| 4084 | M Price, S Higgs, M Lee.                                                                                                                                                   | Snack intake is reduced using an implicit, high-level construal cue.                                                                                                                    | Health Psychology                          | No  | NA                  |
| 4087 | S van Beugen, M Ferwerda, S Spillekom-van Koulil, JV Smit, ME Zeeuwen-Franssen, EB Kroft, EM de Jong, ME Otero, AR Donders, PC van de Kerkhof, H van Middendorp, AW Evers. | Tailored Therapist-Guided Internet-Based Cognitive Behavioral Treatment for Psoriasis: A Randomized Controlled Trial.                                                                   | Psychotherapy and Psychosomatics           | Yes | NTR2436             |
| 4088 | V Vilchez Barboza, TP Klijn, A Salazar Molina, KL Sáez Carrillo.                                                                                                           | Effectiveness of personalized face-to-face and telephone nursing counseling interventions for cardiovascular risk factors: a controlled clinical trial.                                 | Revista Latino-Americana de Enfermagem     | No  | NA                  |



|      |                                                                                    |                                                                                                                                                        |                                                              |     |               |
|------|------------------------------------------------------------------------------------|--------------------------------------------------------------------------------------------------------------------------------------------------------|--------------------------------------------------------------|-----|---------------|
| 4089 | RR Mafetoni, AK Shimo.                                                             | The effects of acupressure on labor pains during child birth: randomized clinical trial.                                                               | Revista Latino-Americana de Enfermagem                       | Yes | RBR-9mhs8r    |
| 4093 | J Watanabe, M Ota, S Fujii, H Suwa, A Ishibe, I Endo.                              | Randomized clinical trial of single-incision versus multiport laparoscopic colectomy.                                                                  | British Journal of Surgery                                   | Yes | UMIN000007220 |
| 4103 | BP Patel, JK Hamilton, S Vien, SG Thomas, GH Anderson.                             | Pubertal status, pre-meal drink composition, and later meal timing interact in determining children's appetite and food intake.                        | Applied Physiology, Nutrition, and Metabolism                | Yes | NCT01272427   |
| 4108 | H Woldag, N Voigt, M Bley, H Hummelsheim.                                          | Constraint-Induced Aphasia Therapy in the Acute Stage: What Is the Key Factor for Efficacy? A Randomized Controlled Study.                             | Neurorehabilitation and Neural Repair                        | Yes | NCT02804412   |
| 4111 | BR Ballester, M Maier, RM San Segundo Mozo, V Castañeda, A Duff, PF M J Verschure. | Counteracting learned non-use in chronic stroke patients with reinforcement-induced movement therapy.                                                  | Journal of NeuroEngineering and Rehabilitation               | Yes | NCT02657070   |
| 4116 | S Pervane Vural, GF Nakipoglu Yuzer, D Sezgin Ozcan, S Demir Ozbudak, N Ozgirgin.  | Effects of Mirror Therapy in Stroke Patients With Complex Regional Pain Syndrome Type 1: A Randomized Controlled Study.                                | Archives of Physical Medicine and Rehabilitation             | No  | NA            |
| 4120 | AA Abdelaal, MA Mohamad.                                                           | Obesity indices and haemodynamic response to exercise in obese diabetic hypertensive patients: Randomized controlled trial.                            | Obesity Research and Clinical Practice                       | No  | NA            |
| 4124 | K Meng, S Peters, A Schultze, K Pfeifer, H Faller.                                 | [The Impact of 2 Interventions on Implementation Fidelity of a Standardized Back School Program in Inpatient Orthopedic Rehabilitation Facilities].    | Die Rehabilitation                                           | Yes | DRKS00004835  |
| 4125 | C Braunger, N Kubiak, G Müller, J von Wietersheim, J Oster.                        | [Effectiveness of Telephone and Face-to-Face Aftercare Conversations following Inpatient Psychosomatic Rehabilitation].                                | Die Rehabilitation                                           | No  | NA            |
| 4127 | S Helbig-Lang, S Rusch, W Rief, TM Lincoln.                                        | The strategy does not matter: Effects of acceptance, reappraisal, and distraction on the course of anticipatory anxiety in social anxiety disorder.    | Psychology and Psychotherapy: Theory, Research, and Practice | No  | NA            |
| 4131 | LY Liao, WS Chung, KM Chen.                                                        | Free Radicals and Antioxidant Enzymes in Older Adults after Regular Senior Elastic Band Exercising: An Experimental Randomized Controlled Pilot Study. | Journal of Advanced Nursing                                  | No  | NA            |
| 4139 | D Benton, KT Jenkins, HT Watkins, HA Young.                                        | Minor degree of hypohydration adversely influences cognition: a mediator analysis.                                                                     | American Journal of Clinical Nutrition                       | Yes | NCT02671149   |

|      |                                                                                                             |                                                                                                                                                                                 |                                                  |     |                     |
|------|-------------------------------------------------------------------------------------------------------------|---------------------------------------------------------------------------------------------------------------------------------------------------------------------------------|--------------------------------------------------|-----|---------------------|
| 4140 | JA Greenberg, R O'Donnell, M Shurpin, D Kordunova.                                                          | Epicatechin, procyanidins, cocoa, and appetite: a randomized controlled trial.                                                                                                  | American Journal of Clinical Nutrition           | Yes | NCT02408289         |
| 4142 | WL Hall, S Iqbal, H Li, R Gray, SE Berry.                                                                   | Modulation of postprandial lipaemia by a single meal containing a commonly consumed interesterified palmitic acid-rich fat blend compared to a non-interesterified equivalent.  | European Journal of Nutrition                    | Yes | NCT02365987         |
| 4143 | TJ Kelechi, M Mueller, M Madisetti, MA Prentice, MJ Dooley.                                                 | Does cyrotherapy improve skin circulation compared with compression and elevation in preventing venous leg ulcers?                                                              | International Wound Journal                      | Yes | NCT01509599         |
| 4145 | P Van Bogaert, D Tolson, R Eerlingen, D Carvers, K Wouters, K Paque, O Timmermans, T Dilles, S Engelborghs. | SolCos model-based individual reminiscence for older adults with mild to moderate dementia in nursing homes: a randomized controlled intervention study.                        | Journal of Psychiatric and Mental Health Nursing | Yes | ISRCTN74355073      |
| 4148 | A Yamany, B Hamdy.                                                                                          | Effect of sequential pneumatic compression therapy on venous blood velocity, refilling time, pain and quality of life in women with varicose veins: a randomized control study. | Journal of Physical Therapy Science              | No  | NA                  |
| 4149 | D Volpe, MG Giantin, P Manuela, C Filippetto, E Pelosin, G Abbruzzese, A Antonini.                          | Water-based vs. non-water-based physiotherapy for rehabilitation of postural deformities in Parkinson's disease: A randomized controlled pilot study.                           | Clinical Rehabilitation                          | No  | NA                  |
| 4150 | YJ Yang, J Zhang, Y Hou, BY Jiang, HF Pan, J Wang, DY Zhong, HY Guo, Y Zhu, J Cheng.                        | Effectiveness and safety of Chinese massage therapy (Tui Na) on post-stroke spasticity: A prospective multicenter randomized controlled trial.                                  | Clinical Rehabilitation                          | Yes | ChiCTR-IOR-16008321 |
| 4153 | SM Lee, CH Lee, D O'Sullivan, JH Jung, JJ Park.                                                             | Clinical effectiveness of a Pilates treatment for forward head posture.                                                                                                         | Journal of Physical Therapy Science              | No  | NA                  |
| 4156 | SJ Kang, KJ Ko, UH Baek.                                                                                    | Effects of 12 weeks combined aerobic and resistance exercise on heart rate variability in type 2 diabetes mellitus patients.                                                    | Journal of Physical Therapy Science              | No  | NA                  |
| 4158 | HG Cha, MK Kim.                                                                                             | Effects of mental practice on normal adult balance ability.                                                                                                                     | Journal of Physical Therapy Science              | No  | NA                  |
| 4166 | D Shao, W Gao, FL Cao.                                                                                      | Brief Psychological Intervention in Patients With Cervical Cancer: A Randomized Controlled Trial.                                                                               | Health Psychology                                | No  | NA                  |
| 4167 | AK Otto, EC Szczesny, EC Soriano, JP Laurenceau, SD Siegel.                                                 | Effects of a Randomized Gratitude Intervention on Death-Related Fear of Recurrence in Breast Cancer Survivors.                                                                  | Health Psychology                                | No  | NA                  |
| 4169 | N Duruk, I Eşer.                                                                                            | The Null Effect of Chewing Gum During Hemodialysis on Dry Mouth.                                                                                                                | Clinical Nurse Specialist                        | No  | NA                  |

|      |                                                                                                                                                                            |                                                                                                                                                                                       |                                                    |     |                     |
|------|----------------------------------------------------------------------------------------------------------------------------------------------------------------------------|---------------------------------------------------------------------------------------------------------------------------------------------------------------------------------------|----------------------------------------------------|-----|---------------------|
| 4171 | SI Park, MS Kim, JD Choi.                                                                                                                                                  | Effects of concentric and eccentric control exercise on gross motor function and balance ability of paretic leg in children with spastic hemiplegia.                                  | Journal of Physical Therapy Science                | No  | NA                  |
| 4174 | J Zhu, H Hong-Gu, X Zhou, H Wei, Y Gao, B Ye, Z Liu, SW Chan.                                                                                                              | Pain relief effect of breast feeding and music therapy during heel lance for healthy-term neonates in China: a randomized controlled trial.                                           | Midwifery                                          | No  | NA                  |
| 4175 | RS Keast, BA Swinburn, D Sayompark, S Whitelock, LJ Riddell.                                                                                                               | Caffeine increases sugar-sweetened beverage consumption in a free-living population: a randomised controlled trial.                                                                   | British Journal of Nutrition                       | Yes | ACTRN12608000151336 |
| 4183 | JM Shaw, JM Young, PN Butow, T Badgery-Parker, I Durcinoska, JD Harrison, PM Davidson, D Martin, C Sandroussi, M Hollands, D Joseph, A Das, V Lam, E Johnston, MJ Solomon. | Improving psychosocial outcomes for caregivers of people with poor prognosis gastrointestinal cancers: a randomized controlled trial (Family Connect).                                | Supportive Care in Cancer                          | Yes | ACTRN12609000920291 |
| 4187 | BA Morrill, GJ Madden, HJ Wengreen, JD Fargo, SS Aguilar.                                                                                                                  | A Randomized Controlled Trial of the Food Dudes Program: Tangible Rewards are More Effective Than Social Rewards for Increasing Short- and Long-Term Fruit and Vegetable Consumption. | Journal of the Academy of Nutrition and Dietetics  | No  | NA                  |
| 4192 | KM Muscat, HG Kotrach, CA Wilkinson-Maitland, MR Schaeffer, CT Mendonca, D Jensen.                                                                                         | Physiological and perceptual responses to incremental exercise testing in healthy men: effect of exercise test modality.                                                              | Applied Physiology, Nutrition, and Metabolism      | No  | NA                  |
| 4203 | JD Cameron, GS Goldfield, MÈ Riou, GS Finlayson, JE Blundell, É Doucet.                                                                                                    | Energy depletion by diet or aerobic exercise alone: impact of energy deficit modality on appetite parameters.                                                                         | American Journal of Clinical Nutrition             | Yes | NCT02653378         |
| 4219 | E Uygur, E Çarkçi, A Şenel, B Kemah, Y Turhan.                                                                                                                             | A new and simple suturing technique applied after surgery to correct ingrown toenails may improve clinical outcomes: a randomized trial.                                              | International Journal of Surgery                   | No  | NA                  |
| 4227 | MH Jung, B Houston, SD Russell, F Gustafsson.                                                                                                                              | Pump speed modulations and sub-maximal exercise tolerance in left ventricular assist device recipients: A double-blind, randomized trial.                                             | Journal of Heart and Lung Transplantation          | Yes | NCT02335684         |
| 4233 | K Newhall, B Suckow, E Spangler, BS Brooke, A Schanzer, T Tan, M Burnette, MO Edelen, A Farber, P Goodney, .                                                               | Impact and duration of brief surgeon-delivered smoking cessation advice on attitudes regarding nicotine dependence and tobacco harms for patients with peripheral arterial disease.   | Annals of Vascular Surgery                         | Yes | NCT02220686         |
| 4235 | G Charlesworth, K Burnell, N Crellin, Z Hoare, J Hoe, M Knapp, I Russell, J Wenborn, B Woods, M Orrell.                                                                    | Peer support and reminiscence therapy for people with dementia and their family carers: a factorial pragmatic randomised trial.                                                       | Journal of Neurology, Neurosurgery, and Psychiatry | Yes | ISRCTN37956201      |

|      |                                                                                                           |                                                                                                                                                                               |                                             |     |                     |
|------|-----------------------------------------------------------------------------------------------------------|-------------------------------------------------------------------------------------------------------------------------------------------------------------------------------|---------------------------------------------|-----|---------------------|
| 4240 | G Garulli, A Lucchi, P Berti, C Gabbianelli, LM Siani.                                                    | "Ultra" E.R.A.S. in laparoscopic colectomy for cancer: discharge after the first flatus? A prospective, randomized trial.                                                     | Surgical Endoscopy                          | Yes | NCT02727153         |
| 4244 | BL Neumann, A Dunn, D Johnson, JD Adams, JI Baum.                                                         | Breakfast Macronutrient Composition Influences Thermic Effect of Feeding and Fat Oxidation in Young Women Who Habitually Skip Breakfast.                                      | Nutrients                                   | No  | NA                  |
| 4250 | TL Grisbrook, PM Gittings, FM Wood, DW Edgar.                                                             | The effectiveness of session rating of perceived exertion to monitor resistance training load in acute burns patients.                                                        | Burns                                       | Yes | ACTRN12614001156673 |
| 4252 | SK Lee, KJ Kim, YH Cha, WS Choy.                                                                          | Conservative Treatment Is Sufficient for Acute Distal Radioulnar Joint Instability With Distal Radius Fracture.                                                               | Annals of Plastic Surgery                   | No  | NA                  |
| 4257 | J Feng, K Li, L Li, X Wang, M Huang, J Yang, Y Hu.                                                        | The effects of fast-track surgery on inflammation and immunity in patients undergoing colorectal surgery.                                                                     | International Journal of Colorectal Disease | Yes | ChiCTR-TRC-14005013 |
| 4265 | NF Leal, HF Oliveira, HH Carrara.                                                                         | Supervised physical therapy in women treated with radiotherapy for breast cancer.                                                                                             | Revista Latino-Americana de Enfermagem      | Yes | NCT02198118         |
| 4273 | J Turner, B Kelly, D Clarke, P Yates, S Aranda, D Jolley, A Forbes, S Chambers, M Hargraves, L Mackenzie. | A tiered multidisciplinary approach to the psychosocial care of adult cancer patients integrated into routine care: the PROMPT study (a cluster-randomised controlled trial). | Supportive Care in Cancer                   | Yes | ACTRN12610000448044 |
| 4275 | SL Jee, R Jarmin, KF Lim, K Raman.                                                                        | Outcomes of early versus delayed cholecystectomy in patients with mild to moderate acute biliary pancreatitis: A randomized prospective study.                                | Asian Journal of Surgery                    | Yes | NMRR-13-254-14633   |
| 4284 | YJ Lee, ES Kim, JH Choi, KI Lee, KS Park, KB Cho, BK Jang, WJ Chung, JS Hwang.                            | Impact of reinforced education by telephone and short message service on the quality of bowel preparation: a randomized controlled study.                                     | Endoscopy                                   | Yes | NCT01911052         |
| 4285 | S Din, AJ Ball, SA Riley, P Kitsanta, S Johal.                                                            | A randomized comparison of cold snare polypectomy versus a suction pseudopolyp technique.                                                                                     | Endoscopy                                   | Yes | NCT02208401         |
| 4287 | E Clarebrough, G Guest, D Stupart.                                                                        | Eating marshmallows reduces ileostomy output: a randomized crossover trial.                                                                                                   | Colorectal Disease                          | Yes | ACTRN12613000633785 |
| 4288 | J Pool, M Dercher, B Hanson, L Heiman, Y Li, K Schraeder, MP Schultz, S Ziglinski, M Ebberts.             | The Effect of Head of Bed Elevation on Patient Comfort After Angiography.                                                                                                     | Journal of Cardiovascular Nursing           | No  | NA                  |
| 4289 | EW Twamley, KR Thomas, AM Gregory, AJ Jak, MW Bondi, DC Delis, JB Lohr.                                   | CogSMART Compensatory Cognitive Training for Traumatic Brain Injury: Effects Over 1 Year.                                                                                     | Journal of Head Trauma Rehabilitation       | Yes | NCT00704067         |

|      |                                                                                                                                                         |                                                                                                                                                                                                                              |                                                |     |               |
|------|---------------------------------------------------------------------------------------------------------------------------------------------------------|------------------------------------------------------------------------------------------------------------------------------------------------------------------------------------------------------------------------------|------------------------------------------------|-----|---------------|
| 4295 | C Loveland-Jones, L Ferrer, S Charles, FV Ramsey, A VanZandt, J Volgraf, T Santora, A Pathak, J Dujon, L Sjöholm, J Rappold, A Goldberg.                | A prospective randomized study of the efficacy of "Turning Point," an inpatient violence intervention program.                                                                                                               | Journal of Trauma and Acute Care Surgery       | No  | NA            |
| 4299 | D Öztürk, ZG Baykara, A Karadag, E Eyikara.                                                                                                             | The effect of the application of manual pressure before the administration of intramuscular injections on students' perceptions of post-injection pain: a semi-experimental study.                                           | Journal of Clinical Nursing                    | No  | NA            |
| 4301 | PJ Heesterbeek, AB Wymenga, GG van Hellemond.                                                                                                           | No Difference in Implant Micromotion Between Hybrid Fixation and Fully Cemented Revision Total Knee Arthroplasty: A Randomized Controlled Trial with Radiostereometric Analysis of Patients with Mild-to-Moderate Bone Loss. | Journal of Bone and Joint Surgery              | Yes | NTR1315       |
| 4304 | T Karupaiah, KA Chuah, K Chinna, R Matsuoka, Y Masuda, K Sundram, M Sugano.                                                                             | Comparing effects of soybean oil- and palm olein-based mayonnaise consumption on the plasma lipid and lipoprotein profiles in human subjects: a double-blind randomized controlled trial with cross-over design.             | Lipids in Health and Disease                   | Yes | NMRR154024035 |
| 4313 | PY Hsieh, KY Chen, HY Chen, WH Sheng, CH Chang, CL Wang, PY Chiag, HP Chen, CW Shiao, PC Lee, HC Tai, HF Chien, PJ Yu, BR Lin, YH Lai, JS Chen, HS Lai. | Postoperative Showering for Clean and Clean-contaminated Wounds: A Prospective, Randomized Controlled Trial.                                                                                                                 | Annals of Surgery                              | Yes | NCT01846598   |
| 4315 | PP Reese, O Mgbako, A Mussell, V Potluri, Z Yekta, S Levsky, S Bellamy, CR Parikh, J Shults, K Glanz, HI Feldman, K Volpp.                              | A Pilot Randomized Trial of Financial Incentives or Coaching to Lower Serum Phosphorus in Dialysis Patients.                                                                                                                 | Journal of Renal Nutrition                     | Yes | NCT00622102   |
| 4316 | AE Prick, J de Lange, J Twisk, AM Pot.                                                                                                                  | The effects of a multi-component dyadic intervention on the psychological distress of family caregivers providing care to people with dementia: a randomized controlled trial.                                               | International Psychogeriatrics                 | Yes | NTR1802       |
| 4324 | DK Mayer, AM Deal, JM Crane, RC Chen, GN Asher, LC Hanson, SB Wheeler, A Gerstel, M Green, S Birken, DL Rosenstein.                                     | Using Survivorship Care Plans to Enhance Communication and Cancer Care Coordination: Results of a Pilot Study.                                                                                                               | Oncology Nursing Forum                         | Yes | NCT02111616   |
| 4325 | NH Cha, SR Sok.                                                                                                                                         | Effects of Auricular Acupressure Therapy on Primary Dysmenorrhea for Female High School Students in South Korea.                                                                                                             | Journal of Nursing Scholarship                 | No  | NA            |
| 4331 | KP Valkering, S Aufwerber, F Ranuccio, E Lunini, G Edman, PW Ackermann.                                                                                 | Functional weight-bearing mobilization after Achilles tendon rupture enhances early healing response: a single-blinded randomized controlled trial.                                                                          | Knee Surgery, Sports Traumatology, Arthroscopy | Yes | NCT02318472   |

|      |                                                                                                                    |                                                                                                                                                                                       |                                            |     |                     |
|------|--------------------------------------------------------------------------------------------------------------------|---------------------------------------------------------------------------------------------------------------------------------------------------------------------------------------|--------------------------------------------|-----|---------------------|
| 4338 | D Mays, X Zhao.                                                                                                    | The influence of framed messages and self-affirmation on indoor tanning behavioral intentions in 18- to 30-year-old women.                                                            | Health Psychology                          | No  | NA                  |
| 4349 | J McQuade, S Prinsloo, DZ Chang, A Spelman, Q Wei, K Basen-Engquist, C Harrison, Z Zhang, D Kuban, A Lee, L Cohen. | Qigong/tai chi for sleep and fatigue in prostate cancer patients undergoing radiotherapy: A randomized controlled trial.                                                              | Psycho-Oncology                            | No  | NA                  |
| 4350 | D Tricò, E Filice, S Trifirò, A Natali.                                                                            | Manipulating the sequence of food ingestion improves glycemic control in type 2 diabetic patients under free-living conditions.                                                       | Nutrition and Diabetes                     | Yes | NCT02442024         |
| 4355 | T Clifford, B Berntzen, GW Davison, DJ West, G Howatson, EJ Stevenson.                                             | Effects of Beetroot Juice on Recovery of Muscle Function and Performance between Bouts of Repeated Sprint Exercise.                                                                   | Nutrients                                  | No  | NA                  |
| 4367 | A Urita, T Funakoshi, T Horie, M Nishida, N Iwasaki.                                                               | Difference in vascular patterns between transosseous-equivalent and transosseous rotator cuff repair.                                                                                 | Journal of Shoulder and Elbow Surgery      | No  | NA                  |
| 4379 | C Bolman, SM Eggers, L van Osch, F Te Poel, M Candel, H de Vries.                                                  | Is Action Planning Helpful for Smoking Cessation? Assessing the Effects of Action Planning in a Web-Based Computer-Tailored Intervention.                                             | Substance Use and Misuse                   | Yes | NTR519              |
| 4382 | NK Ilkkaya, FE Ustun, EB Sener, C Kaya, YB Ustun, E Koksall, IS Kocamanoglu, F Ozkan.                              | The effects of music, white noise, and ambient noise on sedation and anxiety in patients under spinal anesthesia during surgery.                                                      | Journal of PeriAnesthesia Nursing          | Yes | ACTRN12613000406707 |
| 4386 | JB Lindheimer, PJ O'Connor, KK McCully, RK Dishman.                                                                | The Effect of Light-Intensity Cycling on Mood and Working Memory in Response to a Randomized, Placebo-Controlled Design.                                                              | Psychosomatic Medicine                     | No  | NA                  |
| 4393 | HE Kirk, KM Gray, K Ellis, J Taffe, KM Cornish.                                                                    | Computerised attention training for children with intellectual and developmental disabilities: a randomised controlled trial.                                                         | Journal of Child Psychology and Psychiatry | Yes | ACTRN12613001180707 |
| 4395 | Y Kang, S Kim, S Sinamo, P Christian.                                                                              | Effectiveness of a community-based nutrition programme to improve child growth in rural Ethiopia: a cluster randomized trial.                                                         | Maternal and Child Nutrition               | Yes | ISRCTN89206590      |
| 4411 | W Butollo, R Karl, J König, R Rosner.                                                                              | A Randomized Controlled Clinical Trial of Dialogical Exposure Therapy versus Cognitive Processing Therapy for Adult Outpatients Suffering from PTSD after Type I Trauma in Adulthood. | Psychotherapy and Psychosomatics           | Yes | NCT01693497         |
| 4429 | RA Shanely, DC Nieman, P Perkins-Veazie, DA Henson, MP Meaney, AM Knab, L Cialdell-Kam.                            | Comparison of Watermelon and Carbohydrate Beverage on Exercise-Induced Alterations in Systemic Inflammation, Immune Dysfunction, and Plasma Antioxidant Capacity.                     | Nutrients                                  | No  | NA                  |
| 4438 | YF Chen, XY Huang, CH Chien, JF Cheng.                                                                             | The Effectiveness of Diaphragmatic Breathing Relaxation Training for Reducing Anxiety.                                                                                                | Perspectives in Psychiatric Care           | No  | NA                  |

|      |                                                                                                                          |                                                                                                                                                                                                                                       |                                                        |     |               |
|------|--------------------------------------------------------------------------------------------------------------------------|---------------------------------------------------------------------------------------------------------------------------------------------------------------------------------------------------------------------------------------|--------------------------------------------------------|-----|---------------|
| 4464 | F Raziani, T Tholstrup, MD Kristensen, ML Svanegaard, C Ritz, A Astrup, A Raben.                                         | High intake of regular-fat cheese compared with reduced-fat cheese does not affect LDL cholesterol or risk markers of the metabolic syndrome: a randomized controlled trial.                                                          | American Journal of Clinical Nutrition                 | Yes | NCT02616471   |
| 4465 | MM Crane, LD Lutes, DS Ward, JM Bowling, DF Tate.                                                                        | A randomized trial testing the efficacy of a novel approach to weight loss among men with overweight and obesity.                                                                                                                     | Obesity                                                | Yes | NCT01843595   |
| 4473 | P Djerf, A Montgomery, B Hallerbäck, HO Håkansson, F Johnsson.                                                           | One- and ten-year outcome of laparoscopic anterior 120° versus total fundoplication: a double-blind, randomized multicenter study.                                                                                                    | Surgical Endoscopy                                     | Yes | NCT01669330   |
| 4487 | V Campos, C Despland, V Brandejsky, R Kreis, P Schneider, A Chiolero, C Boesch, L Tappy.                                 | Sugar- and artificially sweetened beverages and intrahepatic fat: A randomized controlled trial.                                                                                                                                      | Obesity                                                | Yes | NCT01394380   |
| 4488 | CK Nikolaou, CR Hankey, ME Lean.                                                                                         | Elearning approaches to prevent weight gain in young adults: A randomized controlled study.                                                                                                                                           | Obesity                                                | Yes | UMIN000014529 |
| 4495 | N Falsafi.                                                                                                               | A Randomized Controlled Trial of Mindfulness Versus Yoga: Effects on Depression and/or Anxiety in College Students.                                                                                                                   | Journal of the American Psychiatric Nurses Association | No  | NA            |
| 4497 | JB Bertelsen, J Refsgaard, H Kanstrup, SP Johnsen, I Qvist, B Christensen, KL Christensen.                               | Cardiac rehabilitation after acute coronary syndrome comparing adherence and risk factor modification in a community-based shared care model versus hospital-based care in a randomised controlled trial with 12 months of follow-up. | European Journal of Cardiovascular Nursing             | Yes | NCT01522001   |
| 4503 | AC Modi, KA Mann, L Urso, J Peugh.                                                                                       | Preliminary feasibility and efficacy of text messaging and application-based adherence interventions in adolescents with epilepsy.                                                                                                    | Epilepsy and Behavior                                  | No  | NA            |
| 4504 | IC Yu, YF Tsai, JT Fang, MM Yeh, JY Fang, CY Liu.                                                                        | Effects of mouthwash interventions on xerostomia and unstimulated whole saliva flow rate among hemodialysis patients: A randomized controlled study.                                                                                  | International Journal of Nursing Studies               | No  | NA            |
| 4531 | J Camolas, O Santos, P Moreira, I do Carmo.                                                                              | INDIVIDUO: Results from a patient-centered lifestyle intervention for obesity surgery candidates.                                                                                                                                     | Obesity Research and Clinical Practice                 | No  | NA            |
| 4534 | VA Catenacci, Z Pan, D Ostendorf, S Brannon, WS Gozansky, MP Mattson, B Martin, PS MacLean, EL Melanson, W Troy Donahoo. | A randomized pilot study comparing zero-calorie alternate-day fasting to daily caloric restriction in adults with obesity.                                                                                                            | Obesity                                                | No  | NA            |
| 4542 | H Shannon, J Stocks, RK Gregson, C Dunne, MJ Peters, E Main.                                                             | Clinical effects of specialist and on-call respiratory physiotherapy treatments in mechanically ventilated children: A randomised crossover trial.                                                                                    | Physiotherapy                                          | Yes | NCT0199426    |

|      |                                                                                   |                                                                                                                                                                                                         |                                                          |     |                     |
|------|-----------------------------------------------------------------------------------|---------------------------------------------------------------------------------------------------------------------------------------------------------------------------------------------------------|----------------------------------------------------------|-----|---------------------|
| 4554 | DC Shin, CH Song.                                                                 | Smartphone-Based Visual Feedback Trunk Control Training Using a Gyroscope and Mirroring Technology for Stroke Patients: Single-blinded, Randomized Clinical Trial of Efficacy and Feasibility.          | American Journal of Physical Medicine and Rehabilitation | No  | NA                  |
| 4561 | K Nerud, HA Samra.                                                                | Make a Move Intervention to Reduce Childhood Obesity.                                                                                                                                                   | Journal of School Nursing                                | No  | NA                  |
| 4562 | M Bayon-Calatayud, AM Benavente-Valdepeñas, M Del Prado Vazquez-Muñoz.            | Mirror therapy for distal radial fractures: A pilot randomized controlled study.                                                                                                                        | Journal of Rehabilitation Medicine                       | No  | NA                  |
| 4569 | P Paradis-Deschênes, DR Joannis, F Billaut.                                       | Ischemic preconditioning increases muscle perfusion, oxygen uptake, and force in strength-trained athletes.                                                                                             | Applied Physiology, Nutrition, and Metabolism            | No  | NA                  |
| 4575 | A Seyyed-Rasooli, F Salehi, A Mohammadpoorasl, S Goljaryan, Z Seyyedi, B Thomson. | Comparing the effects of aromatherapy massage and inhalation aromatherapy on anxiety and pain in burn patients: A single-blind randomized clinical trial.                                               | Burns                                                    | Yes | IRCT201404176918N17 |
| 4586 | A Ashari, TA Hamid, MR Hussain, KD Hill.                                          | Effectiveness of Individualized Home-Based Exercise on Turning and Balance Performance Among Adults Older than 50 yrs: A Randomized Controlled Trial.                                                   | American Journal of Physical Medicine and Rehabilitation | Yes | ACTRN12613000855729 |
| 4591 | CM Reilly, M Higgins, A Smith, SD Culler, SB Dunbar.                              | Isolating the benefits of fluid restriction in patients with heart failure: A pilot study.                                                                                                              | European Journal of Cardiovascular Nursing               | No  | NA                  |
| 4592 | PF Pires, AC Packer, AV Dibai-Filho, D Rodrigues-Bigaton.                         | Immediate and Short-Term Effects of Upper Thoracic Manipulation on Myoelectric Activity of Sternocleidomastoid Muscles in Young Women With Chronic Neck Pain: A Randomized Blind Clinical Trial.        | Journal of Manipulative and Physiological Therapeutics   | Yes | RBR-7yxnmv          |
| 4593 | JH Abbott, CM Chapple, GK Fitzgerald, JM Fritz, JD Childs, H Harcombe, K Stout.   | The Incremental Effects of Manual Therapy or Booster Sessions in Addition to Exercise Therapy for Knee Osteoarthritis: A Randomized Clinical Trial.                                                     | Journal of Orthopaedic and Sports Physical Therapy       | Yes | ACTRN12612000460808 |
| 4597 | PR Camargo, F Albuquerque-Sendín, MA Avila, MN Haik, A Vieira, TF Salvini.        | Effects of Stretching and Strengthening Exercises, With and Without Manual Therapy, on Scapular Kinematics, Function, and Pain in Individuals With Shoulder Impingement: A Randomized Controlled Trial. | Journal of Orthopaedic and Sports Physical Therapy       | Yes | NCT02035618         |



|      |                                                                                                               |                                                                                                                                                                                                     |                                                          |     |             |
|------|---------------------------------------------------------------------------------------------------------------|-----------------------------------------------------------------------------------------------------------------------------------------------------------------------------------------------------|----------------------------------------------------------|-----|-------------|
| 4620 | H Dong, LJ Sargent, Y Chatzidiakou, C Saunders, L Harkness, N Bordenave, I Rowland, JP Spencer, JA Lovegrove. | Orange pomace fibre increases a composite scoring of subjective ratings of hunger and fullness in healthy adults.                                                                                   | Appetite                                                 | Yes | NCT02116023 |
| 4623 | BS Fernandes, IA Reis, HC Torres.                                                                             | Evaluation of the telephone intervention in the promotion of diabetes self-care: a randomized clinical trial.                                                                                       | Revista Latino-Americana de Enfermagem                   | Yes | RBR-8wx7qb  |
| 4630 | WC Yang, WL Hsu, RM Wu, KH Lin.                                                                               | Immediate Effects of Clock-Turn Strategy on the Pattern and Performance of Narrow Turning in Persons With Parkinson's Disease.                                                                      | Journal of Neurologic Physical Therapy                   | No  | NA          |
| 4635 | RT de Oliveira, LA Felipe, LT Bucken Gobbi, FA Barbieri, G Christofolletti.                                   | Benefits of Exercise on the Executive Functions in People with Parkinson Disease: A Controlled Clinical Trial.                                                                                      | American Journal of Physical Medicine and Rehabilitation | Yes | RBR-56brsc  |
| 4636 | B Gialanella, T Etori, S Faustini, D Baratti, P Bernocchi, L Comini, S Scalvini.                              | Home-Based Telemedicine in Patients with Chronic Neck Pain.                                                                                                                                         | American Journal of Physical Medicine and Rehabilitation | Yes | NCT02736851 |
| 4638 | EJ Hegedus, KW Hardesty, KL Sunderland, RJ Hegedus, JM Smoliga.                                               | A randomized trial of traditional and golf-specific resistance training in amateur female golfers: Benefits beyond golf performance.                                                                | Physical Therapy in Sport                                | No  | NA          |
| 4644 | D Malta, J Arcand, A Ravindran, V Floras, JP Allard, GE Newton.                                               | Adequate intake of potassium does not cause hyperkalemia in hypertensive individuals taking medications that antagonize the renin angiotensin aldosterone system.                                   | American Journal of Clinical Nutrition                   | Yes | NCT02759367 |
| 4645 | A Madjd, MA Taylor, A Delavari, R Malekzadeh, IA Macdonald, HR Farshchi.                                      | Beneficial effect of high energy intake at lunch rather than dinner on weight loss in healthy obese women in a weight-loss program: a randomized clinical trial.                                    | American Journal of Clinical Nutrition                   | Yes | NCT02399280 |
| 4646 | TM Wolever, BJ van Klinken, N Bordenave, M Kaczmarczyk, AL Jenkins, Y Chu, L Harkness.                        | Reformulating cereal bars: high resistant starch reduces in vitro digestibility but not in vivo glucose or insulin response; whey protein reduces glucose but disproportionately increases insulin. | American Journal of Clinical Nutrition                   | Yes | NCT02537587 |
| 4647 | CA Befort, JR Klemp, DK Sullivan, T Shireman, FJ Diaz, K Schmitz, MG Perri, C Fabian.                         | Weight loss maintenance strategies among rural breast cancer survivors: The rural women connecting for better health trial.                                                                         | Obesity                                                  | Yes | NCT01441011 |
| 4648 | M Neal, N Fleming, L Eberman, K Games, J Vaughan.                                                             | Effect of Body-Weight-Support Running on Lower-Limb Biomechanics.                                                                                                                                   | Journal of Orthopaedic and Sports Physical Therapy       | No  | NA          |

|      |                                                                                                                                                     |                                                                                                                                                                  |                                                                     |     |                |
|------|-----------------------------------------------------------------------------------------------------------------------------------------------------|------------------------------------------------------------------------------------------------------------------------------------------------------------------|---------------------------------------------------------------------|-----|----------------|
| 4650 | T Bollard, N Maubach, N Walker, C Ni Mhurchu.                                                                                                       | Effects of plain packaging, warning labels, and taxes on young people's predicted sugar-sweetened beverage preferences: an experimental study.                   | International Journal of Behavioral Nutrition and Physical Activity | No  | NA             |
| 4659 | SJ Fletcher, H Waterman, L Nelson, LA Carter, L Dwyer, C Roberts, D Torgerson, H Kitchener.                                                         | Holistic assessment of women with hyperemesis gravidarum: A randomised controlled trial.                                                                         | International Journal of Nursing Studies                            | Yes | ISRCTN01121147 |
| 4661 | DL Haire-Joshu, CD Schwarz, SB Peskoe, EL Budd, RC Brownson, CE Joshu.                                                                              | A group randomized controlled trial integrating obesity prevention and control for postpartum adolescents in a home visiting program.                            | International Journal of Behavioral Nutrition and Physical Activity | Yes | NCT01617486    |
| 4666 | C Bergamasco, LM Horie, RS Torrinhas, DL Waitzberg.                                                                                                 | High-Fiber Orange Juice as a Nutrition Supplement in Women: A Randomized, Double-Blind, Placebo-Controlled Study of Tolerance and Effectiveness.                 | Journal of Parenteral and Enteral Nutrition                         | Yes | NCT01282983    |
| 4668 | S Porcelli, L Pugliese, E Rejc, G Pavei, M Bonato, M Montorsi, A La Torre, L Rasica, M Marzorati.                                                   | Effects of a Short-Term High-Nitrate Diet on Exercise Performance.                                                                                               | Nutrients                                                           | No  | NA             |
| 4675 | DA McDonald, AH Deakin, BM Ellis, Y Robb, TE Howe, AW Kinninmonth, NB Scott.                                                                        | The technique of delivery of peri-operative analgesia does not affect the rehabilitation or outcomes following total knee arthroplasty.                          | Bone and Joint Journal                                              | Yes | NCT02478372    |
| 4687 | C Hepperger, P Gföller, C Hoser, H Ulmer, F Fischer, W Schobersberger, C Fink.                                                                      | The effects of a 3-month controlled hiking programme on the functional abilities of patients following total knee arthroplasty: a prospective, randomized trial. | Knee Surgery, Sports Traumatology, Arthroscopy                      | No  | NA             |
| 4694 | A Martín-Pintado-Zugasti, D Pecos-Martin, AL Rodríguez-Fernández, IM Alguacil-Diego, A Portillo-Aceituno, T Gallego-Izquierdo, J Fernandez-Carnero. | Ischemic Compression After Dry Needling of a Latent Myofascial Trigger Point Reduces Postneedling Soreness Intensity and Duration.                               | Physical Medicine and Rehabilitation                                | Yes | NCT02169700    |
| 4695 | J Khoo, S Dhamodaran, DD Chen, SY Yap, RY Chen, RH Tian.                                                                                            | Exercise-Induced Weight Loss is More Effective than Dieting for Improving Adipokine Profile, Insulin Resistance, and Inflammation in Obese Men.                  | International Journal of Sport Nutrition and Exercise Metabolism    | Yes | NCT01642576    |
| 4696 | AS Ribeiro, BJ Schoenfeld, DR Silva, FL Pina, DA Guariglia, M Porto, N Maestá, RC Burini, ES Cyrino.                                                | Effect of Two- Versus Three-Way Split Resistance Training Routines on Body Composition and Muscular Strength in Bodybuilders: A Pilot Study.                     | International Journal of Sport Nutrition and                        | No  | NA             |

|      |                                                                                                                                          |                                                                                                                                                                                                                |                                              |     |                     |
|------|------------------------------------------------------------------------------------------------------------------------------------------|----------------------------------------------------------------------------------------------------------------------------------------------------------------------------------------------------------------|----------------------------------------------|-----|---------------------|
|      |                                                                                                                                          |                                                                                                                                                                                                                | Exercise Metabolism                          |     |                     |
| 4701 | H Thompson-Brenner, RM Shingleton, DR Thompson, DA Satir, LK Richards, EM Pratt, DH Barlow.                                              | Focused vs. Broad enhanced cognitive behavioral therapy for bulimia nervosa with comorbid borderline personality: A randomized controlled trial.                                                               | International Journal of Eating Disorders    | Yes | NCT00494858         |
| 4708 | S Michiels, P Van de Heyning, S Truijten, A Hallemans, W De Hertogh.                                                                     | Does multi-modal cervical physical therapy improve tinnitus in patients with cervicogenic somatic tinnitus?                                                                                                    | Manual Therapy                               | Yes | NCT02016313         |
| 4721 | CG Palmer, P Boudreault, BA Berman, A Wolfson, L Duarte, VL Venne, JS Sinsheimer.                                                        | Bilingual approach to online cancer genetics education for Deaf American Sign Language users produces greater knowledge and confidence than English text only: A randomized study.                             | Disability and Health Journal                | No  | NA                  |
| 4724 | G Plaza-Manzano, M Vergara-Vila, S Val-Otero, C Rivera-Prieto, D Pecos-Martin, T Gallego-Izquierdo, A Ferragut-Garcías, N Romero-Franco. | Manual therapy in joint and nerve structures combined with exercises in the treatment of recurrent ankle sprains: A randomized, controlled trial.                                                              | Manual Therapy                               | Yes | NCT02252276         |
| 4725 | I Ris, K Søgaard, B Gram, K Agerbo, E Boyle, B Juul-Kristensen.                                                                          | Does a combination of physical training, specific exercises and pain education improve health-related quality of life in patients with chronic neck pain? A randomised control trial with a 4-month follow up. | Manual Therapy                               | Yes | NCT01431261         |
| 4726 | S Kannan, D Mehta, D Ozog.                                                                                                               | Scalp Closures With Pulley Sutures Reduce Time and Cost Compared to Traditional Layered Technique-A Prospective, Randomized, Observer-Blinded Study.                                                           | Dermatologic Surgery                         | No  | NA                  |
| 4727 | PG Novais, KM Batista, ED Grazziano, MH Amorim.                                                                                          | The effects of progressive muscular relaxation as a nursing procedure used for those who suffer from stress due to multiple sclerosis.                                                                         | Revista Latino-Americana de Enfermagem       | Yes | NCT02673827         |
| 4732 | EH Coulter, AN McLean, JP Hasler, DB Allan, A McFadyen, L Paul.                                                                          | The effectiveness and satisfaction of web-based physiotherapy in people with spinal cord injury: a pilot randomised controlled trial.                                                                          | Spinal Cord                                  | No  | NA                  |
| 4734 | G Özalp Gerçeker, G Karayağız Muslu, F Yardimci.                                                                                         | Children's postoperative symptoms at home through nurse-led telephone counseling and its effects on parents' anxiety: A randomized controlled trial.                                                           | Journal for Specialists in Pediatric Nursing | No  | NA                  |
| 4735 | H Lin, S Zhou, D Zhang, L Huang.                                                                                                         | Evaluation of a nurse-led management program to complement the treatment of adolescent acute lymphoblastic leukemia patients.                                                                                  | Applied Nursing Research                     | No  | NA                  |
| 4739 | Y Mahmodi, S Valiee.                                                                                                                     | A clinical trial of the effect of sexual health education on the quality of life of married Muslim women in Iran.                                                                                              | Women and Birth                              | Yes | IRCT2013011912188N1 |

|      |                                                                                                                                               |                                                                                                                                                                          |                                                                     |     |                     |
|------|-----------------------------------------------------------------------------------------------------------------------------------------------|--------------------------------------------------------------------------------------------------------------------------------------------------------------------------|---------------------------------------------------------------------|-----|---------------------|
| 4740 | H Cramer, B Pokhrel, C Fester, B Meier, F Gass, R Lauche, B Eggleston, M Walz, A Michalsen, R Kunz, G Dobos, J Langhorst.                     | A randomized controlled bicenter trial of yoga for patients with colorectal cancer.                                                                                      | Psycho-Oncology                                                     | Yes | NCT01669109         |
| 4743 | DB Cooper, AO Bowles, JE Kennedy, G Curtiss, LM French, DF Tate, RD Vanderploeg.                                                              | Cognitive Rehabilitation for Military Service Members With Mild Traumatic Brain Injury: A Randomized Clinical Trial.                                                     | Journal of Head Trauma Rehabilitation                               | Yes | NCT01339806         |
| 4747 | T Miloh, M Shub, R Montes, K Ingebo, G Silber, B Pasternak.                                                                                   | Text Messaging Effect on Adherence in Children with Inflammatory Bowel Disease.                                                                                          | Journal of Pediatric Gastroenterology and Nutrition                 | No  | NA                  |
| 4752 | M Cavallo, EM Hunter, K van der Hiele, C Angilletta.                                                                                          | Computerized Structured Cognitive Training in Patients Affected by Early-Stage Alzheimer's Disease is Feasible and Effective: A Randomized Controlled Study.             | Archives of Clinical Neuropsychology                                | No  | NA                  |
| 4757 | KN Park, OY Kwon, CH Yi, HS Cynn, JH Weon, TH Kim, HS Choi.                                                                                   | Effects of Motor Control Exercise Vs Muscle Stretching Exercise on Reducing Compensatory Lumbopelvic Motions and Low Back Pain: A Randomized Trial.                      | Journal of Manipulative and Physiological Therapeutics              | Yes | KCT0000780          |
| 4759 | S Nagata, T Asahara, C Wang, Y Suyama, O Chonan, K Takano, M Daibou, T Takahashi, K Nomoto, Y Yamashiro.                                      | The Effectiveness of Lactobacillus Beverages in Controlling Infections among the Residents of an Aged Care Facility: A Randomized Placebo-Controlled Double-Blind Trial. | Annals of Nutrition and Metabolism                                  | Yes | UMIN000005183       |
| 4765 | C Greaves, F Gillison, A Stathi, P Bennett, P Reddy, J Dunbar, R Perry, D Messom, R Chandler, M Francis, M Davis, C Green, P Evans, G Taylor. | Waste the waist: a pilot randomised controlled trial of a primary care based intervention to support lifestyle change in people with high cardiovascular risk.           | International Journal of Behavioral Nutrition and Physical Activity | Yes | ISRCTN10707899      |
| 4766 | M Danaee-Far, M Maarefvand, H Rafiey.                                                                                                         | Effectiveness of a Brief Home-Based Social Work Motivational Intervention for Male Methamphetamine Users in Tehran: A Randomized Clinical Trial.                         | Substance Use and Misuse                                            | Yes | IRCT2015012020733N1 |
| 4774 | M Iio, M Hamaguchi, M Narita, K Takenaka, Y Ohya.                                                                                             | Tailored Education to Increase Self-Efficacy for Caregivers of Children With Asthma: A Randomized Controlled Trial.                                                      | CIN: Computers, Informatics, Nursing                                | No  | NA                  |
| 4775 | K Isaac, N Umraw, R Cartotto.                                                                                                                 | Construction of Skin Graft Seams in Burn Patients: A Prospective Randomized Double-Blinded Study.                                                                        | Journal of Burn Care and Research                                   | No  | NA                  |
| 4780 | JM Fiszdon, KH Choi, MD Bell, J Choi, SM Silverstein.                                                                                         | Cognitive remediation for individuals with psychosis: efficacy and mechanisms of treatment effects.                                                                      | Psychological Medicine                                              | No  | NA                  |

|      |                                                                                                   |                                                                                                                                                                                            |                                                                     |     |                     |
|------|---------------------------------------------------------------------------------------------------|--------------------------------------------------------------------------------------------------------------------------------------------------------------------------------------------|---------------------------------------------------------------------|-----|---------------------|
| 4800 | T Zimmermann, E Puschmann, H van den Bussche, B Wiese, A Ernst, S Porzelt, A Daubmann, M Scherer. | Collaborative nurse-led self-management support for primary care patients with anxiety, depressive or somatic symptoms: Cluster-randomised controlled trial (findings of the SMADS study). | International Journal of Nursing Studies                            | Yes | NCT01726387         |
| 4802 | DC Bittel, AJ Bittel, C Williams, A Elazzazi.                                                     | Improving Exercise Performance with an Accelerometer-Based Smartphone App: A Randomized Controlled Trial.                                                                                  | American Journal of Physical Medicine and Rehabilitation            | No  | NA                  |
| 4807 | L Sun, KW Tan, PC Siow, CJ Henry.                                                                 | Soya milk exerts different effects on plasma amino acid responses and incretin hormone secretion compared with cows' milk in healthy, young men.                                           | British Journal of Nutrition                                        | No  | NA                  |
| 4810 | M Schröder, K Müller, M Falkenstein, P Stehle, M Kersting, L Libuda.                              | Lunch at school and children's cognitive functioning in the early afternoon: results from the Cognition Intervention Study Dortmund Continued (CoCo).                                      | British Journal of Nutrition                                        | Yes | NCT02344056         |
| 4812 | SC Hughes, S Obayashi.                                                                            | Faith-based intervention to increase fruit and vegetable intake among Koreans in the USA: a feasibility pilot.                                                                             | Public Health Nutrition                                             | No  | NA                  |
| 4818 | L Sun, K Wei Jie Tan, C Jeyakumar Henry.                                                          | Co-ingestion of essence of chicken to moderate glycaemic response of bread.                                                                                                                | International Journal of Food Sciences and Nutrition                | No  | NA                  |
| 4822 | M Teychenne, K Ball, J Salmon, RM Daly, DA Crawford, P Sethi, M Jorna, DW Dunstan.                | Adoption and maintenance of gym-based strength training in the community setting in adults with excess weight or type 2 diabetes: a randomized controlled trial.                           | International Journal of Behavioral Nutrition and Physical Activity | Yes | ACTRN12611000695909 |
| 4823 | SA Friederichs, A Oenema, C Bolman, L Lechner.                                                    | Long term effects of self-determination theory and motivational interviewing in a web-based physical activity intervention: randomized controlled trial.                                   | International Journal of Behavioral Nutrition and Physical Activity | Yes | NTR4129             |
| 4849 | DC Wu, MP Goldman.                                                                                | The Efficacy of Massage in Reducing Nodule Formation After Poly-L-Lactic Acid Administration for Facial Volume Loss: A Randomized, Evaluator-Blinded Clinical Trial.                       | Dermatologic Surgery                                                | No  | NA                  |
| 4851 | X Li, X Cai, X Ma, L Jing, J Gu, L Bao, J Li, M Xu, Z Zhang, Y Li.                                | Short- and Long-Term Effects of Wholegrain Oat Intake on Weight Management and Glucolipid Metabolism in Overweight Type-2 Diabetics: A Randomized Control Trial.                           | Nutrients                                                           | Yes | NCT01495052         |

|      |                                                                                                                                                            |                                                                                                                                                                                                       |                                                         |     |                     |
|------|------------------------------------------------------------------------------------------------------------------------------------------------------------|-------------------------------------------------------------------------------------------------------------------------------------------------------------------------------------------------------|---------------------------------------------------------|-----|---------------------|
| 4853 | K Bridgman, M Onslow, S O'Brian, M Jones, S Block.                                                                                                         | Lidcombe Program Webcam Treatment for Early Stuttering: A Randomized Controlled Trial.                                                                                                                | Journal of Speech, Language, and Hearing Research       | No  | NA                  |
| 4855 | DS West, JR Harvey, RA Krukowski, TE Prewitt, J Priest, T Ashikaga.                                                                                        | Do individual, online motivational interviewing chat sessions enhance weight loss in a group-based, online weight control program?                                                                    | Obesity                                                 | Yes | NCT01232699         |
| 4857 | S Duncan, F Goodyear-Smith, J McPhee, C Zinn, A Grøntved, G Schofield.                                                                                     | Family-centered brief intervention for reducing obesity and cardiovascular disease risk: A randomized controlled trial.                                                                               | Obesity                                                 | Yes | ACTRN1261000138088  |
| 4863 | R Bobrownicki, AC MacPherson, SG Coleman, D Collins, J Sproule.                                                                                            | Re-examining the effects of verbal instructional type on early stage motor learning.                                                                                                                  | Human Movement Science                                  | No  | NA                  |
| 4865 | Ü Yolcu, AH Acar.                                                                                                                                          | Comparison of a new flap design with the routinely used triangular flap design in third molar surgery.                                                                                                | International Journal of Oral and Maxillofacial Surgery | No  | NA                  |
| 4871 | JP Warne, KA Moran, GD Warrington.                                                                                                                         | Eight weeks gait retraining in minimalist footwear has no effect on running economy.                                                                                                                  | Human Movement Science                                  | No  | NA                  |
| 4872 | L Straker, E Howie, A Smith, L Jensen, J Piek, A Campbell.                                                                                                 | A crossover randomised and controlled trial of the impact of active video games on motor coordination and perceptions of physical ability in children at risk of Developmental Coordination Disorder. | Human Movement Science                                  | Yes | ACTRN12611000400965 |
| 4879 | M Murakami, S Fukuma, M Ikezoe, C Iizuka, S Izawa, Y Yamamoto, S Yamazaki, S Fukuhara.                                                                     | Effects of structured education program on organ donor designation of nursing students and their families: A randomized controlled trial.                                                             | Clinical Transplantation                                | Yes | UMIN000014507       |
| 4880 | A Ferragut-Garcías, G Plaza-Manzano, C Rodríguez-Blanco, O Velasco-Roldán, D Pecos-Martín, J Oliva-Pascual-Vaca, B Llabrés-Bennasar, Á Oliva-Pascual-Vaca. | Effectiveness of a Treatment Involving Soft Tissue Techniques and/or Neural Mobilization Techniques in the Management of the Tension-Type Headache: A Randomized Controlled Trial.                    | Archives of Physical Medicine and Rehabilitation        | Yes | ACTRN12615000698572 |
| 4885 | S Dučić, V Radlović, B Bukva, Z Radojičić, G Vrgoč, I Brkić, T Jaramaz Dučić, H Jurdana, D Abramović, N Bojović, L Štefan.                                 | A prospective randomised non-blinded comparison of conventional and Dorgan's crossed pins for paediatric supracondylar humeral fractures.                                                             | Injury                                                  | No  | NA                  |
| 4889 | LR Heleno, RA da Silva, L Shigaki, CG Araújo, CR Coelho Candido, VH Okazaki, A Frisseli, CS Macedo.                                                        | Five-week sensory motor training program improves functional performance and postural control in young male soccer players - A blind randomized clinical trial.                                       | Physical Therapy in Sport                               | Yes | NCT02097940         |
| 4891 | ER Marcon, S Baglioni, L Bittencourt, CL Lopes, CR Neumann, MR Trindade.                                                                                   | What Is the Best Treatment before Bariatric Surgery? Exercise, Exercise and Group Therapy, or Conventional Waiting: a Randomized Controlled Trial.                                                    | Obesity Surgery                                         | Yes | NCT02406976         |

|      |                                                                                                                                |                                                                                                                                                                            |                                                          |     |                |
|------|--------------------------------------------------------------------------------------------------------------------------------|----------------------------------------------------------------------------------------------------------------------------------------------------------------------------|----------------------------------------------------------|-----|----------------|
| 4896 | P Ip, D Chim, KL Chan, TM Li, FK Ho, BW Van Voorhees, A Tiwari, A Tsang, CW Chan, M Ho, W Tso, WH Wong.                        | Effectiveness of a culturally attuned Internet-based depression prevention program for Chinese adolescents: A randomized controlled trial.                                 | Depression and Anxiety                                   | Yes | NCT01783652    |
| 4903 | DW Foster, C Neighbors, A Pai.                                                                                                 | Decisional Balance: Alcohol Decisional Balance Intervention for Heavy Drinking Undergraduates.                                                                             | Substance Use and Misuse                                 | No  | NA             |
| 4907 | Y Gong, L Zhao, L Wang, F Wang.                                                                                                | The effect of clamping the indwelling urinary catheter before removal in cervical cancer patients after radical hysterectomy.                                              | Journal of Clinical Nursing                              | Yes | NCT02083614    |
| 4908 | A Bumrungpert, P Pavadhgul, RW Kalpravidh.                                                                                     | Camellia Oil-Enriched Diet Attenuates Oxidative Stress and Inflammatory Markers in Hypercholesterolemic Subjects.                                                          | Journal of Medicinal Food                                | No  | NA             |
| 4910 | WS Araújo, WG Romero, E Zandonade, MH Amorim.                                                                                  | Effects of relaxation on depression levels in women with high-risk pregnancies: a randomised clinical trial.                                                               | Revista Latino-Americana de Enfermagem                   | No  | NA             |
| 4911 | N Lamberti, S Straudi, AM Malagoni, M ARGIRÒ, M Felisatti, E Nardini, C Zambon, N Basaglia, F Manfredini.                      | Effects of low-intensity endurance and resistance training on mobility in chronic stroke survivors. A pilot, randomized, controlled study.                                 | European Journal of Physical and Rehabilitation Medicine | No  | NA             |
| 4913 | JR Javier, DM Coffey, SM Schrage, LA Palinkas, J Miranda.                                                                      | Prevention of Behavioral Problems in Elementary School-Age Filipino American Children with an Evidence-Based Parenting Intervention: A Randomized Pilot Study in Churches. | Journal of Developmental and Behavioral Pediatrics       | Yes | ISRCTN22549991 |
| 4914 | H Risstad, M Svanevik, JA Kristinsson, J Hjelmsæth, ET Aasheim, D Hofso, TT Søvik, TI Karlsen, MW Fagerland, R Sandbu, T Mala. | Standard vs Distal Roux-en-Y Gastric Bypass in Patients With Body Mass Index 50 to 60: A Double-blind, Randomized Clinical Trial.                                          | JAMA Surgery                                             | Yes | NCT00821197    |
| 4916 | G Gür, C Ayhan, Y Yakut.                                                                                                       | The effectiveness of core stabilization exercise in adolescent idiopathic scoliosis: A randomized controlled trial.                                                        | Prosthetics and Orthotics International                  | Yes | NCT02552615    |
| 4924 | R Fang, X Li.                                                                                                                  | A regular yoga intervention for staff nurse sleep quality and work stress: a randomised controlled trial.                                                                  | Journal of Clinical Nursing                              | No  | NA             |
| 4927 | CJ Rebello, WD Johnson, CK Martin, H Han, YF Chu, N Bordenave, BJ van Klinken, M O'Shea, FL Greenway.                          | Instant Oatmeal Increases Satiety and Reduces Energy Intake Compared to a Ready-to-Eat Oat-Based Breakfast Cereal: A Randomized Crossover Trial.                           | Journal of the American College of Nutrition             | Yes | NCT01666574    |
| 4929 | S Saraf-Bank, A Esmailzadeh, E Faghihimani, L Azadbakht.                                                                       | Effects of Legume-Enriched Diet on Cardiometabolic Risk Factors among Individuals at Risk for Diabetes: A Crossover Study.                                                 | Journal of the American College of Nutrition             | Yes | NCT01906099    |

|      |                                                                                                                                                                                                                                           |                                                                                                                                                         |                                               |     |                     |
|------|-------------------------------------------------------------------------------------------------------------------------------------------------------------------------------------------------------------------------------------------|---------------------------------------------------------------------------------------------------------------------------------------------------------|-----------------------------------------------|-----|---------------------|
| 4930 | YY Soong, RY Quek, CJ Henry.                                                                                                                                                                                                              | Glycemic potency of muffins made with wheat, rice, corn, oat and barley flours: a comparative study between in vivo and in vitro.                       | European Journal of Nutrition                 | No  | NA                  |
| 4931 | TD Spencer, DB Petersen, JL Adams.                                                                                                                                                                                                        | Tier 2 Language Intervention for Diverse Preschoolers: An Early-Stage Randomized Control Group Study Following an Analysis of Response to Intervention. | American Journal of Speech-Language Pathology | No  | NA                  |
| 4934 | J Inouye, C Matsuura, D Li, R Castro, A Leake.                                                                                                                                                                                            | Lifestyle intervention for Filipino Americans at risk for diabetes.                                                                                     | Journal of Community Health Nursing           | No  | NA                  |
| 4939 | S Rezzonico, K Hipfner-Boucher, T Milburn, E Weitzman, J Greenberg, J Pelletier, L Girolametto.                                                                                                                                           | Improving Preschool Educators' Interactive Shared Book Reading: Effects of Coaching in Professional Development.                                        | American Journal of Speech-Language Pathology | No  | NA                  |
| 4945 | S Rvachew, F Brosseau-Lapr e.                                                                                                                                                                                                             | A Randomized Trial of 12-Week Interventions for the Treatment of Developmental Phonological Disorder in Francophone Children.                           | American Journal of Speech-Language Pathology | Yes | NCT00818428         |
| 4952 | D K nig, D Zdzieblik, P Deibert, A Berg, A Gollhofer, M B uchert.                                                                                                                                                                         | Internal Fat and Cardiometabolic Risk Factors Following a Meal-Replacement Regimen vs. Comprehensive Lifestyle Changes in Obese Subjects.               | Nutrients                                     | No  | NA                  |
| 4954 | DL Drane, SM LaRoche, GA Ganesh, D Teagarden, DW Loring.                                                                                                                                                                                  | A standardized diagnostic approach and ongoing feedback improves outcome in psychogenic nonepileptic seizures.                                          | Epilepsy and Behavior                         | No  | NA                  |
| 4955 | D Sparrow, TR DeAngelis, K Hendron, CA Thomas, M Saint-Hilaire, T Ellis.                                                                                                                                                                  | Highly Challenging Balance Program Reduces Fall Rate in Parkinson Disease.                                                                              | Journal of Neurologic Physical Therapy        | Yes | NCT02302144         |
| 4961 | LP Newman, DP Bolhuis, SJ Torres, RS Keast.                                                                                                                                                                                               | Dietary fat restriction increases fat taste sensitivity in people with obesity.                                                                         | Obesity                                       | Yes | ACTRN12611000679987 |
| 4962 | RG Vink, NJ Roumans, LA Arkenbosch, EC Mariman, MA van Baak.                                                                                                                                                                              | The effect of rate of weight loss on long-term weight regain in adults with overweight and obesity.                                                     | Obesity                                       | Yes | NCT01559415         |
| 4972 | Q Denost, P Rouanet, JL Faucheron, Y Panis, B Meunier, E Cotte, G Meurette, S Kirzin, C Sabbagh, J Loriau, S Benoist, C Mariette, I Sielezneff, B Lelong, F Mauvais, B Romain, ML Barussaud, C Germain, MQ Picat, E Rullier, C Laurent, . | To Drain or Not to Drain Infraperitoneal Anastomosis After Rectal Excision for Cancer: The GRECCAR 5 Randomized Trial.                                  | Annals of Surgery                             | Yes | NCT01269567         |



|      |                                                                                              |                                                                                                                                                                   |                                                      |     |             |
|------|----------------------------------------------------------------------------------------------|-------------------------------------------------------------------------------------------------------------------------------------------------------------------|------------------------------------------------------|-----|-------------|
| 4980 | EK Kim, EY Park, JW Sa Gong, SH Jang, YH Choi, HK Lee.                                       | Lasting effect of an oral hygiene care program for patients with stroke during in-hospital rehabilitation: a randomized single-center clinical trial.             | Disability and Rehabilitation                        | No  | NA          |
| 4985 | MK Kim, HG Cha, YJ Shin.                                                                     | Effects of lumbopelvic sling and abdominal drawing-in exercises on lung capacity in healthy adults.                                                               | Journal of Physical Therapy Science                  | No  | NA          |
| 4987 | SL Kim, BH Lee.                                                                              | Effect of Mulligan's mobilization with movement technique on gait function in stroke patients.                                                                    | Journal of Physical Therapy Science                  | No  | NA          |
| 4989 | X Zhang, S Liu, D Yang, L Du, Z Wang.                                                        | The immediate effects of therapeutic keyboard music playing for finger training in adults undergoing hand rehabilitation.                                         | Journal of Physical Therapy Science                  | No  | NA          |
| 4990 | KJ Han, JY Kim.                                                                              | The effects of bilateral movement training on upper limb function in chronic stroke patients.                                                                     | Journal of Physical Therapy Science                  | No  | NA          |
| 4992 | KI Kwak, EK Kim.                                                                             | The clinical effect of hydraulic distension plus manual therapy on patients with frozen shoulder.                                                                 | Journal of Physical Therapy Science                  | No  | NA          |
| 4998 | HS Sohn, MS Shon, KH Lee, SJ Song.                                                           | Clinical comparison of two different plating methods in minimally invasive plate osteosynthesis for clavicular midshaft fractures: A randomized controlled trial. | Injury                                               | No  | NA          |
| 4999 | CJ Powden, KK Hogan, EA Wikstrom, MC Hoch.                                                   | The Effect of Two Forms of Talocrural Joint Traction on Dorsiflexion Range of Motion and Postural Control in Those With Chronic Ankle Instability.                | Journal of Sport Rehabilitation                      | No  | NA          |
| 5002 | MS Cain, SW Garceau, SW Linens.                                                              | Effects of a Four Week Biomechanical Ankle Platform System Protocol on Balance in High School Athletes with Chronic Ankle Instability.                            | Journal of Sport Rehabilitation                      | No  | NA          |
| 5003 | KA Swanik, SJ Thomas, AH Struminger, KC Huxel Bliven, JD Kelly Iv, CB Swanik.                | The Effect of Shoulder Plyometric Training on Amortization Time and Upper Extremity Kinematics.                                                                   | Journal of Sport Rehabilitation                      | No  | NA          |
| 5006 | M Lei, LM Hua, DW Wang.                                                                      | The effect of probiotic treatment on elderly patients with distal radius fracture: a prospective double-blind, placebo-controlled randomised clinical trial.      | Beneficial Microbes                                  | No  | NA          |
| 5008 | G Sohrab, S Ebrahimof, G Sotoudeh, TR Neyestani, P Angoorani, M Hedayati, F Siasi.           | Effects of pomegranate juice consumption on oxidative stress in patients with type 2 diabetes: a single-blind, randomized clinical trial.                         | International Journal of Food Sciences and Nutrition | Yes | NCT02559843 |
| 5010 | NC Mascarin, CA de Lira, RL Vancini, A de Castro Pochini, AC da Silva, M Dos Santos Andrade. | Strength Training Using Elastic Band Improves Muscle Power and Throwing Performance in Young Female Handball Players.                                             | Journal of Sport Rehabilitation                      | Yes | RBR-2j7hbf  |
| 5012 | CJ Wright, SW Linens, MS Cain.                                                               | A Randomized Controlled Trial Comparing Rehabilitation Efficacy in Chronic Ankle Instability.                                                                     | Journal of Sport Rehabilitation                      | No  | NA          |

|      |                                                                                     |                                                                                                                                                                             |                                                |     |                     |
|------|-------------------------------------------------------------------------------------|-----------------------------------------------------------------------------------------------------------------------------------------------------------------------------|------------------------------------------------|-----|---------------------|
| 5018 | SF Crouse, JS Green, TH Meade, DR Smith, SB Smith.                                  | Exercise raises high-density lipoprotein cholesterol in men after consumption of ground beef with a high but not low monounsaturated fatty acid-saturated fatty acid ratio. | Nutrition Research                             | No  | NA                  |
| 5022 | YF Guo, X Zhang, V Plummer, L Lam, W Cross, JP Zhang.                               | Positive psychotherapy for depression and self-efficacy in undergraduate nursing students: A randomized, controlled trial.                                                  | International Journal of Mental Health Nursing | No  | NA                  |
| 5025 | GE Ferreira, F Stieven, F Araujo, M Wiebusch, C Rosa, R Plentz, M Silva.            | Neurodynamic treatment did not improve pain and disability at two weeks in patients with chronic nerve-related leg pain: a randomised trial.                                | Journal of Physiotherapy                       | Yes | NCT01954199         |
| 5026 | K Bustamante Valles, S Montes, Mde J Madrigal, A Burciaga, ME Martínez, MJ Johnson. | Technology-assisted stroke rehabilitation in Mexico: a pilot randomized trial comparing traditional therapy to circuit training in a Robot/technology-assisted therapy gym. | Journal of NeuroEngineering and Rehabilitation | Yes | ISRCTN98578807      |
| 5033 | M Nikseresht, MR Hafezi Ahmadi, M Hedayati.                                         | Detraining-induced alterations in adipokines and cardiometabolic risk factors after nonlinear periodized resistance and aerobic interval training in obese men.             | Applied Physiology, Nutrition, and Metabolism  | Yes | IRCT2012120911670N2 |
| 5034 | MC Zourdos, CD Bazyler, E Jo, AV Khamoui, BS Park, SR Lee, LB Panton, JS Kim.       | Impact of a Submaximal Warm-Up on Endurance Performance in Highly Trained and Competitive Male Runners.                                                                     | Research Quarterly for Exercise and Sport      | No  | NA                  |
